# Supplementary material for: A century of “Camel Research”: a bibliometric analysis
Source: Front Vet Sci. 2023 Jun 1;10:1157667. doi: 10.3389/fvets.2023.1157667 (PMC10267326; doi:10.3389/fvets.2023.1157667)
Supplement: Supplementary file 1 [file Table_1.XLSX]

## Sheet: Sheet1
Affiliations	Record Count	% of 7,617
EGYPTIAN KNOWLEDGE BANK EKB	824	10.818
KING SAUD UNIVERSITY	416	5.461
KING FAISAL UNIVERSITY	320	4.201
INDIAN COUNCIL OF AGRICULTURAL RESEARCH ICAR	306	4.017
ICAR NATIONAL RESEARCH CENTRE ON CAMEL	261	3.427
RAJASTHAN UNIVERSITY OF VETERINARY ANIMAL SCIENCES	211	2.77
CAIRO UNIVERSITY	201	2.639
UNIVERSITY OF KHARTOUM	187	2.455
UNITED ARAB EMIRATES UNIVERSITY	165	2.166
CCS HARYANA AGRICULTURAL UNIVERSITY	143	1.877
CIRAD	140	1.838
QASSIM UNIVERSITY	140	1.838
ZAGAZIG UNIVERSITY	137	1.799
ASSIUT UNIVERSITY	136	1.785
UNIVERSITY OF TEHRAN	127	1.667
NATIONAL RESEARCH CENTRE NRC	118	1.549
CENT VET RES LAB	117	1.536
SHIRAZ UNIVERSITY	109	1.431
INRAE	99	1.3
LANZHOU UNIVERSITY	86	1.129
ALEXANDRIA UNIVERSITY	85	1.116
KAFRELSHEIKH UNIVERSITY	85	1.116
INNER MONGOLIA AGRICULTURAL UNIVERSITY	84	1.103
UNIVERSITY OF AGRICULTURE FAISALABAD	81	1.063
ISLAMIC AZAD UNIVERSITY	76	0.998
MANSOURA UNIVERSITY	72	0.945
BEN GURION UNIVERSITY	71	0.932
INSTITUT DES REGIONS ARIDES	67	0.88
KING ABDULAZIZ UNIVERSITY	67	0.88
UNIVERSITY OF NAIROBI	66	0.866
JORDAN UNIVERSITY OF SCIENCE TECHNOLOGY	63	0.827
CAMEL REPROD CTR	57	0.748
BENHA UNIVERSITY	56	0.735
UDICE FRENCH RESEARCH UNIVERSITIES	55	0.722
UNIVERSITY OF LONDON	54	0.709
GANSU AGRICULTURAL UNIVERSITY	52	0.683
SWEDISH UNIVERSITY OF AGRICULTURAL SCIENCES	52	0.683
CENTRE NATIONAL DE LA RECHERCHE SCIENTIFIQUE CNRS	51	0.67
DESERT RESEARCH CENTER DRC	50	0.656
SWAMI KESHWANAND RAJASTHAN AGRICULTURAL UNIVERSITY SKRAU	48	0.63
ADDIS ABABA UNIVERSITY	46	0.604
SULTAN QABOOS UNIVERSITY	45	0.591
UNIVERSITY OF CALIFORNIA SYSTEM	45	0.591
CGIAR	44	0.578
FERDOWSI UNIVERSITY MASHHAD	44	0.578
UNIVERSITA DEGLI STUDI DI BARI ALDO MORO	44	0.578
CHINESE ACADEMY OF SCIENCES	43	0.565
FOOD AGRICULTURE ORGANIZATION OF THE UNITED NATIONS FAO	43	0.565
HARAMAYA UNIVERSITY	43	0.565
TAIF UNIVERSITY	43	0.565
UNIVERSITY OF VETERINARY MEDICINE HANNOVER FOUNDATION	43	0.565
UNIVERSITY OF HONG KONG	42	0.551
UNIVERSITE DE SFAX	40	0.525
UNIVERSIDAD DE LAS PALMAS DE GRAN CANARIA	39	0.512
UNIVERSITY OF QUEENSLAND	39	0.512
AGRICULTURAL RESEARCH CENTER EGYPT	38	0.499
UNIVERSITY OF VETERINARY ANIMAL SCIENCE PAKISTAN	38	0.499
ETH ZURICH	37	0.486
INTERNATIONAL LIVESTOCK RESEARCH INSTITUTE ILRI	36	0.473
MINIST AGR	35	0.459
AL FARABI KAZAKH NATIONAL UNIVERSITY	34	0.446
ANIMAL HEALTH RESEARCH INSTITUTE AHRI	34	0.446
ECOLE NATIONALE DINGENIEURS DE SFAX ENIS	34	0.446
INST AGRON VET HASSAN II	34	0.446
UNIVERSITY OF VETERINARY MEDICINE VIENNA	34	0.446
UNIVERSITE DE CARTHAGE	33	0.433
UNIVERSITE DE GABES	33	0.433
AHMADU BELLO UNIVERSITY	32	0.42
FREE UNIVERSITY OF BERLIN	32	0.42
ANAND AGRICULTURAL UNIVERSITY	31	0.407
MOHANLAL SUKHADIA UNIVERSITY	31	0.407
VRIJE UNIVERSITEIT BRUSSEL	31	0.407
INSTITUT AGRO	30	0.394
RUSSIAN ACADEMY OF SCIENCES	30	0.394
UNIVERSITY OF SYDNEY	30	0.394
CHINESE ACADEMY OF AGRICULTURAL SCIENCES	29	0.381
SUEZ CANAL UNIVERSITY	29	0.381
UNIVERSITY OF SADAT CITY	29	0.381
AIN SHAMS UNIVERSITY	28	0.368
SOUTH VALLEY UNIVERSITY EGYPT	28	0.368
STATE UNIVERSITY SYSTEM OF FLORIDA	28	0.368
KENYA TRYPANOSOMIASIS RES INST	27	0.354
KUWAIT UNIVERSITY	27	0.354
ADNAN MENDERES UNIVERSITY	26	0.341
CITY OF SCIENTIFIC RESEARCH TECHNOLOGICAL APPLICATIONS SRTA CITY	26	0.341
HASSAN II UNIVERSITY OF CASABLANCA	26	0.341
JUSTUS LIEBIG UNIVERSITY GIESSEN	26	0.341
UNIVERSITE DE LA MANOUBA	26	0.341
CAMEL RES INST INNER MONGOLIA	25	0.328
EMIRATES IND CAMEL MILK PROD	25	0.328
FLANDERS INSTITUTE FOR BIOTECHNOLOGY VIB	25	0.328
ICAR INDIAN VETERINARY RESEARCH INSTITUTE	25	0.328
SUDAN UNIV SCI TECHNOL	25	0.328
UNIVERSITY OF COPENHAGEN	25	0.328
UNITED STATES DEPARTMENT OF AGRICULTURE USDA	24	0.315
UNIVERSITY OF EDINBURGH	24	0.315
ASWAN UNIVERSITY	23	0.302
IMAM ABDULRAHMAN BIN FAISAL UNIVERSITY	23	0.302
SHAHID BAHONAR UNIVERSITY OF KERMAN SBUK	23	0.302
UNIVERSITY OF LONDON ROYAL VETERINARY COLLEGE	23	0.302
SHAHID CHAMRAN UNIVERSITY OF AHVAZ	22	0.289
UNIVERSITY OF LIVERPOOL	22	0.289
AL AZHAR UNIVERSITY	21	0.276
BAHAUDDIN ZAKARIYA UNIVERSITY	21	0.276
NATIONAL VETERINARY INSTITUTE SVA	21	0.276
UNIVERSITE DE MONTPELLIER	21	0.276
UNIVERSITY OF MUNICH	21	0.276
ISLAMIA UNIVERSITY OF BAHAWALPUR	20	0.263
LE RESEAU INTERNATIONAL DES INSTITUTS PASTEUR RIIP	20	0.263
MENOFIA UNIVERSITY	20	0.263
AGROCAMPUS OUEST	19	0.249
CAMEL RANGE RES CTR	19	0.249
ERASMUS MC	19	0.249
ERASMUS UNIVERSITY ROTTERDAM	19	0.249
UNIV MAIDUGURI	19	0.249
UTRECHT UNIVERSITY	19	0.249
CHINA AGRICULTURAL UNIVERSITY	18	0.236
CONSEJO SUPERIOR DE INVESTIGACIONES CIENTIFICAS CSIC	18	0.236
EGERTON UNIVERSITY	18	0.236
INST AGRON VET HASSAN	18	0.236
JOMO KENYATTA UNIVERSITY OF AGRICULTURE TECHNOLOGY	18	0.236
TECHNICAL UNIVERSITY OF DENMARK	18	0.236
UK RESEARCH INNOVATION UKRI	18	0.236
UNIVERSITE DE TUNIS EL MANAR	18	0.236
UNIVERSITY OF MANCHESTER	18	0.236
UNIVERSITY OF OXFORD	18	0.236
UNIVERSITY OF VERMONT	18	0.236
UNIVERSITY SYSTEM OF GEORGIA	18	0.236
FORENS SCI LAB	17	0.223
HUMBOLDT UNIVERSITY OF BERLIN	17	0.223
IMPERIAL COLLEGE LONDON	17	0.223
MURDOCH UNIVERSITY	17	0.223
NATIONAL INSTITUTES OF HEALTH NIH USA	17	0.223
NATIONAL KAOHSIUNG NORMAL UNIVERSITY	17	0.223
TEHRAN UNIVERSITY OF MEDICAL SCIENCES	17	0.223
UNIVERSITY OF BAGHDAD	17	0.223
UNIVERSITY OF LIEGE	17	0.223
UNIVERSITY OF WISCONSIN SYSTEM	17	0.223
WASHINGTON STATE UNIVERSITY	17	0.223
BIOTECHNOLOGY AND BIOLOGICAL SCIENCES RESEARCH COUNCIL BBSRC	16	0.21
CALIFORNIA STATE UNIVERSITY SYSTEM	16	0.21
CENTERS FOR DISEASE CONTROL PREVENTION USA	16	0.21
COLUMBIA UNIVERSITY	16	0.21
KING ABDULAZIZ CITY FOR SCIENCE TECHNOLOGY	16	0.21
MAX PLANCK SOCIETY	16	0.21
MINIST ENVIRONM WATER AGR	16	0.21
NATIONAL CHENG KUNG UNIVERSITY	16	0.21
SMITHSONIAN INSTITUTION	16	0.21
TANTA UNIVERSITY	16	0.21
UNIVERSITE DE LORRAINE	16	0.21
UNIVERSITY OF ILLINOIS SYSTEM	16	0.21
UNIVERSITY OF SHARJAH	16	0.21
VET RES CTR	16	0.21
ABU DHABI FOOD CONTROL AUTHOR	15	0.197
CHR HANSEN	15	0.197
COLORADO STATE UNIVERSITY	15	0.197
CORNELL UNIVERSITY	15	0.197
MAHARANA PRATAP UNIV AGR TECHNOL	15	0.197
UNITED STATES DEPARTMENT OF DEFENSE	15	0.197
UNIVERSITE KASDI MERBAH OUARGLA	15	0.197
UNIVERSITY OF WISCONSIN MADISON	15	0.197
DUKE UNIVERSITY	14	0.184
FRIEDRICH LOEFFLER INSTITUTE	14	0.184
ICAR NATIONAL DAIRY RESEARCH INSTITUTE	14	0.184
INSTITUTE OF TROPICAL MEDICINE ITM	14	0.184
KING FAISAL SPECIALIST HOSPITAL RESEARCH CENTER	14	0.184
KING SAUD BIN ABDULAZIZ UNIVERSITY FOR HEALTH SCIENCES	14	0.184
MONGOLIAN UNIVERSITY OF LIFE SCIENCES	14	0.184
OBIHIRO UNIVERSITY OF AGRICULTURE VETERINARY MEDICINE	14	0.184
RABAT INST	14	0.184
SHAHREKORD UNIVERSITY	14	0.184
UNIVERSITE DE MONTREAL	14	0.184
UNIVERSITY OF BOLOGNA	14	0.184
UNIVERSITY OF CALIFORNIA DAVIS	14	0.184
UNIVERSITY OF CAMBRIDGE	14	0.184
UNIVERSITY OF MICHIGAN	14	0.184
UNIVERSITY OF MICHIGAN SYSTEM	14	0.184
UNIVERSITY OF PRETORIA	14	0.184
UNIVERSITY OF SOUTH FLORIDA	14	0.184
BENI SUEF UNIVERSITY	13	0.171
FLINDERS UNIVERSITY SOUTH AUSTRALIA	13	0.171
HANNOVER MEDICAL SCHOOL	13	0.171
HELWAN UNIVERSITY	13	0.171
HOKKAIDO UNIVERSITY	13	0.171
ICAR NATIONAL BUREAU OF ANIMAL GENETIC RESOURCES	13	0.171
KAZAKH NATIONAL AGRARIAN UNIVERSITY	13	0.171
KENYA CAMEL ASSOC	13	0.171
KU LEUVEN	13	0.171
MICHIGAN STATE UNIVERSITY	13	0.171
MINIA UNIVERSITY	13	0.171
OLD DOMINION UNIVERSITY	13	0.171
UNITED STATES NAVY	13	0.171
UNIVERSITI SAINS MALAYSIA	13	0.171
UNIVERSITY OF BONN	13	0.171
UNIVERSITY OF HANNOVER	13	0.171
UNIVERSITY OF ILLINOIS URBANA CHAMPAIGN	13	0.171
UTAH SYSTEM OF HIGHER EDUCATION	13	0.171
VET RES INST	13	0.171
VIRGINIA POLYTECHNIC INSTITUTE STATE UNIVERSITY	13	0.171
DAMANHOUR UNIVERSITY	12	0.158
HAMAD MEDICAL CORPORATION	12	0.158
HENAN UNIVERSITY	12	0.158
INNER MONGOLIA INST CAMEL RES	12	0.158
INSTITUT DE RECHERCHE POUR LE DEVELOPPEMENT IRD	12	0.158
INTERNATIONAL CENTRE OF INSECT PHYSIOLOGY ECOLOGY ICIPE	12	0.158
IOWA STATE UNIVERSITY	12	0.158
KAROLINSKA INSTITUTET	12	0.158
KING FAISAL UNIV	12	0.158
ROYAL COURT AFFAIRS	12	0.158
SARDARKRUSHINAGAR DANTIWADA AGR UNIV	12	0.158
SOHAG UNIVERSITY	12	0.158
TEXAS A M UNIVERSITY SYSTEM	12	0.158
UNIVERSITE D ORAN	12	0.158
UNIVERSITE DE STRASBOURG	12	0.158
UNIVERSITES DE STRASBOURG ETABLISSEMENTS ASSOCIES	12	0.158
UNIVERSITY OF FLORIDA	12	0.158
UNIVERSITY OF KARACHI	12	0.158
UNIVERSITY OF MINNESOTA SYSTEM	12	0.158
UNIVERSITY OF MINNESOTA TWIN CITIES	12	0.158
YALE UNIVERSITY	12	0.158
ANIM SCI RES INST	11	0.144
AUTONOMOUS UNIVERSITY OF BARCELONA	11	0.144
CENTRE FOR SCIENTIFIC TECHNICAL RESEARCH ON ARID REGIONS CRSTRA	11	0.144
CNRS NATIONAL INSTITUTE FOR BIOLOGY INSB	11	0.144
COLL AGR VET MED	11	0.144
FAC VET MED	11	0.144
GERMAN CENTER FOR INFECTION RESEARCH	11	0.144
GHENT UNIVERSITY	11	0.144
HAWASSA UNIVERSITY	11	0.144
HEBREW UNIVERSITY OF JERUSALEM	11	0.144
JIANGNAN UNIVERSITY	11	0.144
MINISTRY OF HEALTH SAUDI ARABIA	11	0.144
MONGOLIAN ACADEMY OF SCIENCES	11	0.144
NATIONAL UNIVERSITY OF SINGAPORE	11	0.144
OHIO STATE UNIVERSITY	11	0.144
SHAHID SADOUGHI UNIV MED SCI	11	0.144
SMITHSONIAN NATIONAL ZOOLOGICAL PARK CONSERVATION BIOLOGY INSTITUTE	11	0.144
ST JUDE CHILDREN S RESEARCH HOSPITAL	11	0.144
TEXAS A M UNIVERSITY COLLEGE STATION	11	0.144
UNIVERSITE CLAUDE BERNARD LYON 1	11	0.144
UNIVERSITE DE TOULOUSE	11	0.144
UNIVERSITY OF CALIFORNIA LOS ANGELES	11	0.144
UNIVERSITY OF NORTH CAROLINA	11	0.144
XINJIANG UNIVERSITY	11	0.144
YARMOUK UNIVERSITY	11	0.144
CAMEL RES CTR	10	0.131
DENVER MUSEUM NAT SCI	10	0.131
HASHEMITE UNIVERSITY	10	0.131
ICAR CENTRAL ARID ZONE RESEARCH INSTITUTE	10	0.131
KENYA AGR RES INST	10	0.131
KIMRON VET INST	10	0.131
KING KHALID UNIVERSITY	10	0.131
MASHHAD UNIVERSITY MEDICAL SCIENCE	10	0.131
NATIONAL TAIWAN OCEAN UNIVERSITY	10	0.131
NIH NATIONAL INSTITUTE OF ALLERGY INFECTIOUS DISEASES NIAID	10	0.131
PUNJAB AGRICULTURAL UNIVERSITY	10	0.131
SP MED COLL	10	0.131
TARBIAT MODARES UNIVERSITY	10	0.131
TECHNICAL UNIVERSITY OF MUNICH	10	0.131
TEL AVIV UNIVERSITY	10	0.131
UNIVERSITE DE JENDOUBA	10	0.131
UNIVERSITE MOULOUD MAMMERI DE TIZI OUZOU	10	0.131
UNIVERSITY COLLEGE LONDON	10	0.131
UNIVERSITY HOHENHEIM	10	0.131
UNIVERSITY OF VETERINARY SCIENCES BRNO	10	0.131
USMANU DANFODIYO UNIV	10	0.131
UTAH STATE UNIVERSITY	10	0.131
VET SANS FRONTIERES GERMANY	10	0.131
WAGENINGEN UNIVERSITY RESEARCH	10	0.131
ANIM REPROD RES INST	9	0.118
ANIM RESOURCES RES CORP	9	0.118
BOTSWANA UNIV AGR NAT RESOURCES	9	0.118
CENT VET RES LABS	9	0.118
ECOLE NATIONALE VETERINAIRE DE TOULOUSE	9	0.118
EGYPTIAN ATOMIC ENERGY AUTHORITY EAEA	9	0.118
FACULTY OF SCIENCES SFAX	9	0.118
GIFU UNIVERSITY	9	0.118
GOVT DUBAI	9	0.118
GUJARAT AGR UNIV	9	0.118
GURU ANGAD DEV VETERINARY ANIMAL SCIENCES UNIVERSITY GADVASU	9	0.118
IAV HASSAN II	9	0.118
ISARA	9	0.118
KING KHALID UNIVERSITY HOSPITAL	9	0.118
LANZHOU VETERINARY RESEARCH INSTITUTE CAAS	9	0.118
LEIPZIG UNIVERSITY	9	0.118
LIVESTOCK DAIRY DEV DEPT	9	0.118
MAHARASHTRA ANIMAL FISHERY SCIENCES UNIVERSITY	9	0.118
MCGILL UNIVERSITY	9	0.118
PENNSYLVANIA COMMONWEALTH SYSTEM OF HIGHER EDUCATION PCSHE	9	0.118
PHILIPS	9	0.118
PHILIPS RESEARCH	9	0.118
PURDUE UNIVERSITY	9	0.118
PURDUE UNIVERSITY SYSTEM	9	0.118
PURDUE UNIVERSITY WEST LAFAYETTE CAMPUS	9	0.118
SHIRAZ UNIVERSITY OF MEDICAL SCIENCE	9	0.118
UNIV NYALA	9	0.118
UNIVERSITE DE PARIS	9	0.118
UNIVERSITY OF CHINESE ACADEMY OF SCIENCES CAS	9	0.118
UNIVERSITY OF GEORGIA	9	0.118
UNIVERSITY OF ILORIN	9	0.118
UNIVERSITY OF SALFORD	9	0.118
UNIVERSITY OF TENNESSEE SYSTEM	9	0.118
UNIVERSITY OF TOKYO	9	0.118
UNIVERSITY OF ZURICH	9	0.118
UPPSALA UNIVERSITY	9	0.118
WORLD HEALTH ORGANIZATION	9	0.118
AARHUS UNIVERSITY	8	0.105
AGR RES EDUC EXTENS ORG AREEO	8	0.105
ALL INDIA INSTITUTE OF MEDICAL SCIENCES AIIMS NEW DELHI	8	0.105
ALMATY TECHNOL UNIV	8	0.105
BARTRIDGE PARTNERS	8	0.105
DEPT LAND RESOURCE MANAGEMENT	8	0.105
EBERHARD KARLS UNIVERSITY OF TUBINGEN	8	0.105
HELMHOLTZ ASSOCIATION	8	0.105
HENAN UNIVERSITY OF URBAN CONSTRUCTION	8	0.105
INTERNATIONAL CENTER FOR AGRICULTURAL RESEARCH IN THE DRY AREAS ICARDA	8	0.105
ISFAHAN UNIVERSITY MEDICAL SCIENCE	8	0.105
JIGJIGA UNIV	8	0.105
KERMAN UNIVERSITY OF MEDICAL SCIENCES	8	0.105
MINIST AGR WATER	8	0.105
MINIST JIHAD E AGR	8	0.105
MINIST PUBL HLTH	8	0.105
NATIONAL AERONAUTICS SPACE ADMINISTRATION NASA	8	0.105
NATIONAL INSTITUTE OF INFECTIOUS DISEASES NIID	8	0.105
NETHERLANDS NATIONAL INSTITUTE FOR PUBLIC HEALTH THE ENVIRONMENT	8	0.105
NEW YORK UNIVERSITY	8	0.105
NINTI ONE LTD	8	0.105
PASTEUR INSTITUTE OF IRAN	8	0.105
PRINCESS NOURAH BINT ABDULRAHMAN UNIVERSITY	8	0.105
RAKUNO GAKUEN UNIVERSITY	8	0.105
RAZI VACCINE SERUM RES INST	8	0.105
SHAHID BEHESHTI UNIVERSITY MEDICAL SCIENCES	8	0.105
SINDH AGRICULTURAL UNIVERSITY	8	0.105
SORBONNE UNIVERSITE	8	0.105
UNITED ARAB EMIRATES UNIV UAEU	8	0.105
UNIV BAHRI	8	0.105
UNIVERSITE DE LILLE	8	0.105
UNIVERSITE DE LILLE ISITE	8	0.105
UNIVERSITE DE SOUSSE	8	0.105
UNIVERSITI PUTRA MALAYSIA	8	0.105
UNIVERSITY OF ADELAIDE	8	0.105
UNIVERSITY OF ARIZONA	8	0.105
UNIVERSITY OF EXETER	8	0.105
UNIVERSITY OF GLASGOW	8	0.105
UNIVERSITY OF HELSINKI	8	0.105
UNIVERSITY OF MANITOBA	8	0.105
UNIVERSITY OF MELBOURNE	8	0.105
UNIVERSITY OF NEW ENGLAND	8	0.105
UNIVERSITY OF PENNSYLVANIA	8	0.105
UNIVERSITY OF TEXAS SYSTEM	8	0.105
URMIA UNIVERSITY	8	0.105
WEILL CORNELL MEDICAL COLLEGE QATAR	8	0.105
AGRESEARCH NEW ZEALAND	7	0.092
AL AIN HOSP	7	0.092
AL FATEH UNIVERSITY	7	0.092
ALFAISAL UNIVERSITY	7	0.092
ALIGARH MUSLIM UNIVERSITY	7	0.092
ARID AGRICULTURE UNIVERSITY	7	0.092
BU ALI SINA UNIVERSITY	7	0.092
CENT VET LAB	7	0.092
CHARITE UNIVERSITATSMEDIZIN BERLIN	7	0.092
COLL VET SCI	7	0.092
COLLEGE OF TECHNOLOGY ENGINEERING UDAIPUR	7	0.092
COMMONWEALTH SCIENTIFIC INDUSTRIAL RESEARCH ORGANISATION CSIRO	7	0.092
COUNCIL OF SCIENTIFIC INDUSTRIAL RESEARCH CSIR INDIA	7	0.092
ECOHLTH ALLIANCE	7	0.092
ECOLE NATIONALE SUPERIEURE VETERINAIRE	7	0.092
FAHRENHEIT UNIVERSITIES	7	0.092
HASSAN II AGRON VET INST	7	0.092
IBN TOFAIL UNIVERSITY OF KENITRA	7	0.092
ICAR NATIONAL RESEARCH CENTRE ON EQUINES	7	0.092
IRTA	7	0.092
JAZAN UNIVERSITY	7	0.092
KENYA AGR LIVESTOCK RES ORG	7	0.092
KENYA MEDICAL RESEARCH INSTITUTE	7	0.092
KING S COLLEGE LONDON	7	0.092
KOBE UNIVERSITY	7	0.092
LONDON SCHOOL OF HYGIENE TROPICAL MEDICINE	7	0.092
LOUISIANA STATE UNIVERSITY	7	0.092
LOUISIANA STATE UNIVERSITY SYSTEM	7	0.092
M AUEZOV SOUTH KAZAKHSTAN STATE UNIVERSITY	7	0.092
MINIST AGR FISHERIES	7	0.092
MONTPELLIER SUPAGRO	7	0.092
MONTPELLIER UNIV	7	0.092
MUSEUM NATIONAL D HISTOIRE NATURELLE MNHN	7	0.092
NANJING MEDICAL UNIVERSITY	7	0.092
NATIONAL AGRICULTURAL RESEARCH COUNCIL PAKISTAN	7	0.092
NAVAL MEDICAL RESEARCH CENTER NMRC	7	0.092
NAVAL MEDICAL RESEARCH UNIT NO 3 NAMRU 3	7	0.092
NORWEGIAN UNIVERSITY OF LIFE SCIENCES	7	0.092
OSAKA UNIVERSITY	7	0.092
PETRA UNIVERSITY	7	0.092
PRINCETON UNIVERSITY	7	0.092
QATAR UNIVERSITY	7	0.092
REPROD BIOTECHNOL CTR	7	0.092
SARATOV SCIENTIFIC CENTER OF THE RUSSIAN ACADEMY OF SCIENCES	7	0.092
SEVERTSOV INSTITUTE OF ECOLOGY EVOLUTION	7	0.092
SHAQRA UNIVERSITY	7	0.092
SOMALI NATL UNIV	7	0.092
SOROKA MEDICAL CENTER	7	0.092
TOHOKU UNIVERSITY	7	0.092
TRINITY COLLEGE DUBLIN	7	0.092
UMM AL QURA UNIVERSITY	7	0.092
UNIVERSITE PARIS SACLAY	7	0.092
UNIVERSITY OF BRISTOL	7	0.092
UNIVERSITY OF CALIFORNIA SAN FRANCISCO	7	0.092
UNIVERSITY OF GUELPH	7	0.092
UNIVERSITY OF JORDAN	7	0.092
UNIVERSITY OF LONDON SCHOOL ORIENTAL AFRICAN STUDIES SOAS	7	0.092
UNIVERSITY OF MASSACHUSETTS SYSTEM	7	0.092
UNIVERSITY OF MISSOURI SYSTEM	7	0.092
UNIVERSITY OF MOHAGHEGH ARDABILI	7	0.092
UNIVERSITY OF NOTTINGHAM	7	0.092
UNIVERSITY OF OTAGO	7	0.092
UNIVERSITY OF SARGODHA	7	0.092
UNIVERSITY OF TENNESSEE KNOXVILLE	7	0.092
UNIVERSITY OF TORONTO	7	0.092
UNIVERSITY OF VIENNA	7	0.092
VET SERUM VACCINE RES INST	7	0.092
VETAGRO SUP	7	0.092
VIRTUAL UNIVERSITY OF PAKISTAN	7	0.092
YANGZHOU UNIVERSITY	7	0.092
YASOUJ UNIVERSITY	7	0.092
ZHEJIANG UNIVERSITY	7	0.092
ZOOLOGICAL SOCIETY OF LONDON	7	0.092
ACADEMY OF SCIENCES OF UZBEKISTAN	6	0.079
AGRICULTURE AGRI FOOD CANADA	6	0.079
AIX MARSEILLE UNIVERSITE	6	0.079
AMERICAN MUSEUM OF NATURAL HISTORY AMNH	6	0.079
ATATURK UNIVERSITY	6	0.079
CALIFORNIA INSTITUTE OF TECHNOLOGY	6	0.079
CHARLES DARWIN UNIVERSITY	6	0.079
COLL VET SCI ANIM HUSB	6	0.079
CTY GOVT MARSABIT	6	0.079
CZECH ACADEMY OF SCIENCES	6	0.079
DEPT AGR FOOD	6	0.079
FUDAN UNIVERSITY	6	0.079
HENAN UNIVERSITY OF SCIENCE TECHNOLOGY	6	0.079
HIGHER NATL VET SCH	6	0.079
HUAZHONG AGRICULTURAL UNIVERSITY	6	0.079
HUNGARIAN UNIVERSITY OF AGRICULTURE LIFE SCIENCES	6	0.079
INSTITUT NATIONAL DE LA SANTE ET DE LA RECHERCHE MEDICALE INSERM	6	0.079
INSTITUT PASTEUR TUNIS	6	0.079
ISFAHAN UNIVERSITY OF TECHNOLOGY	6	0.079
JILIN UNIVERSITY	6	0.079
JOHNS HOPKINS UNIVERSITY	6	0.079
KING KHALED EYE SPECIALIST HOSPITAL	6	0.079
LALA LAJPAT RAI UNIVERSITY OF VETERINARY ANIMAL SCIENCES	6	0.079
LEIDEN UNIVERSITY	6	0.079
LEIDEN UNIVERSITY EXCL LUMC	6	0.079
MASSACHUSETTS INSTITUTE OF TECHNOLOGY MIT	6	0.079
MEDICAL UNIVERSITY GDANSK	6	0.079
MEKELLE UNIVERSITY	6	0.079
MONGOLIAN UNIVERSITY SCIENCE TECHNOLOGY	6	0.079
MUSTAFA KEMAL UNIVERSITY	6	0.079
NATL INST VET RES	6	0.079
NATL VET INST	6	0.079
NEGEV INST ARID ZONE RES	6	0.079
NIPPON VETERINARY LIFE SCIENCE UNIVERSITY	6	0.079
NORTHWEST A F UNIVERSITY CHINA	6	0.079
OREGON STATE UNIVERSITY	6	0.079
PIRBRIGHT INSTITUTE	6	0.079
PRINCE SULTAN MILITARY MEDICAL CITY	6	0.079
RES INST ANIM PROD	6	0.079
SADYKOV INSTITUTE OF BIOORGANIC CHEMISTRY	6	0.079
SEMNAN UNIVERSITY	6	0.079
SHANGHAI JIAO TONG UNIVERSITY	6	0.079
SUN YAT SEN UNIVERSITY	6	0.079
THARB CAMEL HOSP	6	0.079
U P PANDIT DEEN DAYAL UPADHYAYA PASHU CHIKITSA VIGYAN VISHWAVIDYALAYA EVAM GO	6	0.079
UNIV BLIDA 1	6	0.079
UNIV GADARIF	6	0.079
UNIVERSIDAD DE CORDOBA	6	0.079
UNIVERSIDADE DE SAO PAULO	6	0.079
UNIVERSITE CLERMONT AUVERGNE UCA	6	0.079
UNIVERSITE D EL OUED	6	0.079
UNIVERSITE IBN KHALDOUN TIARET	6	0.079
UNIVERSITE SAAD DAHLAB DE BLIDA	6	0.079
UNIVERSITI MALAYA	6	0.079
UNIVERSITI TEKNOLOGI MARA	6	0.079
UNIVERSITY HA IL	6	0.079
UNIVERSITY OF ALBERTA	6	0.079
UNIVERSITY OF BASEL	6	0.079
UNIVERSITY OF BERN	6	0.079
UNIVERSITY OF CONNECTICUT	6	0.079
UNIVERSITY OF ESSEX	6	0.079
UNIVERSITY OF IOWA	6	0.079
UNIVERSITY OF JEDDAH	6	0.079
UNIVERSITY OF MILAN	6	0.079
UNIVERSITY OF MISSOURI COLUMBIA	6	0.079
UNIVERSITY OF NEBRASKA SYSTEM	6	0.079
UNIVERSITY OF NIZWA	6	0.079
UNIVERSITY OF PITTSBURGH	6	0.079
UNIVERSITY OF PRINCE EDWARD ISLAND	6	0.079
UNIVERSITY OF READING	6	0.079
UNIVERSITY OF SCIENCE TECHNOLOGY OF CHINA CAS	6	0.079
UNIVERSITY OF TABUK	6	0.079
UNIVERSITY OF TURIN	6	0.079
UNIVERSITY OF WESTERN AUSTRALIA	6	0.079
UT INSTITUTE OF AGRICULTURE	6	0.079
VET RES ADM	6	0.079
VET RES LAB	6	0.079
VOLCANI INSTITUTE OF AGRICULTURAL RESEARCH	6	0.079
WESTERN UNIVERSITY OF HEALTH SCIENCES	6	0.079
WILD CAMEL PROTECT FDN	6	0.079
WOLKITE UNIV	6	0.079
ABU DHABI MUNICIPAL	5	0.066
ACADEMY OF SCIENCES OF TURKMENISTAN	5	0.066
ANIM PROD RES INST	5	0.066
BOSTON UNIVERSITY	5	0.066
CALIFORNIA STATE UNIVERSITY NORTHRIDGE	5	0.066
CHOLISTAN UNIV VET ANIM SCI	5	0.066
CITY UNIVERSITY OF NEW YORK CUNY SYSTEM	5	0.066
COLL VET ANIM SCI	5	0.066
CURTIN UNIVERSITY	5	0.066
CZECH UNIVERSITY OF LIFE SCIENCES PRAGUE	5	0.066
DEPT NAT RESOURCES ENVIRONM ARTS SPORT	5	0.066
ECOLE NATIONALE VETERINAIRE AGROALIMENTAIRE ET DE L ALIMENTATION NANTES ATLANTIQUE	5	0.066
EMORY UNIVERSITY	5	0.066
FAC VET SCI KHARTOUM	5	0.066
FACULTE DES SCIENCES DE TUNIS FST	5	0.066
FAYOUM UNIVERSITY	5	0.066
GEORGE WASHINGTON UNIVERSITY	5	0.066
GOLESTAN UNIV MED SCI	5	0.066
GUANGZHOU MEDICAL UNIVERSITY	5	0.066
HAMAD BIN KHALIFA UNIVERSITY QATAR	5	0.066
HARVARD UNIVERSITY	5	0.066
HASSAN FIRST UNIVERSITY OF SETTAT	5	0.066
HASSAN II AGRON VET MED INST	5	0.066
HENAN AGRICULTURAL UNIVERSITY	5	0.066
HOPITAL RAZI	5	0.066
ICAR CENTRAL SHEEP WOOL RESEARCH INSTITUTE	5	0.066
INST AGRON VET	5	0.066
INST ANIM	5	0.066
INSTITUTE OF ANIMAL HUSBANDRY VETERINARY MEDICINE	5	0.066
INSTITUTE OF ANIMAL SCIENCE CAAS	5	0.066
ISLAMIA UNIV	5	0.066
IZS DELL ABRUZZO E DEL MOLISE GIUSEPPE CAPORALE	5	0.066
KANSAS STATE UNIVERSITY	5	0.066
KENYATTA UNIVERSITY	5	0.066
KHALIFA UNIVERSITY OF SCIENCE TECHNOLOGY	5	0.066
KING ABDULAZIZ CITY SCI TECHNOL	5	0.066
KING ABDULLAH INTERNATIONAL MEDICAL RESEARCH CENTER KAIMRC	5	0.066
KYOTO UNIVERSITY	5	0.066
MAKERERE UNIVERSITY	5	0.066
MASSEY UNIVERSITY	5	0.066
MATER RESEARCH	5	0.066
MATROUH UNIV	5	0.066
MEDICAL UNIVERSITY OF VIENNA	5	0.066
MINIST AGR LIVESTOCK FISHERIES	5	0.066
MINIST HLTH	5	0.066
MISURATA UNIV	5	0.066
MOHAMMED V UNIVERSITY IN RABAT	5	0.066
NASA JET PROPULSION LABORATORY JPL	5	0.066
NATL ANIM HLTH DIAGNOST INVEST CTR	5	0.066
NATL VET RES INST	5	0.066
NORTH CAROLINA STATE UNIVERSITY	5	0.066
NORTHERN BORDERS UNIVERSITY	5	0.066
OSMANIA UNIVERSITY	5	0.066
PAYAME NOOR UNIVERSITY	5	0.066
PEKING UNIVERSITY	5	0.066
QUEENSLAND DEPARTMENT OF AGRICULTURE FISHERIES	5	0.066
RAZI UNIVERSITY	5	0.066
ROSLIN INSTITUTE	5	0.066
ROSTOV STATE NAT RESERVE	5	0.066
RUTGERS STATE UNIVERSITY NEW BRUNSWICK	5	0.066
RWTH AACHEN UNIVERSITY	5	0.066
SCITECH CTR	5	0.066
SELCUK UNIVERSITY	5	0.066
SHANGHAI INSTITUTES FOR BIOLOGICAL SCIENCES CAS	5	0.066
SHANXI NORMAL UNIVERSITY	5	0.066
SHIHEZI UNIVERSITY	5	0.066
ST PETERSBURG SCIENTIFIC CENTRE OF THE RUSSIAN ACADEMY OF SCIENCES	5	0.066
TONGJI UNIVERSITY	5	0.066
UNITED STATES DEPARTMENT OF ENERGY DOE	5	0.066
UNIV KORDOFAN	5	0.066
UNIVERSITE D ARTOIS	5	0.066
UNIVERSITE DE MONASTIR	5	0.066
UNIVERSITE DE SOUK AHRAS MOHAMMED CHERIF MESSAADIA	5	0.066
UNIVERSITY COLLEGE DUBLIN	5	0.066
UNIVERSITY OF AL QADISIYAH	5	0.066
UNIVERSITY OF BELGRADE	5	0.066
UNIVERSITY OF CALIFORNIA SAN DIEGO	5	0.066
UNIVERSITY OF CHICAGO	5	0.066
UNIVERSITY OF EAST ANGLIA	5	0.066
UNIVERSITY OF IBADAN	5	0.066
UNIVERSITY OF ISFAHAN	5	0.066
UNIVERSITY OF LEEDS	5	0.066
UNIVERSITY OF LIMERICK	5	0.066
UNIVERSITY OF MESSINA	5	0.066
UNIVERSITY OF MICHIGAN FLINT	5	0.066
UNIVERSITY OF SASKATCHEWAN	5	0.066
UNIVERSITY OF TABRIZ	5	0.066
UNIVERSITY OF WATERLOO	5	0.066
UNIVERSITY SCIENCE TECHNOLOGY HOUARI BOUMEDIENE	5	0.066
WELLCOME TRUST SANGER INSTITUTE	5	0.066
WILDLIFE CONSERVATION SOCIETY	5	0.066
WOLLO UNIV	5	0.066
WUHAN INSTITUTE OF VIROLOGY CAS	5	0.066
ABUBAKAR TAFAWA BALEWA UNIV	4	0.053
ACHARYA N G RANGA AGRICULTURAL UNIVERSITY	4	0.053
AFRICAN MEDICAL RESEARCH FOUNDATION AMREF	4	0.053
AGENCE NATIONALE DE SECURITE SANITAIRE DE L ALIMENTATION DE L ENVIRONNEMENT DU TRAVAIL ANSES	4	0.053
AGROPARISTECH	4	0.053
AL BAHA UNIVERSITY	4	0.053
AL JOUF UNIVERSITY	4	0.053
ALFATEH UNIV	4	0.053
ARABIAN GULF UNIVERSITY	4	0.053
AREEO	4	0.053
ATBARA VET RES LAB	4	0.053
BABRAHAM INSTITUTE	4	0.053
BAQIYATALLAH UNIVERSITY OF MEDICAL SCIENCES BMSU	4	0.053
BEIJING TECHNOLOGY BUSINESS UNIVERSITY	4	0.053
BERLIN INST HLTH	4	0.053
BIOTECHNOL RES CTR	4	0.053
CAMEL REPROD LAB	4	0.053
CENT LAND COUNCIL	4	0.053
CENTRE NATIONAL DE LA RECHERCHE SCIENTIFIQUE TECHNOLOGIQUE CNRST	4	0.053
CHINESE ACADEMY OF FORESTRY	4	0.053
CHU DE TOULOUSE	4	0.053
CHUVASH STATE AGRARIAN UNIVERSITY	4	0.053
CITY UNIVERSITY OF HONG KONG	4	0.053
CNESTEN	4	0.053
CONNECTICUT STATE UNIVERSITY SYSTEM	4	0.053
CSIR NATIONAL ENVIRONMENTAL ENGINEERING RESEARCH INSTITUTE NEERI	4	0.053
CTR AGR PROJECT	4	0.053
DEPARTMENT OF BIOTECHNOLOGY DBT INDIA	4	0.053
EASTERN CONNECTICUT STATE UNIVERSITY	4	0.053
ECOLE NATIONALE VETERINAIRE D ALFORT ENVA	4	0.053
EOTVOS LORAND UNIVERSITY	4	0.053
ETHIOPIAN INSTITUTE OF AGRICULTURAL RESEARCH EIAR	4	0.053
EUROIMMUN	4	0.053
EUROPEAN FOOD SAFETY AUTHORITY	4	0.053
FAC VET SCI	4	0.053
FAC VET SCI KHARTOUM N	4	0.053
FAO SUBREG OFF NORTH AFRICA	4	0.053
FARS IRIB	4	0.053
FED DAIRY RES INST	4	0.053
FOOD AGR ORG UNITED NATIONS FAO	4	0.053
FORENS EVIDENCE DEPT	4	0.053
FRIESLANDCAMPINA	4	0.053
GOMAL UNIVERSITY	4	0.053
GOVERNMENT COLLEGE UNIVERSITY FAISALABAD	4	0.053
GOVT RAJASTHAN	4	0.053
HUMAN LINK	4	0.053
HUNAN CANC HOSP	4	0.053
ICAR DIRECTORATE ON FOOT MOUTH DISEASE	4	0.053
ICAR NATIONAL INSTITUTE OF VETERINARY EPIDEMIOLOGY DISEASE INFORMATICS	4	0.053
IGDIR UNIVERSITY	4	0.053
INONU UNIVERSITY	4	0.053
INST PASTEUR	4	0.053
INSTITUT PASTEUR PARIS	4	0.053
INSTITUTE OF CYTOLOGY RAS	4	0.053
INT DAIRY FEDERAT	4	0.053
INT LAB RES ANIM DIS	4	0.053
ISTITUTO NAZIONALE DI FISICA NUCLEARE INFN	4	0.053
JILIN CANC HOSP	4	0.053
JIMMA UNIVERSITY	4	0.053
JINNAH UNIV WOMEN	4	0.053
KARLSRUHE INSTITUTE OF TECHNOLOGY	4	0.053
KASETSART UNIVERSITY	4	0.053
KUNMING INSTITUTE OF ZOOLOGY	4	0.053
KUNMING MEDICAL UNIVERSITY	4	0.053
LANZHOU INSTITUTE OF HUSBANDRY PHARMACEUTICAL SCIENCES CAAS	4	0.053
LAVAL UNIVERSITY	4	0.053
LIVERPOOL SCHOOL OF TROPICAL MEDICINE	4	0.053
LOUISIANA STATE UNIVERSITY SCHOOL OF VETERINARY MEDICINE	4	0.053
MAJMAAH UNIVERSITY	4	0.053
MINIST AGR LIVESTOCK FISHERIES IRRIGAT	4	0.053
MINIST ENVIRONM	4	0.053
MISSISSIPPI STATE UNIVERSITY	4	0.053
NANCHANG UNIVERSITY	4	0.053
NANJING AGRICULTURAL UNIVERSITY	4	0.053
NANKAI UNIVERSITY	4	0.053
NATIONAL CANCER INSTITUTE EGYPT	4	0.053
NATIONAL CENTER FOR RADIATION RESEARCH TECHNOLOGY	4	0.053
NATIONAL RESEARCH FOUNDATION SOUTH AFRICA	4	0.053
NATIONAL UNIVERSITY OF CORDOBA	4	0.053
NATL MUSEUMS KENYA	4	0.053
NATL RES CTR	4	0.053
NEW VALLEY UNIV	4	0.053
NEW YORK UNIV ABU DHABI	4	0.053
NSW DEPARTMENT OF PRIMARY INDUSTRIES	4	0.053
OKLAHOMA STATE UNIVERSITY STILLWATER	4	0.053
OKLAHOMA STATE UNIVERSITY SYSTEM	4	0.053
PEGAH MILK CO	4	0.053
QATAR FOUNDATION	4	0.053
QUJING NORMAL UNIV	4	0.053
RESEARCH CENTER OF BIOTECHNOLOGY RAS	4	0.053
RESEARCH INSTITUTE OF FOREST ECOLOGY ENVIRONMENT AND PROTECTION CAF	4	0.053
SACKLER FACULTY OF MEDICINE	4	0.053
SAPIENZA UNIVERSITY ROME	4	0.053
SARI AGRICULTURAL SCIENCES NATURAL RESOURCES UNIVERSITY SANRU	4	0.053
SHAANXI NORMAL UNIVERSITY	4	0.053
SHAHID BEHESHTI UNIVERSITY	4	0.053
SMITHSONIAN NATIONAL MUSEUM OF NATURAL HISTORY	4	0.053
SOUTHERN ILLINOIS UNIVERSITY	4	0.053
SOUTHERN ILLINOIS UNIVERSITY SYSTEM	4	0.053
STANFORD UNIVERSITY	4	0.053
STATE KEY LABORATORY OF RESPIRATORY DISEASE	4	0.053
SUPREME COUNCIL HLTH	4	0.053
SZECHENYI ISTVAN UNIV	4	0.053
TABRIZ UNIVERSITY OF MEDICAL SCIENCE	4	0.053
TAIBAH UNIVERSITY	4	0.053
TEMPLE UNIVERSITY	4	0.053
TOTTORI UNIVERSITY	4	0.053
UAE BIOTECH RES CTR	4	0.053
UNIV AL BUTANA	4	0.053
UNIV GEZIRA	4	0.053
UNIV MOHAMED SEDDIK BENYAHIA JIJEL	4	0.053
UNIVERSITE ABOU BEKR BELKAID	4	0.053
UNIVERSITE DE BRETAGNE OCCIDENTALE	4	0.053
UNIVERSITE DU LITTORAL COTE D OPALE	4	0.053
UNIVERSITY COLLEGE CORK	4	0.053
UNIVERSITY OF ABERDEEN	4	0.053
UNIVERSITY OF BALOCHISTAN	4	0.053
UNIVERSITY OF BARCELONA	4	0.053
UNIVERSITY OF BIRMINGHAM	4	0.053
UNIVERSITY OF BOTSWANA	4	0.053
UNIVERSITY OF BRESCIA	4	0.053
UNIVERSITY OF BRITISH COLUMBIA	4	0.053
UNIVERSITY OF COLOGNE	4	0.053
UNIVERSITY OF COLORADO SYSTEM	4	0.053
UNIVERSITY OF GREENWICH	4	0.053
UNIVERSITY OF IDAHO	4	0.053
UNIVERSITY OF KENTUCKY	4	0.053
UNIVERSITY OF MURCIA	4	0.053
UNIVERSITY OF NEBRASKA LINCOLN	4	0.053
UNIVERSITY OF NEW MEXICO	4	0.053
UNIVERSITY OF OSLO	4	0.053
UNIVERSITY OF PADERBORN	4	0.053
UNIVERSITY OF PADUA	4	0.053
UNIVERSITY OF PISA	4	0.053
UNIVERSITY OF PLYMOUTH	4	0.053
UNIVERSITY OF PUNJAB	4	0.053
UNIVERSITY OF REGENSBURG	4	0.053
UNIVERSITY OF SASSARI	4	0.053
UNIVERSITY OF SURREY	4	0.053
UNIVERSITY OF TEXAS HEALTH SCIENCE CENTER HOUSTON	4	0.053
UNIVERSITY OF THE FREE STATE	4	0.053
UNIVERSITY OF ZARAGOZA	4	0.053
US FOOD DRUG ADMINISTRATION FDA	4	0.053
VET HOSP	4	0.053
VET SANS FRONTIERES SUISSE	4	0.053
WESTERN UNIVERSITY UNIVERSITY OF WESTERN ONTARIO	4	0.053
WILD CAMEL PROTECT FDN MONGOLIA	4	0.053
XINJIANG ACAD ANIM SCI	4	0.053
YUNNAN CANC CTR	4	0.053
ZHENGZHOU UNIVERSITY	4	0.053
ZHENGZHOU UNIVERSITY OF LIGHT INDUSTRY	4	0.053
ABU DHABI AGR FOOD SAFETY AUTHOR	3	0.039
ABU DHABI AGR FOOD SAFETY AUTHOR ADAFSA	3	0.039
ADAFSA	3	0.039
ADFCA	3	0.039
AECS	3	0.039
AFYON KOCATEPE UNIVERSITY	3	0.039
AGR ANIM HUSB INTEGRATED SERV CTR YINGGEN SUMU	3	0.039
AL QASIM GREEN UNIVERSITY	3	0.039
AL QUDS UNIV	3	0.039
ALASHAN RIGHT BANNER STN AGR STOCKBREEDING	3	0.039
AMIRI COURT DIAGNOST LAB	3	0.039
AMOL UNIV SPECIAL MODERN TECHNOL	3	0.039
ANHUI CHEST HOSP	3	0.039
ANHUI PROV HOSP	3	0.039
ANKARA UNIVERSITY	3	0.039
ARGONNE NATIONAL LABORATORY	3	0.039
ARIZONA STATE UNIVERSITY	3	0.039
ARTEMIS ONE HLTH	3	0.039
AUBURN UNIVERSITY	3	0.039
AUBURN UNIVERSITY SYSTEM	3	0.039
AUSTRALIAN NATIONAL UNIVERSITY	3	0.039
BANARAS HINDU UNIVERSITY BHU	3	0.039
BANASTHALI VIDYAPITH	3	0.039
BAYBURT UNIVERSITY	3	0.039
BAYERO UNIVERSITY	3	0.039
BIOLOGY CENTRE OF THE CZECH ACADEMY OF SCIENCES	3	0.039
BIRLA INSTITUTE OF TECHNOLOGY SCIENCE PILANI BITS PILANI	3	0.039
BUNDESWEHR INST MICROBIOL	3	0.039
CAMEL BREEDING RES STN	3	0.039
CAMEL PROJECT	3	0.039
CAMELRACING LAB	3	0.039
CHINESE CENTER FOR DISEASE CONTROL PREVENTION	3	0.039
CHONGQING UNIVERSITY	3	0.039
CHONNAM NATIONAL UNIVERSITY	3	0.039
CHOUAIB DOUKKALI UNIVERSITY OF EL JADIDA	3	0.039
CNRS INSTITUTE FOR HUMANITIES SOCIAL SCIENCES INSHS	3	0.039
CNRS INSTITUTE OF ECOLOGY ENVIRONMENT INEE	3	0.039
CNRS NATIONAL INSTITUTE FOR EARTH SCIENCES ASTRONOMY INSU	3	0.039
COLL VET MED	3	0.039
COLL VET MED ANIM RESOURCES	3	0.039
COMMISS BIOTECHNOL GENET ENGN	3	0.039
CRIA GENESIS	3	0.039
CSIC CENTRO NACIONAL DE BIOTECNOLOGIA CNB	3	0.039
CSIC INSTITUTO DE INVESTIGACION EN RECURSOS CINEGETICOS IREC	3	0.039
CTR TROP VET MED	3	0.039
DEFENCE INSTITUTE OF HIGH ALTITUDE RESEARCH DIHAR	3	0.039
DEFENCE RESEARCH DEVELOPMENT ORGANISATION DRDO	3	0.039
DETACHMENT ALXA LEAGUE AGR ANIM HUSB COMPREHENS	3	0.039
DILLA UNIVERSITY	3	0.039
DIRECTORATE ANIM HLTH LIVESTOCK DEV	3	0.039
DIWAN ROYAL COURT	3	0.039
DUBAI CAMEL HOSP	3	0.039
E AFRICAN VET RES ORG	3	0.039
EAST CHINA UNIVERSITY OF SCIENCE TECHNOLOGY	3	0.039
EBERHARD KARLS UNIVERSITY HOSPITAL	3	0.039
ECOTONE WILDLIFE VET SERV	3	0.039
EL FATEH UNIV	3	0.039
EMIRATES IND CAMEL MILK PROD EICMP	3	0.039
ERNST MORITZ ARNDT UNIVERSITAT GREIFSWALD	3	0.039
ETHIOPIAN PUBL HLTH INST	3	0.039
EUROPEAN CAMEL RES SOC	3	0.039
FAC VET MED HAMA	3	0.039
FACULTE DE MEDECINE DE TUNIS FMT	3	0.039
FAO CAMEL PROJECT UTF SAU 044 SAU	3	0.039
FIRAT UNIVERSITY	3	0.039
FLATIRON INST	3	0.039
FST SETTAT	3	0.039
GENET ENGN BIOTECHNOL RES INST	3	0.039
GEORGIA INSTITUTE OF TECHNOLOGY	3	0.039
GERMAN INST TROP SUBTROP AGR DITSL	3	0.039
GORGAN UNIV AGR SCI NAT RESOURCES	3	0.039
GOVT PUNJAB	3	0.039
GOVT YUKON	3	0.039
HAFR ALBATIN UNIVERSITY	3	0.039
HANOVER SCH VET MED	3	0.039
HEBEI NORTH UNIVERSITY	3	0.039
HENRY DOORLY ZOO	3	0.039
HIGH FOOD IND SCH TUNISIA	3	0.039
HOSPITAL CLINIC DE BARCELONA	3	0.039
HUNAN UNIVERSITY	3	0.039
HUNGARIAN ACADEMY OF SCIENCES	3	0.039
HUNGARIAN CENTRE FOR AGRICULTURAL RESEARCH	3	0.039
HUNGARIAN VETERINARY MEDICAL RESEARCH INSTITUTE	3	0.039
ICREA	3	0.039
IDIBAPS	3	0.039
INDIANA UNIVERSITY SYSTEM	3	0.039
INSTITUTE OF GENETICS DEVELOPMENTAL BIOLOGY CAS	3	0.039
INSTITUTE OF QUALITY STANDARDS TESTING TECHNOLOGY FOR AGRO PRODUCTS CAAS	3	0.039
INSTITUTE OF ZOOLOGY CAS	3	0.039
INTERNATIONAL ATOMIC ENERGY AGENCY	3	0.039
INTERNATIONAL BUSINESS MACHINES IBM	3	0.039
INTERNATIONAL ISLAMIC UNIVERSITY MALAYSIA	3	0.039
IWATE UNIVERSITY	3	0.039
JAMIA MILLIA ISLAMIA	3	0.039
JENNER INSTITUTE	3	0.039
JIANGSU ACADEMY OF AGRICULTURAL SCIENCES	3	0.039
JOHNSON JOHNSON	3	0.039
KALMYK STATE UNIVERSITY	3	0.039
KARL MARX UNIVERSITY	3	0.039
KAROLINSKA UNIVERSITY HOSPITAL	3	0.039
KAZAKH SCI RES INST ANIM BREEDING FORAGE PROD	3	0.039
KENYA AGR LIVESTOCK RES ORG KALRO	3	0.039
KENYA TRYPANOSOMIASIS RES INST KETRI	3	0.039
KENYA WILDLIFE SERV	3	0.039
KHWAJA FAREED UNIVERSITY OF ENGINEERING INFORMATION TECHNOLOGY PAKISTAN	3	0.039
KING SAUDI UNIV	3	0.039
KITASATO UNIVERSITY	3	0.039
KONKUK UNIVERSITY	3	0.039
KORKYT ATA KYZYLORDA UNIVERSITY	3	0.039
KUWAIT INSTITUTE FOR SCIENTIFIC RESEARCH	3	0.039
LANDESBETRIEB HESS LANDESLABOR	3	0.039
LASBELA UNIVERSITY OF AGRICULTURAL WATER MARINE SCIENCE	3	0.039
LEIBNIZ INSTITUT FUR EVOLUTIONS UND BIODIVERSITATSFORSCHUNG	3	0.039
LEIDEN UNIVERSITY MEDICAL CENTER LUMC	3	0.039
LINYI CANC HOSP	3	0.039
LOUGHBOROUGH UNIVERSITY	3	0.039
LOYOLA UNIVERSITY CHICAGO	3	0.039
MAGNA GRAECIA UNIVERSITY OF CATANZARO	3	0.039
MASARYK UNIVERSITY BRNO	3	0.039
MAX PLANCK INST SCI HUMAN HIST	3	0.039
MINIST AGR LAND RECLAMAT	3	0.039
MINIST NATL DEF	3	0.039
MINIST SCI TECHNOL	3	0.039
MINISTRY OF NATURE ENVIRONMENT TOURISM MONGOLIA	3	0.039
MOTHER DAIRY	3	0.039
MPALA RES CTR	3	0.039
MRC	3	0.039
MUSEO CAMPO MAJORERO	3	0.039
NATIONAL COMMISSION FOR WILDLIFE CONSERVATION DEVELOPMENT SAUDI ARABIA	3	0.039
NEVADA SYSTEM OF HIGHER EDUCATION NSHE	3	0.039
NEWCASTLE UNIVERSITY UK	3	0.039
NIGEB	3	0.039
NINGXIA UNIVERSITY	3	0.039
NORTHERN JIANGSU PEOPLES HOSP	3	0.039
NORTHWEST NORMAL UNIVERSITY CHINA	3	0.039
OKAYAMA UNIVERSITY	3	0.039
PAKISTAN INSTITUTE OF ENGINEERING APPLIED SCIENCE	3	0.039
PCSIR LABORATORIES COMPLEX	3	0.039
PENNSYLVANIA STATE UNIVERSITY	3	0.039
PHILIPPS UNIVERSITY MARBURG	3	0.039
PSL RESEARCH UNIVERSITY PARIS	3	0.039
QIMR BERGHOFER MEDICAL RESEARCH INSTITUTE	3	0.039
REG UNIV FORUM CAPAC BLDG AGR RUFORUM	3	0.039
REG VET RES LAB	3	0.039
RES CTR AGR NAT RESOURCES	3	0.039
ROYAL BRISBANE WOMEN S HOSPITAL	3	0.039
RUSSIAN STATE AGRARIAN UNIVERSITY MOSCOW TIMIRYAZEV AGRICULTURAL ACADEMY	3	0.039
SABZBAVARAN E NOUANDISH	3	0.039
SANAA UNIV	3	0.039
SAUDI WILDLIFE AUTHOR	3	0.039
SD AGR UNIV	3	0.039
SDAU	3	0.039
SHAANXI PROV CANC HOSP	3	0.039
SHANDONG ACADEMY OF AGRICULTURAL SCIENCES	3	0.039
SHANDONG FIRST MEDICAL UNIVERSITY SHANDONG ACADEMY OF MEDICAL SCIENCES	3	0.039
SHER E KASHMIR UNIVERSITY OF AGRICULTURAL SCIENCES TECHNOLOGY OF KASHMIR SKUAST KASHMIR	3	0.039
SICHUAN PROV CANC HOSP	3	0.039
SIDI MOHAMED BEN ABDELLAH UNIVERSITY OF FEZ	3	0.039
SMS DIAGNOST	3	0.039
SOUTH CHINA AGRICULTURAL UNIVERSITY	3	0.039
SOUTHEAST UNIVERSITY CHINA	3	0.039
SOUTHERN FEDERAL UNIVERSITY	3	0.039
ST LOUIS ZOO	3	0.039
ST LOUIS ZOO INST CONSERVAT MED	3	0.039
SWISS TROPICAL PUBLIC HEALTH INSTITUTE	3	0.039
TARIM UNIVERSITY	3	0.039
TBA	3	0.039
TEL AVIV SOURASKY MEDICAL CENTER	3	0.039
TEXAS CHRISTIAN UNIVERSITY	3	0.039
TEXAS STATE UNIVERSITY SYSTEM	3	0.039
UK CENTRE FOR ECOLOGY HYDROLOGY UKCEH	3	0.039
ULUDAG UNIVERSITY	3	0.039
UNESCO	3	0.039
UNICANCER	3	0.039
UNIV ABUJA	3	0.039
UNIV HARGEISA	3	0.039
UNIV JIROFT	3	0.039
UNIV ZABOL	3	0.039
UNIVERSIDAD DE CASTILLA LA MANCHA	3	0.039
UNIVERSIDADE DO PORTO	3	0.039
UNIVERSIDADE NOVA DE LISBOA	3	0.039
UNIVERSITA DI MODENA E REGGIO EMILIA	3	0.039
UNIVERSITAT ROVIRA I VIRGILI	3	0.039
UNIVERSITE CATHOLIQUE LOUVAIN	3	0.039
UNIVERSITE CONSTANTINE	3	0.039
UNIVERSITE DE DJELFA	3	0.039
UNIVERSITE DE RENNES 1	3	0.039
UNIVERSITE DE TOURS	3	0.039
UNIVERSITE FEDERALE TOULOUSE MIDI PYRENEES COMUE	3	0.039
UNIVERSITE LIBRE DE BRUXELLES	3	0.039
UNIVERSITY OF BASRAH	3	0.039
UNIVERSITY OF BIRJAND	3	0.039
UNIVERSITY OF CALIFORNIA IRVINE	3	0.039
UNIVERSITY OF DELAWARE	3	0.039
UNIVERSITY OF ERLANGEN NUREMBERG	3	0.039
UNIVERSITY OF FREIBURG	3	0.039
UNIVERSITY OF GOTHENBURG	3	0.039
UNIVERSITY OF HAMBURG	3	0.039
UNIVERSITY OF ILLINOIS CHICAGO	3	0.039
UNIVERSITY OF ILLINOIS CHICAGO HOSPITAL	3	0.039
UNIVERSITY OF IOANNINA	3	0.039
UNIVERSITY OF JOS	3	0.039
UNIVERSITY OF KENT	3	0.039
UNIVERSITY OF LIMPOPO	3	0.039
UNIVERSITY OF MASSACHUSETTS BOSTON	3	0.039
UNIVERSITY OF MOSUL	3	0.039
UNIVERSITY OF NAPLES FEDERICO II	3	0.039
UNIVERSITY OF NATURAL RESOURCES LIFE SCIENCES VIENNA	3	0.039
UNIVERSITY OF NEW SOUTH WALES SYDNEY	3	0.039
UNIVERSITY OF NORTH CAROLINA CHAPEL HILL	3	0.039
UNIVERSITY OF OKLAHOMA NORMAN	3	0.039
UNIVERSITY OF OKLAHOMA SYSTEM	3	0.039
UNIVERSITY OF PECS	3	0.039
UNIVERSITY OF POTSDAM	3	0.039
UNIVERSITY OF QUEBEC	3	0.039
UNIVERSITY OF SHEFFIELD	3	0.039
UNIVERSITY OF SINDH	3	0.039
UNIVERSITY OF SOUTH AUSTRALIA	3	0.039
UNIVERSITY OF SOUTH BOHEMIA CESKE BUDEJOVICE	3	0.039
UNIVERSITY OF SOUTHERN CALIFORNIA	3	0.039
UNIVERSITY OF THE WESTERN CAPE	3	0.039
UNIVERSITY OF UDINE	3	0.039
UNIVERSITY OF UTAH	3	0.039
UNIVERSITY OF VETERINARY MEDICINE BUDAPEST	3	0.039
UNIVERSITY OF WARWICK	3	0.039
UNIVERSITY OF WASHINGTON	3	0.039
UNIVERSITY OF WASHINGTON SEATTLE	3	0.039
UNIVERSITY OF WITWATERSRAND	3	0.039
UNIVERSITY SYSTEM OF MARYLAND	3	0.039
US CTR DIS CONTROL PREVENT	3	0.039
VET SERV	3	0.039
XINJIANG AGRICULTURAL UNIVERSITY	3	0.039
YAMAGUCHI UNIVERSITY	3	0.039
ZABOL UNIV	3	0.039
ZAYED UNIVERSITY	3	0.039
ABATTOIR CENT	2	0.026
ABDELMALEK ESSAADI UNIVERSITY OF TETOUAN	2	0.026
ABDUL WALI KHAN UNIVERSITY	2	0.026
ABU DHABI MOUNTED POLICE	2	0.026
ACADEMIC CENTER FOR EDUCATION CULTURE RESEARCH ACECR	2	0.026
ACADEMY OF MILITARY MEDICAL SCIENCES CHINA	2	0.026
ADEKUNLE AJASIN UNIV	2	0.026
AFRICAN UNION AU	2	0.026
AGENCY FOR SCIENCE TECHNOLOGY RESEARCH ASTAR	2	0.026
AGR BIOTECHNOL RES INST IRAN	2	0.026
AGR RES EDUC EXTENS ORG	2	0.026
AGR RES EDUC EXTENS ORG AREO	2	0.026
AGR SCI NAT RESOURCES UNIV KHUZESTAN	2	0.026
AGRICULTURAL UNIVERSITY OF ATHENS	2	0.026
AGRICULTURAL UNIVERSITY PESHAWAR	2	0.026
AGRIJAHAD ORG	2	0.026
AGROSUP DIJON	2	0.026
AHFAD UNIV WOMEN	2	0.026
AICHI INST TECHNOL	2	0.026
AIRLANGGA UNIVERSITY	2	0.026
AJMAN UNIV	2	0.026
AL AIN VET LAB	2	0.026
AL FARABI UNIV	2	0.026
AL MUTHANNA UNIVERSITY	2	0.026
AL NEELAIN UNIV	2	0.026
AL QATTARA VET LAB	2	0.026
ALCOHOL POLICY CONSULTAT	2	0.026
ALEXANDRU IOAN CUZA UNIVERSITY	2	0.026
AMBO UNIVERSITY	2	0.026
ANDREWS UNIVERSITY	2	0.026
ANHUI NORMAL UNIVERSITY	2	0.026
ANIM DIS PREVENT CONTROL CTR ALXA LEFT BANNER	2	0.026
ANIM HUSB BUR NORTH URAD	2	0.026
ANIM RES CTR	2	0.026
ANIM RESOURCES RES CORP ARRC	2	0.026
ANIMAL HEALTH TRUST	2	0.026
ARIZONA STATE UNIVERSITY TEMPE	2	0.026
ASHARQIAH UNIV	2	0.026
ASSISTANCE PUBLIQUE HOPITAUX DE MARSEILLE	2	0.026
ASSISTANCE PUBLIQUE HOPITAUX PARIS APHP	2	0.026
AUGUSTA UNIVERSITY	2	0.026
AUTONOMOUS UNIVERSITY OF MADRID	2	0.026
BADR UNIVERSITY IN CAIRO	2	0.026
BAR ILAN UNIVERSITY	2	0.026
BAY PATH COLL	2	0.026
BAYLOR UNIVERSITY	2	0.026
BEIJING GENOMICS INSTITUTE BGI	2	0.026
BEIJING INSTITUTE OF GENOMICS CAS	2	0.026
BIOPHARMA	2	0.026
BLEKINGE INSTITUTE TECHNOLOGY	2	0.026
BMT BIOMOL THERAPEUT GMBH	2	0.026
BOWMANVILLE ZOOL PK	2	0.026
BROWN UNIVERSITY	2	0.026
CADI AYYAD UNIVERSITY OF MARRAKECH	2	0.026
CALIFORNIA STATE UNIVERSITY EAST BAY	2	0.026
CAMEL BREEDING RES STN RAKH MAHNI	2	0.026
CAMEL CTR	2	0.026
CAMEL PROJECT CTR	2	0.026
CAMEL PROJECT UTF SAU 044 SAU	2	0.026
CAMEL RACING LAB	2	0.026
CAMEL RES PROJECT	2	0.026
CANADIAN FOOD INSPECTION AGENCY	2	0.026
CARDIFF UNIVERSITY	2	0.026
CARNEGIE MELLON UNIVERSITY	2	0.026
CATALAN INSTITUTE OF HUMAN PALEO ECOLOGY SOCIAL EVOLUTION IPHES	2	0.026
CATHOLIC UNIVERSITY OF EASTERN AFRICA	2	0.026
CEITEC VFU	2	0.026
CENT AGR UNIV	2	0.026
CENT VET RES INST	2	0.026
CENT VET RES LAB CVRL	2	0.026
CENTRAL SOUTH UNIVERSITY	2	0.026
CENTRE DE DEVELOPPEMENT DES ENERGIES RENOUVELABLES	2	0.026
CENTRE NATIONAL DES SCIENCES TECHNOLOGIES NUCLEAIRES	2	0.026
CHAIM SHEBA MEDICAL CENTER	2	0.026
CHARLES STURT UNIVERSITY	2	0.026
CHEMBIO DIAGNOST SYST INC	2	0.026
CHINA CONSTRUCTION BANK	2	0.026
CHINA MEDICAL UNIVERSITY	2	0.026
CHINESE ACADEMY OF INSPECTION QUARANTINE	2	0.026
CHINESE ACADEMY OF MEDICAL SCIENCES PEKING UNION MEDICAL COLLEGE	2	0.026
CHRISTCHURCH HOSPITAL NEW ZEALAND	2	0.026
CHUNG SHAN INSTITUTE OF SCIENCE TECHNOLOGY	2	0.026
CIBERNED	2	0.026
CLIN ALERGIA SAO JOAQUIM	2	0.026
CNERV	2	0.026
CNRS INSTITUTE FOR ENGINEERING SYSTEMS SCIENCES INSIS	2	0.026
CNRS INSTITUTE OF CHEMISTRY INC	2	0.026
COLL SCI	2	0.026
COLL SCI HUMANITIES QUWIAYA	2	0.026
COLLEGE DE FRANCE	2	0.026
COLLEGE OF NEW JERSEY	2	0.026
COLORADO COLLEGE	2	0.026
COMMISSARIAT REG DEV AGR TATAOUINE	2	0.026
COMSATS UNIVERSITY ISLAMABAD CUI	2	0.026
CONSEJO NACIONAL DE INVESTIGACIONES CIENTIFICAS Y TECNICAS CONICET	2	0.026
CONSIGLIO NAZIONALE DELLE RICERCHE CNR	2	0.026
CRVL	2	0.026
CSIC INSTITUTO DE PRODUCTOS LACTEOS DE ASTURIAS IPLA	2	0.026
CSIC MUSEO NACIONAL DE CIENCIAS NATURALES MNCN	2	0.026
CSIR CENTRAL DRUG RESEARCH INSTITUTE CDRI	2	0.026
CTR ASTROPHYS HARVARD SMITHSONIAN	2	0.026
CTR EXCELLENCE APPLICAT MODERN TECHNOL PRODUCING	2	0.026
CTR EXCELLENCE BIOTECHNOL RES	2	0.026
CTR NATL ELEVAGE RECH VET	2	0.026
CTR RECH SCI TECH REG ARIDES CRSTRA	2	0.026
CVRL	2	0.026
DAMASCUS UNIV	2	0.026
DANTIWADA AGR UNIV	2	0.026
DE MONTFORT UNIVERSITY	2	0.026
DENVER ZOOL FDN	2	0.026
DEPT BACTERIAL VACCINES PROD	2	0.026
DEPT LIVESTOCK DAIRY DEV	2	0.026
DEPT PHARM TOXICOL BIOCHIM	2	0.026
DEPT PRESIDENTS AFFAIRS	2	0.026
DIRECTORATE GEN VET SERV	2	0.026
DIRECTORATE VET SERV	2	0.026
DONGGUK UNIVERSITY	2	0.026
DUBAI HOSPITAL	2	0.026
DUNGER COLLEGE	2	0.026
ECOLE DES HAUTES ETUDES EN SCIENCES SOCIALES EHESS	2	0.026
EGE UNIVERSITY	2	0.026
EICMP	2	0.026
ELECTRONICS TELECOMMUNICATIONS RESEARCH INSTITUTE KOREA ETRI	2	0.026
ESCUELA SUPER POLITECN CHIMBORAZO	2	0.026
ETHIOPIAN BIODIVERS INST	2	0.026
EUROPEAN CENTRE FOR DISEASE PREVENTION CONTROL	2	0.026
FAC AGR	2	0.026
FLINDERS MEDICAL CENTRE	2	0.026
FRED HUTCHINSON CANCER CENTER	2	0.026
GAU	2	0.026
GAZI UNIVERSITY	2	0.026
GCSAR	2	0.026
GEORGETOWN UNIVERSITY	2	0.026
GEORGIA SOUTHERN UNIVERSITY	2	0.026
GLOBAL CTR MASS GATHERINGS MED	2	0.026
GOVIND BALLABH PANT UNIVERSITY OF AGRICULTURE TECHNOLOGY	2	0.026
GOVT ARTS SCI COLL	2	0.026
GOVT MEERA GIRLS COLL	2	0.026
GOVT VET HOSP	2	0.026
GUJARAT BIOTECHNOL RES CTR	2	0.026
GWANGJU INSTITUTE OF SCIENCE TECHNOLOGY GIST	2	0.026
HAMAD GENERAL HOSPITAL	2	0.026
HARBIN INSTITUTE OF TECHNOLOGY	2	0.026
HARBIN MED UNIV CANC HOSP	2	0.026
HARBIN MEDICAL UNIVERSITY	2	0.026
HARBIN VETERINARY RESEARCH INSTITUTE CAAS	2	0.026
HASSAN II INST AGRON VET MED	2	0.026
HEF FDN	2	0.026
HELMHOLTZ CENTER MUNICH GERMAN RESEARCH CENTER FOR ENVIRONMENTAL HEALTH	2	0.026
HH CROWN PRINCE SHEIKH KHALIFA BIN ZAYED	2	0.026
HH SHEIKH KHALIFA SCI CTR RACING CAMELS	2	0.026
HIGHER INST AGR SCI CHOTT MARIEM	2	0.026
HILLEL YAFFE MED CTR	2	0.026
HLTH AUTHOR ABU DHABI	2	0.026
HLTH FOOD SCI PRECINCT	2	0.026
HONG KONG POLYTECHNIC UNIVERSITY	2	0.026
HOPITAL FATTOUMA BOURGUIBA	2	0.026
HOSP GB GRASSI	2	0.026
HUAZHONG UNIVERSITY OF SCIENCE TECHNOLOGY	2	0.026
HUBEI CANC HOSP	2	0.026
IAV	2	0.026
IBC	2	0.026
IBN SINA UNIVERSITY HOSPITAL CENTER OF RABAT	2	0.026
IBN ZOHR UNIVERSITY OF AGADIR	2	0.026
INDIAN COUNCIL OF MEDICAL RESEARCH ICMR	2	0.026
INDIANA UNIVERSITY BLOOMINGTON	2	0.026
INJE UNIVERSITY	2	0.026
INNER MONGOLIA AGR UNIV	2	0.026
INNER MONGOLIA CAMEL RES INST	2	0.026
INNER MONGOLIA NORMAL UNIVERSITY	2	0.026
INST AGRON	2	0.026
INST ANIM HUSB VET SCI	2	0.026
INST PEND VET CONTROL	2	0.026
INST PRIMATE RES	2	0.026
INST RABAT	2	0.026
INST SUPER TECH MED ISTM BUKAVU	2	0.026
INSTITUT NATIONAL DES SCIENCES APPLIQUEES DE TOULOUSE	2	0.026
INSTITUT PASTEUR CAMBODIA	2	0.026
INSTITUTE FOR ADVANCED STUDY USA	2	0.026
INSTITUTE OF BIOPHYSICS CAS	2	0.026
INSTITUTE OF CELL BIOPHYSICS RAS	2	0.026
INSTITUTE OF CYTOLOGY GENETICS ICG SB RAS	2	0.026
INSTITUTE OF GENE BIOLOGY IGB OF RUSSIAN ACADEMY OF SCIENCES	2	0.026
INSTITUTE OF MODERN PHYSICS CAS	2	0.026
INT LIVESTOCK RES CTR	2	0.026
IRAN UNIVERSITY OF MEDICAL SCIENCES	2	0.026
IRANIAN RES ORG SCI TECHNOL	2	0.026
IROST	2	0.026
ISTANBUL UNIVERSITY	2	0.026
ISTITUTO PER IL SISTEMA PRODUZIONE ANIMALE IN AMBIENTE MEDITERRANEO ISPAAM CNR	2	0.026
ISTITUTO SUPERIORE DI SANITA ISS	2	0.026
ITMO UNIVERSITY	2	0.026
IZS SICILIA	2	0.026
JAMIA HAMDARD UNIVERSITY	2	0.026
JAU	2	0.026
JIANGSU HENGRUI PHARMACEUT CO LTD	2	0.026
JIANGXI CANC HOSP	2	0.026
JOHN TOOHEY CHAMBERS	2	0.026
JOHNS HOPKINS MEDICINE	2	0.026
JORDAN CO ANTIBODY PROD MONOJO	2	0.026
K G RAZUMOVSKY MOSCOW STATE UNIVERSITY OF TECHNOLOGIES MANAGEMENT THE FIRST COSSACK UNIVERSITY	2	0.026
KAPOSVAR UNIVERSITY	2	0.026
KASTAMONU UNIVERSITY	2	0.026
KAZAKH NATL AL FARABI UNIV	2	0.026
KAZAKH RESEARCH INSTITUTE FOR LIVESTOCK FODDER PRODUCTION	2	0.026
KENYA MINIST HLTH	2	0.026
KETRI	2	0.026
KING ABDULLAH UNIVERSITY OF SCIENCE TECHNOLOGY	2	0.026
KING FAHAD HOSP HUFOF	2	0.026
KING FAHD UNIVERSITY OF PETROLEUM MINERALS	2	0.026
KING GEORGE S MEDICAL UNIVERSITY	2	0.026
KING KHALID MIL ACAD	2	0.026
KING SAUD MEDICAL CITY	2	0.026
KING SAUD UNIV	2	0.026
KONKUK UNIVERSITY MEDICAL CENTER	2	0.026
KOREA ADVANCED INSTITUTE OF SCIENCE TECHNOLOGY KAIST	2	0.026
KYUNG HEE UNIVERSITY	2	0.026
L N GUMILYOV EURASIAN NATIONAL UNIVERSITY	2	0.026
LAB CENT VET	2	0.026
LAB CENT VET MALI	2	0.026
LAB PLANT PHYSIOL RES	2	0.026
LAB RECH VET ZOOTECH FARCHA	2	0.026
LASBELA UNIV AGR WATER MARINE SCI	2	0.026
LEAGUE PASTORAL PEOPLES ENDOGENOUS LIVESTOCK DE	2	0.026
LEHIGH UNIVERSITY	2	0.026
LEIBNIZ INSTITUT FUR ZOO UND WILDTIERFORSCHUNG	2	0.026
LINKOPING UNIVERSITY	2	0.026
LIVESTOCK FIELD INVEST STN	2	0.026
LIVESTOCK HLTH RES INST	2	0.026
LJ MEM HOSP	2	0.026
LOMONOSOV MOSCOW STATE UNIVERSITY	2	0.026
LUCKNOW UNIVERSITY	2	0.026
LUDWIG BOLTZMANN INSTITUTE	2	0.026
MAASTRICHT UNIVERSITY	2	0.026
MACCABI HLTH SERV	2	0.026
MACHAKOS UNIV	2	0.026
MACQUARIE UNIVERSITY	2	0.026
MAHASARAKHAM UNIVERSITY	2	0.026
MANAGEMENT SCI CTR PRESIDENTIAL CAMELS	2	0.026
MARCHE POLYTECHNIC UNIVERSITY	2	0.026
MARTIN LUTHER UNIVERSITY HALLE WITTENBERG	2	0.026
MAWLANA BHASHANI SCI TECHNOL UNIV	2	0.026
MAYO CLINIC	2	0.026
MAZANDARAN UNIVERSITY MEDICAL SCIENCES	2	0.026
MEDICAL UNIVERSITY OF SOUTH CAROLINA	2	0.026
MENDEL UNIVERSITY IN BRNO	2	0.026
METROPOLITAN CORP	2	0.026
MIL HOSP INSTRUCT TUNIS	2	0.026
MINIST AGR DEV RURAL	2	0.026
MINIST AGR JAHAD	2	0.026
MINIST CLIMATE CHANGE ENVIRONM	2	0.026
MINIST ENVIRONM WATER AGR MEWA	2	0.026
MINIST HIGHER EDUC SCI RES	2	0.026
MINIST JAHAD E AGR	2	0.026
MINIST JAHAD E KESHAVARZI	2	0.026
MINIST JIHAD AGR	2	0.026
MINIST MUNICIPAL ENVIRONM	2	0.026
MINIST SCI COMMUN	2	0.026
MINIST TOURISM ANTIQU	2	0.026
MINISTRY OF FOOD AGRICULTURE LIVESTOCK TURKEY	2	0.026
MINISTRY OF HEALTH BAHRAIN	2	0.026
MINISTRY OF NATIONAL GUARD HEALTH AFFAIRS	2	0.026
MISR INTERNATIONAL UNIVERSITY	2	0.026
MISR UNIVERSITY FOR SCIENCE TECHNOLOGY	2	0.026
MOHAMMED FIRST UNIVERSITY OF OUJDA	2	0.026
MOI UNIVERSITY	2	0.026
MONASH UNIVERSITY	2	0.026
NANCHANG CTR DIS CONTROL PREVENT	2	0.026
NANJING NORMAL UNIVERSITY	2	0.026
NASA GODDARD SPACE FLIGHT CENTER	2	0.026
NAT HIST MUSEUM BASEL	2	0.026
NATIONAL ACADEMY OF SCIENCES OF THE REPUBLIC OF KAZAKHSTAN	2	0.026
NATIONAL AGRI FOOD BIOTECHNOLOGY INSTITUTE NABI	2	0.026
NATIONAL CENTRAL UNIVERSITY	2	0.026
NATIONAL CHUNG CHENG UNIVERSITY	2	0.026
NATIONAL DONG HWA UNIVERSITY	2	0.026
NATIONAL INSTITUTE OF ADVANCED INDUSTRIAL SCIENCE TECHNOLOGY AIST	2	0.026
NATL AGR RES ORG	2	0.026
NATL CTR ENERGY SCI NUCL TECH	2	0.026
NATL FORESTRY GRASSLAND ADM	2	0.026
NATL HIGH SCH VET MED	2	0.026
NATL INST GENET ENGN BIOTECHNOL	2	0.026
NATL UNIV SOMALIA	2	0.026
NAZARBAYEV UNIVERSITY	2	0.026
NCR	2	0.026
NIH FOGARTY INTERNATIONAL CENTER FIC	2	0.026
NIH NATIONAL CANCER INSTITUTE NCI	2	0.026
NIHON UNIVERSITY	2	0.026
NIZO FOOD RESEARCH	2	0.026
NODCAR	2	0.026
NORTH CAROLINA A T STATE UNIVERSITY	2	0.026
NORTH DAKOTA STATE UNIVERSITY FARGO	2	0.026
NORTH EASTERN HILL UNIVERSITY	2	0.026
NORTHERN TERRITORY GOVERNMENT	2	0.026
NOVOSIBIRSK STATE UNIVERSITY	2	0.026
NVL	2	0.026
NYALA VET RES LAB	2	0.026
NYUGAT MAGYARORSZAGI EGYET	2	0.026
OAK RIDGE INSTITUTE FOR SCIENCE EDUCATION	2	0.026
OBAFEMI AWOLOWO UNIVERSITY	2	0.026
OFF ELEVAGE PATURAGES	2	0.026
OFF NATL RECH DEV ELEVAGE ONARDEL	2	0.026
OFF NATL SECUR SANIT ALIMENTS	2	0.026
OL MAISOR FARM	2	0.026
ONG KARKARA	2	0.026
PEKING UNION MEDICAL COLLEGE	2	0.026
PENNSYLVANIA STATE SYSTEM OF HIGHER EDUCATION PASSHE	2	0.026
PENNSYLVANIA STATE UNIVERSITY UNIVERSITY PARK	2	0.026
PFIZER	2	0.026
POINT BLUE CONSERVAT SCI	2	0.026
PONDICHERRY CTR BIOL SCI EDUC TRUST	2	0.026
PRESIDENTIAL CAMELS CAMEL RACING AFFAIRS	2	0.026
PRINCE SATTAM BIN ABDULAZIZ UNIVERSITY	2	0.026
PRIVATE VET CLIN	2	0.026
PROBIEN CONICET UNCO	2	0.026
PUBLIC HEALTH AGENCY OF CANADA	2	0.026
QINGHAI UNIVERSITY	2	0.026
QUAID I AZAM UNIVERSITY	2	0.026
QUEENS UNIVERSITY CANADA	2	0.026
QUEENSLAND GOVT	2	0.026
RADBOUD UNIVERSITY NIJMEGEN	2	0.026
RADRC	2	0.026
RAZI SERUM VACCINE RES INST	2	0.026
REFIK SAYDAM HIFZISSIHHA MERKEZI BASKANLIGI	2	0.026
REGIONAL CENTRE FOR BIOTECHNOLOGY	2	0.026
REPROLIFE	2	0.026
RES INST TROP MED	2	0.026
ROCKEFELLER UNIVERSITY	2	0.026
ROSKILDE UNIVERSITY	2	0.026
ROSWELL PARK CANCER INSTITUTE	2	0.026
ROYAL BELGIAN INSTITUTE OF NATURAL SCIENCES	2	0.026
ROYAL COLLEGE OF SURGEONS OF ENGLAND	2	0.026
ROYAL NETHERLANDS ACADEMY OF ARTS SCIENCES	2	0.026
RSPCA AUSTRALIA	2	0.026
RUPRECHT KARLS UNIVERSITY HEIDELBERG	2	0.026
RURAL SOLUT SA	2	0.026
RUTGERS STATE UNIVERSITY MEDICAL CENTER	2	0.026
SAAD SPECIALIST HOSPITAL	2	0.026
SAIFIA SCI COLL	2	0.026
SAKEN SEIFULLIN KAZAKH AGROTECHNICAL UNIVERSITY	2	0.026
SAMARA UNIV	2	0.026
SAN DIEGO STATE UNIVERSITY	2	0.026
SAN JOSE STATE UNIVERSITY	2	0.026
SARDAR VALLABHBHAI PATEL UNIVERSITY OF AGRICULTURE TECHNOLOGY	2	0.026
SAUDI ELECTRONIC UNIVERSITY	2	0.026
SAUDI FOOD DRUG AUTHOR	2	0.026
SAUDI SOC CAMEL STUDIES	2	0.026
SCH VET MED	2	0.026
SCI CTR RACING CAMELS	2	0.026
SCRIPPS INSTITUTION OF OCEANOGRAPHY	2	0.026
SENCKENBERG GESELLSCHAFT FUR NATURFORSCHUNG SGN	2	0.026
SEOUL NATIONAL UNIVERSITY SNU	2	0.026
SERBIAN ACADEMY OF SCIENCES ARTS	2	0.026
SEVENTH OF APRIL UNIVERSITY	2	0.026
SHAANXI UNIVERSITY OF SCIENCE TECHNOLOGY	2	0.026
SHAHEED BENAZIR BHUTTO UNIV VET ANIM SCI	2	0.026
SHAHID RAJAEE TEACHER TRAINING UNIVERSITY SRTTU	2	0.026
SHAHREKORD AZAD UNIV	2	0.026
SHAHROUD UNIVERSITY MEDICAL SCIENCES	2	0.026
SHEIKH TECH VET SCH	2	0.026
SICHUAN UNIVERSITY	2	0.026
SIDI MOHAMED BEN ABEDALLAH UNIV	2	0.026
SILICONFORM GMBH	2	0.026
SOC ALIMENTS BETAIL	2	0.026
SOKOINE UNIVERSITY OF AGRICULTURE	2	0.026
SOOCHOW UNIVERSITY CHINA	2	0.026
SOUTH AFRICAN ASTRONOMICAL OBSERVATORY	2	0.026
SOUTH WEST RES DEV INST ANIM BREEDING PLANT G	2	0.026
SOUTH WEST SCI RES INST ANIM HUSB PLANT GROWING	2	0.026
ST LOUIS ZOOL PK	2	0.026
TAIZHOU HOSP ZHEJIANG PROV	2	0.026
TARONGA ZOO	2	0.026
TASHKENT STATE TECHNICAL UNIVERSITY	2	0.026
TAWAM HOSP	2	0.026
TEAGASC	2	0.026
TECHNICAL UNIVERSITY OF MOMBASA	2	0.026
TELIDJI AMAR UNIV	2	0.026
TEXAS TECH UNIVERSITY	2	0.026
TEXAS TECH UNIVERSITY SYSTEM	2	0.026
THAKSIN UNIVERSITY	2	0.026
THAMAR UNIV	2	0.026
THE INSTITUTE OF REMOTE SENSING DIGITAL EARTH CAS	2	0.026
TIANJIN MEDICAL UNIVERSITY	2	0.026
TIANJIN UNIVERSITY OF TRADITIONAL CHINESE MEDICINE	2	0.026
TIERARZTL HSCH HANOVER	2	0.026
TILAD VET CTR	2	0.026
TOKYO METROPOLITAN UNIVERSITY	2	0.026
TOKYO UNIVERSITY OF AGRICULTURE TECHNOLOGY	2	0.026
TRENT UNIVERSITY	2	0.026
TSINGHUA UNIVERSITY	2	0.026
TUNISIAN VET SCH MED	2	0.026
ULM UNIVERSITY	2	0.026
UNITED ARAB EMIRATES UNIV	2	0.026
UNITED STATES DEPARTMENT OF THE INTERIOR	2	0.026
UNIV AHMED BEN BELLA ORAN 1	2	0.026
UNIV FALLUJAH	2	0.026
UNIV GHARDAIA	2	0.026
UNIV LEON ULE	2	0.026
UNIV MALAKAND	2	0.026
UNIV NEYSHABUR	2	0.026
UNIV ORAN 1 AHMED BEN BELLA	2	0.026
UNIV ORAN 1 AHMED BENBELLA	2	0.026
UNIV SOKOTO	2	0.026
UNIVERSIDAD DE LA RIOJA	2	0.026
UNIVERSIDADE DE SANTIAGO DE COMPOSTELA	2	0.026
UNIVERSIDADE DE VIGO	2	0.026
UNIVERSIDADE FEDERAL DA BAHIA	2	0.026
UNIVERSIDADE FEDERAL DO RIO GRANDE DO SUL	2	0.026
UNIVERSITAT KASSEL	2	0.026
UNIVERSITE ABDELHAMID IBN BADIS DE MOSTAGANEM	2	0.026
UNIVERSITE D EL TARF	2	0.026
UNIVERSITE DE BORDEAUX	2	0.026
UNIVERSITE DE BOURGOGNE	2	0.026
UNIVERSITE DE FRANCHE COMTE	2	0.026
UNIVERSITE DE KAIROUAN	2	0.026
UNIVERSITE DE POITIERS	2	0.026
UNIVERSITE DE TUNIS	2	0.026
UNIVERSITE DES SCIENCES ET DE LA TECHNOLOGIE D ORAN MOHAMED BOUDIAF	2	0.026
UNIVERSITY COLLEGE LONDON HOSPITALS NHS FOUNDATION TRUST	2	0.026
UNIVERSITY OF ALASKA ANCHORAGE	2	0.026
UNIVERSITY OF ALASKA SYSTEM	2	0.026
UNIVERSITY OF ARKANSAS FAYETTEVILLE	2	0.026
UNIVERSITY OF ARKANSAS SYSTEM	2	0.026
UNIVERSITY OF BISHA	2	0.026
UNIVERSITY OF CALGARY	2	0.026
UNIVERSITY OF CALIFORNIA RIVERSIDE	2	0.026
UNIVERSITY OF CANBERRA	2	0.026
UNIVERSITY OF CENTRAL FLORIDA	2	0.026
UNIVERSITY OF CENTRAL LANCASHIRE	2	0.026
UNIVERSITY OF COLORADO ANSCHUTZ MEDICAL CAMPUS	2	0.026
UNIVERSITY OF COLORADO BOULDER	2	0.026
UNIVERSITY OF DELHI	2	0.026
UNIVERSITY OF GDANSK	2	0.026
UNIVERSITY OF GONDAR	2	0.026
UNIVERSITY OF GRANADA	2	0.026
UNIVERSITY OF GRONINGEN	2	0.026
UNIVERSITY OF HAIFA	2	0.026
UNIVERSITY OF HAWAII MANOA	2	0.026
UNIVERSITY OF HAWAII SYSTEM	2	0.026
UNIVERSITY OF KASHMIR	2	0.026
UNIVERSITY OF KERBALA	2	0.026
UNIVERSITY OF KIEL	2	0.026
UNIVERSITY OF KONSTANZ	2	0.026
UNIVERSITY OF LAUSANNE	2	0.026
UNIVERSITY OF LJUBLJANA	2	0.026
UNIVERSITY OF MARYLAND BALTIMORE	2	0.026
UNIVERSITY OF MASSACHUSETTS AMHERST	2	0.026
UNIVERSITY OF MIAMI	2	0.026
UNIVERSITY OF NEUCHATEL	2	0.026
UNIVERSITY OF NEVADA LAS VEGAS	2	0.026
UNIVERSITY OF NIGERIA	2	0.026
UNIVERSITY OF OTTAWA	2	0.026
UNIVERSITY OF SALENTO	2	0.026
UNIVERSITY OF SARAJEVO	2	0.026
UNIVERSITY OF SCIENCE TECHNOLOGY BANNU	2	0.026
UNIVERSITY OF SEVILLA	2	0.026
UNIVERSITY OF ST ANDREWS	2	0.026
UNIVERSITY OF SUSSEX	2	0.026
UNIVERSITY OF TASMANIA	2	0.026
UNIVERSITY OF TEXAS HEALTH SAN ANTONIO	2	0.026
UNIVERSITY OF THE WEST INDIES	2	0.026
UNIVERSITY OF TRAS OS MONTES ALTO DOURO	2	0.026
UNIVERSITY OF VIRGINIA	2	0.026
UNIVERSITY OF WEST HUNGARY	2	0.026
UNIVERSITY OF ZAGREB	2	0.026
VACSERA	2	0.026
VAXA SVERIGE	2	0.026
VELLORE INSTITUTE OF TECHNOLOGY	2	0.026
VET ADM BUR BAYANNUR CITY	2	0.026
VET BUR ALXA LEFT BANNER	2	0.026
VET ORG	2	0.026
VET ORG YAZD PROV	2	0.026
VET RES LABS	2	0.026
VETERINARY LABORATORIES AGENCY	2	0.026
VI LENIN ELECT ENGN INST	2	0.026
VIETNAM NATIONAL UNIVERSITY HOCHIMINH CITY	2	0.026
VILAS PK ZOO	2	0.026
VLAAMS INTERUNIV INST BIOTECHNOL	2	0.026
VRIJE UNIVERSITEIT AMSTERDAM	2	0.026
WAKE FOREST UNIVERSITY	2	0.026
WASHINGTON UNIVERSITY WUSTL	2	0.026
WASIT UNIVERSITY	2	0.026
WELLESLEY COLLEGE	2	0.026
WESTERN WASHINGTON UNIVERSITY	2	0.026
WILDLIFE STEPPE ASSOC	2	0.026
WILLIAMS COLLEGE	2	0.026
WOLAITA SODO UNIV	2	0.026
WORLD HEALTH ORGANIZATION EGYPT	2	0.026
XI AN UNIVERSITY OF TECHNOLOGY	2	0.026
XILINGOL VOCAT COLL	2	0.026
XINJIANG BACTRIAN CAMEL RES INST	2	0.026
XINJIANG MEDICAL UNIVERSITY	2	0.026
XINJIANG NORMAL UNIVERSITY	2	0.026
YAZD DAR AL ELM HIGHER EDUC INST	2	0.026
YESHIVA UNIVERSITY	2	0.026
YORK UNIVERSITY CANADA	2	0.026
YUNNAN UNIVERSITY	2	0.026
ZAHEDAN UNIVERSITY OF MEDICAL SCIENCES	2	0.026
ZHEJIANG CANCER HOSPITAL	2	0.026
5 GYRES INST	1	0.013
57357 CHILDRENS CANC HOSP	1	0.013
7 OCTOBER UNIV	1	0.013
A M COLL	1	0.013
A O U CITTA DELLA SALUTE E DELLA SCIENZA DI TORINO	1	0.013
A SHARQIYAH UNIV	1	0.013
AAU	1	0.013
ABDUL WALI KHAN UNIV	1	0.013
ABERYSTWYTH UNIVERSITY	1	0.013
ABIA STATE UNIV	1	0.013
ABOUBAKR BELKAID TLEMCEN UNIV	1	0.013
ABRAR UNIV	1	0.013
ABRII	1	0.013
ABU DHABI AUTHOR CULTURE HERITAGE	1	0.013
ABU DHABI FOOD CONTROL AUTHOR AFDCA	1	0.013
ABU DHABI FORENS SCI LAB	1	0.013
ABU DHABI HLTH AUTHOR	1	0.013
ABU DHABI POLICE GEN DIRECTORATE	1	0.013
ACAD SCI REPUBL UZBEKISTAN	1	0.013
ACAD SCI RES TECHNOL ASRT	1	0.013
ACADEMY OF SCIENTIFIC INNOVATIVE RESEARCH ACSIR	1	0.013
ACHVA ACAD COLL	1	0.013
ADAMAWA COLL AGR	1	0.013
ADM BUR DUNHUANG XIHU NATL NAT RESERVE	1	0.013
ADM BUR XINJIANG LOP NUR WILD CAMEL NATL NAT RESE	1	0.013
ADM DRUG INSTRUMENT SUPERVIS INSPECT	1	0.013
ADV SCI GRP	1	0.013
ADV SCI GRP LLC	1	0.013
ADVENTURE WORLD	1	0.013
ADVERTISING AGE	1	0.013
AF ACAD	1	0.013
AFRICA 70 INT NONGOVT ORG	1	0.013
AGAPLES DIAKONIEKLINIKUM ROTENBURG GGMBH	1	0.013
AGR AFFAIRS FISH RESOURCES AUTHOR	1	0.013
AGR ANIM HUSB ACAD INNER MONGOLIA	1	0.013
AGR ANIM HUSB INTEGRATED SERV CTR	1	0.013
AGR BIOTECHNOL RES INST IRAN ABRII	1	0.013
AGR EDUC EXTENS RES ORG	1	0.013
AGR EXPT STN	1	0.013
AGR NAT RESOURCES RAMIN KHUZESTAN UNIV	1	0.013
AGR RES CTR	1	0.013
AGR RES CTR INT DEV CIRAD EMVT	1	0.013
AGR RES ORG	1	0.013
AGRICULTURAL RESEARCH COUNCIL OF SOUTH AFRICA	1	0.013
AGRICULTURE GENOMES INSTITUTE AT SHENZHEN CAAS	1	0.013
AGRON VET INST	1	0.013
AGRON VET INST IAV HASSAN II	1	0.013
AGTHIA PUBL JOINT STOCK CO PJSC GRP CO	1	0.013
AHMED BEN BELLA ORAN 1 UNIV	1	0.013
AHRI	1	0.013
AHVAZ JUNDISHAPUR UNIVERSITY OF MEDICAL SCIENCES AJUMS	1	0.013
AHWAZ MED SCI UNIV	1	0.013
AITKHOZHIN INSTITUTE OF MOLECULAR BIOLOGY BIOCHEMISTRY	1	0.013
AKLI MOHAND OULHADJ UNIV	1	0.013
AL ADHID AGR SERV	1	0.013
AL ADHID VET SERV	1	0.013
AL AHSA MUNICIPAL	1	0.013
AL AIN CITY MUNICIPAL	1	0.013
AL AIN FARMS LIVESTOCK PROD	1	0.013
AL AIN LAB	1	0.013
AL BAATH UNIV	1	0.013
AL DAHRA AGR CO	1	0.013
AL FAISAL UNIV	1	0.013
AL FATEH UNIV MED SCI	1	0.013
AL HAMAD VET SERV	1	0.013
AL HUSSEIN BIN TALAL UNIVERSITY	1	0.013
AL JALILA CHILDRENS HOSP	1	0.013
AL KHARJ AGR PROJECT	1	0.013
AL MAKTOUM COLL	1	0.013
AL MAYYA GRP	1	0.013
AL MERGEB UNIV	1	0.013
AL MUGHTARIBEEN UNIV	1	0.013
AL NAHRAIN UNIVERSITY	1	0.013
AL RAJHI CO AGR	1	0.013
AL RAWABI DAIRY CO	1	0.013
AL WATANIA AGR CO	1	0.013
AL WATHBA STABLES	1	0.013
ALABAMA A M UNIVERSITY	1	0.013
ALBANY COLLEGE OF PHARMACY HEALTH SCIENCES	1	0.013
ALBERT EINSTEIN COLLEGE OF MEDICINE	1	0.013
ALBORZ UNIV MED SCI	1	0.013
ALBOSHRA MED SUPPLY CO	1	0.013
ALCATEL LUCENT	1	0.013
ALCOR PETR INSTRUMENTS INC	1	0.013
ALERE	1	0.013
ALEXANDRIA UNIV	1	0.013
ALGHAD INT COLL APPL MED SCI	1	0.013
ALIOUNE DIOP UNIV	1	0.013
ALJUFAIRI DIAGNOST THERAPEUT HOSP	1	0.013
ALL RUSSIAN RES INST BREEDING WORK	1	0.013
ALL RUSSIAN RES INST DAIRY IND	1	0.013
ALMUGHTARIBEEN UNIV	1	0.013
ALXA LEAGUE INST ANIM HLTH SUPERVIS	1	0.013
ALXA LEAGUE INST ANIM HUSB	1	0.013
AMBEDKAR UNIVERSITY DELHI	1	0.013
AMER ACAD SCH PSYCHOL	1	0.013
AMER BOARD VET TOXICOL	1	0.013
AMER ENTERPRISE INST	1	0.013
AMER LEGACY FDN	1	0.013
AMER MANAGEMENT ASSOC	1	0.013
AMERICAN UNIVERSITY	1	0.013
AMERICAN UNIVERSITY CAIRO	1	0.013
AMERICAN UNIVERSITY OF BEIRUT	1	0.013
AMERICAN UNIVERSITY OF SHARJAH	1	0.013
AMIRI COURT LAB	1	0.013
AMIRI HOSPITAL	1	0.013
AMIRKABIR UNIVERSITY OF TECHNOLOGY	1	0.013
AMSTERDAM MED COLL	1	0.013
AMSTERDAM UNIV MED CTR	1	0.013
AN NAJAH NATIONAL UNIVERSITY	1	0.013
ANAMBRA STATE UNIV TECHNOL	1	0.013
ANCARE NZ	1	0.013
ANCHALWANCHI COLONY	1	0.013
ANCIENT ARTWORLD	1	0.013
ANHUI ACADEMY OF AGRICULTURAL SCIENCES	1	0.013
ANHUI MEDICAL UNIVERSITY	1	0.013
ANIM ANGELS	1	0.013
ANIM BREEDING CANTER IRAN	1	0.013
ANIM DIS PREVENT CONTROL CTR URAD BACK BANNER	1	0.013
ANIM HLTH IND TRAINING INST	1	0.013
ANIM HLTH RES CORP	1	0.013
ANIM HLTH RES CTR	1	0.013
ANIM HLTH SERV	1	0.013
ANIM HUSB BUR OTOG	1	0.013
ANIM HUSB INST SHILIINGOL AIMAG	1	0.013
ANIM HUSB WORKSTAT WEST SUNID	1	0.013
ANIM HUSB WORKSTN AGR ANIM HUSB BUR BAYANNUR CI	1	0.013
ANIM HUSB WORKSTN EAST SUNID	1	0.013
ANIM HUSB WORKSTN SHILIINGOL AIMAG	1	0.013
ANIM HUSB WORKSTN WEST SUNID	1	0.013
ANIM PLANT QUARANTINE AGCY	1	0.013
ANIM PROD RES INST APRI	1	0.013
ANIM QUARANTINE SERV	1	0.013
ANIM RAHAT	1	0.013
ANIM RES INST	1	0.013
ANIM RESOURCES ADM	1	0.013
ANIM SCI INST LIVESTOCK	1	0.013
ANIM SCI RES INST IRAN	1	0.013
ANIM SCI RES INST IRAN ASRI	1	0.013
ANIM SUPERVIS STN AGR ANIM HUSB INTEGRATED SERV	1	0.013
ANNAMALAI UNIVERSITY	1	0.013
ANNAPOLIS ANIM HOSP	1	0.013
ANNORD GENE TECHNOL BEIJING CO LTD	1	0.013
ANSES FOUGERES	1	0.013
ANTAGONIS BIOTHERAPEUT GMBH	1	0.013
ANTIBODY ENGN BIOTECHNOL RES INST	1	0.013
ANTIDOPING LAB QATAR	1	0.013
ANTIGEN CO	1	0.013
ANTIMICROBIAL RESISTANCE RES CTR	1	0.013
AOU POLICLINICO GAETANO MARTINO	1	0.013
APPL SCI PRIVATE UNIV	1	0.013
APS COLONY	1	0.013
ARAB CTR STUDIES ARID ZONES DRY LANDS	1	0.013
ARAB CTR STUDIES ARID ZONES DRY LANDS ACSAD	1	0.013
ARAB REPUB EGYPTS ARMY	1	0.013
ARASCO R D DEPT	1	0.013
ARID LAND INST IRA	1	0.013
ARIGNAR ANNA ZOOL PK	1	0.013
ARISTOTLE UNIVERSITY OF THESSALONIKI	1	0.013
ARMED FORCES COLLEGE OF MEDICINE AFCM	1	0.013
ARMENIAN NATIONAL AGRARIAN UNIVERSITY	1	0.013
ARRI	1	0.013
ARSI UNIV	1	0.013
ARZNEIMITTEL GMBH	1	0.013
ASAHIKAWA MEDICAL COLLEGE	1	0.013
ASFENDIYAROV KAZAKH NATIONAL MEDICAL UNIVERSITY	1	0.013
ASHARQIYAH UNIV	1	0.013
ASRII	1	0.013
ASSOC VET ELEVEURS MILLAVOIS MAISON AGR	1	0.013
ASSOSA UNIV	1	0.013
ASTANA MEDICAL UNIVERSITY	1	0.013
ATARCHANDAGANA SUU LTD CO	1	0.013
ATOM ENERGY COMMISS SYRIA	1	0.013
ATOM ENERGY COMMISS SYRIA AECS	1	0.013
AUIBAR	1	0.013
AUSNUTRIA DAIRY CHINA CO LTD	1	0.013
AUSNUTRIA HYPROCA NUTR CO LTD	1	0.013
AUSTRALIAN CAMEL NEWS	1	0.013
AUSVET ANIM HLTH SERV	1	0.013
AUTISM RES TREATMENT CTR	1	0.013
AVEM	1	0.013
AVEM MAISON AGR CAP CRES	1	0.013
AZABU UNIVERSITY	1	0.013
AZAD ISLAM UNIV TABRIZ	1	0.013
AZAD UNIV NARAGH	1	0.013
AZERBAIJAN NATIONAL ACADEMY OF SCIENCES ANAS	1	0.013
BABSON COLLEGE	1	0.013
BACHAKHAN UNIV	1	0.013
BACTRIAN CAMEL INST ALSHA	1	0.013
BACTRIAN CAMEL INST ALXA	1	0.013
BACTRIAN CAMELS INST ALXA LEAGUE	1	0.013
BAHRAIN DEF FORCE ROYAL MED SERV HOSP	1	0.013
BAKER HEART AND DIABETES INSTITUTE	1	0.013
BANAT UNIVERSITY OF AGRICULTURAL SCIENCES VETERINARY MEDICINE	1	0.013
BANCO BICENTENARIO BANCO UNIVERSAL CA	1	0.013
BANKING UNIVERSITY HO CHI MINH CITY	1	0.013
BANNER UNIV MED CTR PHOENIX	1	0.013
BAOJI CENT HOSP	1	0.013
BARANI AGR RES INST	1	0.013
BARCELONA SUPERCOMPUTER CENTER BSC CNS	1	0.013
BARTRIDGE PARTNER	1	0.013
BARTRIDGE PARTNERS BARTRIDGE HOUSE	1	0.013
BARUP SOVEJ	1	0.013
BASAVESHWAR ENGN COLL	1	0.013
BAUCHI STATE COLL AGR	1	0.013
BAYCREST	1	0.013
BAYLOR COLLEGE OF MEDICINE	1	0.013
BEADLE LAKE LARGE ANIM HOSP	1	0.013
BEAUTY TREAT ORGAN COSMET LTD	1	0.013
BEER SHEVA DIST DIRECTOR VET SERV	1	0.013
BEHIRA GOVERNORATE	1	0.013
BEIJING CANC HOSP	1	0.013
BEIJING CHINESE MED HOSP	1	0.013
BEIJING FORESTRY UNIVERSITY	1	0.013
BEIJING GOVT	1	0.013
BEIJING INST BIOTECHNOL	1	0.013
BEIJING INST MICROBIOL EPIDEMIOL	1	0.013
BELFAST CITY HOSPITAL	1	0.013
BENDEL STATE UNIV	1	0.013
BENHA UNIV	1	0.013
BENTLEY COLL	1	0.013
BERLIN UNIV	1	0.013
BETH ISRAEL DEACONESS MEDICAL CENTER	1	0.013
BEYKENT UNIVERSITY	1	0.013
BHARATHIAR UNIVERSITY	1	0.013
BHAUDDIN ZAKARIYA UNIV	1	0.013
BINDER PK ZOO	1	0.013
BINGOL UNIVERSITY	1	0.013
BINZHOU MEDICAL UNIVERSITY	1	0.013
BIOEASY SDN BHD	1	0.013
BIOFABRI SL	1	0.013
BIOINFORMAT SOLUT INC	1	0.013
BIOMED RES ENDSTAGE OBSTRUCT LUNG DIS HANNOVER	1	0.013
BIONOTE INC	1	0.013
BIOPHARM	1	0.013
BIOTECHNOL VET LAB	1	0.013
BIOTECHNOLOGY RESEARCH INSTITUTE CAAS	1	0.013
BIOYONG TECHNOL INC	1	0.013
BIOZYME INC	1	0.013
BIRJAND UNIV MED SCI	1	0.013
BIRLA INST MANAGEMENT TECHNOL	1	0.013
BLADD	1	0.013
BLUE NILE NATL INST COMMUNICABLE DIS	1	0.013
BOEHRINGER INGELHEIM	1	0.013
BOISE STATE UNIVERSITY	1	0.013
BOLOGNINI HOSP	1	0.013
BORDER SECUR FORCE	1	0.013
BOSCH	1	0.013
BOTSWANA COLLEGE OF AGRICULTURE	1	0.013
BOTSWANA UNIV AGR NAT RESOURCE MANGEMENT	1	0.013
BRANDEIS UNIVERSITY	1	0.013
BRAUNSCHWEIG UNIVERSITY OF TECHNOLOGY	1	0.013
BRITISH EMBASSY	1	0.013
BROCK ENVIRONM	1	0.013
BROCK UNIVERSITY	1	0.013
BROOKFIELD ZOO	1	0.013
BRUNEL UNIVERSITY	1	0.013
BRUSSELS FREE UNIV	1	0.013
BSF	1	0.013
BUAN	1	0.013
BUFFALO RES INST	1	0.013
BULAIDA FARMS RAIBAL CO	1	0.013
BULE HORA UNIV	1	0.013
BULENT ECEVIT UNIVERSITY	1	0.013
BUNDELKHAND UNIVERSITY	1	0.013
BUNDESWEHR INST MICROBIOL IMB	1	0.013
BUNDESWEHR MED SERV HEADQUARTERS VI 2	1	0.013
BUR AGR ANIM HUSB	1	0.013
BUR ANIM IND	1	0.013
BUR EPIDEMIOL	1	0.013
BUSHEHR UNIV MED SCI	1	0.013
C NINTI ONE LTD	1	0.013
CALIF ENDOWMENT	1	0.013
CALIFORNIA POLYTECHNIC STATE UNIVERSITY SAN LUIS OBISPO	1	0.013
CALIFORNIA STATE POLYTECHNIC UNIVERSITY HUMBOLDT	1	0.013
CALIFORNIA STATE UNIVERSITY CHICO	1	0.013
CALIFORNIA STATE UNIVERSITY FRESNO	1	0.013
CALIFORNIA STATE UNIVERSITY SACRAMENTO	1	0.013
CALLAGHAN INNOVATION	1	0.013
CAMEL ADV REPROD TECHNOL CTR	1	0.013
CAMEL BIOTECHNOL CTR	1	0.013
CAMEL BREEDING RANGE PROTECT IMPROVEMENT CTR	1	0.013
CAMEL CTR RES	1	0.013
CAMEL EMBRYO TRANSFER LAB	1	0.013
CAMEL HOSP	1	0.013
CAMEL PROJECT CTR AL KHARJ	1	0.013
CAMEL RANGE SPECIES RES STN SOUTH KHORASAN	1	0.013
CAMEL REPRODUCT CTR	1	0.013
CAMEL RES INST	1	0.013
CAMELAIT	1	0.013
CAMELOMANES ASSOC	1	0.013
CAMELRACING FORENS LAB	1	0.013
CAMELRACING FORENS SCI LAB	1	0.013
CAMES	1	0.013
CAMPUS INT BAILLARGUET	1	0.013
CANADIAN ACAD SCI	1	0.013
CANADIAN BLOOD SERVICES	1	0.013
CANADIAN MUSEUM NAT	1	0.013
CANADIAN SCIENCE CENTRE FOR HUMAN ANIMAL HEALTH	1	0.013
CARDIFF METROPOLITAN UNIVERSITY	1	0.013
CARDIFF SCH LAW POLIT	1	0.013
CARDINAL IND	1	0.013
CARDIOL SECT	1	0.013
CARE INT	1	0.013
CARE INT KENYA	1	0.013
CARLETON UNIVERSITY	1	0.013
CARNEGIE MUSEUM	1	0.013
CASHMERE CAMEL HIRE MANUFACTURERS INST	1	0.013
CASPIAN INT SCH MED	1	0.013
CAVENDISH LAB	1	0.013
CEA	1	0.013
CENT ADM VET QUARANTINE EXAMINAT	1	0.013
CENT AGR UNIV I	1	0.013
CENT INST ANIM DIS CONTROL	1	0.013
CENT LAB EVALUAT VET BIOL	1	0.013
CENT LAB RESIDUE ANAL PESTICIDES HEAVY MET FOOD	1	0.013
CENT RANGELANDS DEV PROJECT	1	0.013
CENT VET DIAGNOST LAB	1	0.013
CENT VET HOSP	1	0.013
CENT VET RES LABS CTR	1	0.013
CENTRAL EUROPEAN UNIVERSITY	1	0.013
CENTRAL UNIVERSITY HOSPITAL ASTURIAS	1	0.013
CENTRALE LILLE	1	0.013
CENTRE DE BIOTECHNOLOGIE DE SFAX	1	0.013
CENTRE DE RECHERCHE SCIENTIFIQUE ET TECHNIQUE EN ANALYSES PHYSICO CHIMIQUES	1	0.013
CENTRE UNIVERSITAIRE AIN TEMOUCHENT	1	0.013
CENTRO DE INGENIERIA GENETICA Y BIOTECNOLOGIA	1	0.013
CENTRO NACIONAL DE MICROBIOLOGA CNM	1	0.013
CENTURY HOUSE MUSEUM	1	0.013
CESA BUSINESS SCH COLOMBIA	1	0.013
CEVA SANTE ANIMALE	1	0.013
CHABAHAR GULF MARINE CO	1	0.013
CHAIRMAN LITHUANIAN CHAMBER AGR	1	0.013
CHANGZHI MEDICAL COLLEGE	1	0.013
CHARLES RIVER LABS	1	0.013
CHARLES STURT UNIV	1	0.013
CHEMOTHERAPY TRYPANOSOMIASIS RES PROJECT	1	0.013
CHEMOTRYP PROJECT	1	0.013
CHENGDU ZOO	1	0.013
CHICAGO ZOOL SOC	1	0.013
CHILDREN HOSP INST CHILD HLTH	1	0.013
CHILDREN S HOSPITAL COLORADO	1	0.013
CHINA AGR VET BIO SCI TECHNOL CO LTD	1	0.013
CHINA MONGOLIA JOINT LAB BIOMACROMOL RES	1	0.013
CHINA NATL CTR FOOD SAFETY RISK ASSESSMENT	1	0.013
CHINA NATL TOBACCO CORP	1	0.013
CHINA UNIVERSITY OF GEOSCIENCES	1	0.013
CHINA UNIVERSITY OF MINING TECHNOLOGY	1	0.013
CHINESE ACAD SCI UNIV TOKYO JOINT LAB STRUCT VIRO	1	0.013
CHINESE PEOPLE S LIBERATION ARMY GENERAL HOSPITAL	1	0.013
CHINESE PEOPLES LIBERAT ARMY	1	0.013
CHINESE UNIVERSITY OF HONG KONG	1	0.013
CHITTAGONG VET ANIM SCI UNIV	1	0.013
CHOLISTAN UNIV VET ANIM SCI BAHAWALPUR	1	0.013
CHONGQING UNIVERSITY OF SCIENCE TECHNOLOGY	1	0.013
CHOSUN UNIVERSITY	1	0.013
CHRISTIAN MEDICAL COLLEGE HOSPITAL CMCH VELLORE	1	0.013
CHU BESANCON	1	0.013
CHU DE NANTES	1	0.013
CHU NICE	1	0.013
CHU STRASBOURG	1	0.013
CHULABHORN GRADUATE INSTITUTE	1	0.013
CHULABHORN RESEARCH INSTITUTE	1	0.013
CHULALONGKORN UNIVERSITY	1	0.013
CHUNGBUK NATIONAL UNIVERSITY	1	0.013
CIBA GEIGY SAUDIA ARABIA LTR	1	0.013
CITY SCI RES TECHNOL APPLICAT ALEXANDRIA	1	0.013
CITY UNIVERSITY OF NEW YORK CUNY GRADUATE SCHOOL	1	0.013
CLALIT HEALTH SERVICES	1	0.013
CLEMSON UNIVERSITY	1	0.013
CLEVELAND CLINIC FOUNDATION	1	0.013
CLEVELAND STATE UNIVERSITY	1	0.013
CLIN VET	1	0.013
CLINVET	1	0.013
CMA ININTI STORE	1	0.013
COLL ENGN	1	0.013
COLL FOOD AGR	1	0.013
COLL MED	1	0.013
COLL VET MED BAGHDAD	1	0.013
COLLEGE VET SCI	1	0.013
COLLLEGE MED	1	0.013
COLZYX AB	1	0.013
COMMISSARIAT REG DEV AGR CRDA	1	0.013
COMMISSARIAT REG DEV AGR GABES	1	0.013
COMMISSARIAT REG DEV AGR GAFSA	1	0.013
COMMISSARIAT REG DEV AGR KEBILI	1	0.013
COMMISSARIAT REG DEV AGR MEDENINE	1	0.013
COMMISSARIAT REG DEV AGR SIDI BOUZID	1	0.013
COMMISSARIAT REG DEV AGR TOZEUR	1	0.013
COMMUNAUTE UNIVERSITE GRENOBLE ALPES	1	0.013
COMPLUTENSE UNIVERSITY OF MADRID	1	0.013
CONCORDIA UNIVERSITY CANADA	1	0.013
CONEM SAUDI CHILD BRAIN RES GRP	1	0.013
CONNECTICUT COLLEGE	1	0.013
CONNOVAT RES	1	0.013
CONSELHO NACL PESQUISAS	1	0.013
CONSELLERIA AGR FISHING NOURISHMENT	1	0.013
CONSERVAT GENET IMPROVEMENT CTR	1	0.013
CONSIGLIO PER LA RICERCA IN AGRICOLTURA E L ANALISI DELL ECONOMIA AGRARIA CREA	1	0.013
CONTRAVES	1	0.013
COOPI	1	0.013
COPENHAGEN ZOO	1	0.013
COPPERBELT UNIVERSITY	1	0.013
CORNLL UNIV	1	0.013
CORP PHARMACEUTICAL IND IBN AL BAYTAR	1	0.013
CORVINUS UNIVERSITY BUDAPEST	1	0.013
COUNCIL NUTR ENVIRONM MED CONEM	1	0.013
CRC	1	0.013
CRDA	1	0.013
CROATIAN VETERINARY INSTITUTE ZAGREB	1	0.013
CSIC ESTACION BIOLOGICA DE DONANA EBD	1	0.013
CSIC IESA INSTITUTO DE ESTUDIOS SOCIALES AVANZADOS	1	0.013
CSIC INSTITUCION MILA Y FONTANALS IMF	1	0.013
CSIC INSTITUTO DE FISICA CORPUSCULAR IFIC	1	0.013
CSIC UAM INSTITUTO DE INVESTIGACION EN CIENCIAS DE LA ALIMENTACION CIAL	1	0.013
CSIC UPV INSTITUTO DE TECNOLOGIA QUIMICA ITQ	1	0.013
CSIR CENTRAL LEATHER RESEARCH INSTITUTE CLRI	1	0.013
CTR ANAT	1	0.013
CTR ANIM DIS PREVENT CONTROL	1	0.013
CTR AUSTRALIAN NATL BIODIVERS RES	1	0.013
CTR BIOMED RES	1	0.013
CTR CALIDAD AVICOLA ALIMENTAC COMUNIDAD VALENCI	1	0.013
CTR CIENTIF TECNOL CONICET PATAGONIA CONFLUENCIA	1	0.013
CTR CLIMATE RESILIENCE RES CR2	1	0.013
CTR CULTURAL RESOURCES	1	0.013
CTR DIS CONTROL PREVENT KENYA	1	0.013
CTR DIS PREVENT CONTROL CHINESE PLA	1	0.013
CTR INVEST SANIDAD ANIM	1	0.013
CTR INVEST SANIDAD ANIM INIA	1	0.013
CTR NACL PARASITOL	1	0.013
CTR NATL ENERGIE SCI TECH NUCL	1	0.013
CTR NATL RECH ARCHEOL	1	0.013
CTR NATL RECH SCI TECHNOL	1	0.013
CTR RES AGROPASTORALISM	1	0.013
CTR RIC ZOOTECNIA ACQUACOLTURA CREA ZA	1	0.013
CTR SCI FDN EXPT STUDIES RES	1	0.013
CTR STUDIO ALIMENTAZ ANIMALI PROD ZOOTECN	1	0.013
CTR VET RES LAB	1	0.013
CUBAN HOSP	1	0.013
CULVER ACAD	1	0.013
CURTIN SPRINGS STN	1	0.013
CVRI	1	0.013
CZECH NATL BANK	1	0.013
CZECH RESEARCH INSTITUTE OF ANIMAL SCIENCE	1	0.013
CZECH VETERINARY RESEARCH INSTITUTE	1	0.013
DAIRY DEV DEPT QUETTA	1	0.013
DALHOUSIE UNIVERSITY	1	0.013
DAMGHAN UNIV	1	0.013
DANONE NUTRICIA	1	0.013
DATTA MEGHE INSTITUTE OF MEDICAL SCIENCES DEEMED TO BE UNIVERSITY	1	0.013
DEAKIN UNIVERSITY	1	0.013
DEBRE BERHAN UNIV	1	0.013
DEEN DAYAL UPADHYAYA GORAKHPUR UNIVERSITY	1	0.013
DEENBANDHU CHHOTU RAM UNIVERSITY OF SCIENCE TECHNOLOGY	1	0.013
DENVER HEALTH MEDICAL CENTER	1	0.013
DENVER PUBL HLTH	1	0.013
DEPARTMENT OF AGRICULTURE FOOD WESTERN AUSTRALIA	1	0.013
DEPT ANIM HUSB	1	0.013
DEPT ANIM PROD	1	0.013
DEPT BIOSCI	1	0.013
DEPT ECON DEV JOBS TRANSPORT RESOURCES	1	0.013
DEPT ENVIRONM CONSERVAT	1	0.013
DEPT ENVIRONM WATER NAT RESOURCES	1	0.013
DEPT FOOD SCI BIOTECHNOL	1	0.013
DEPT INFRASTRUCT PLANNING ENVIRONM	1	0.013
DEPT NAT RESOURCES ENVIRONM ARTS SPORT NRETAS	1	0.013
DEPT PARASITOL	1	0.013
DEPT PATHOL	1	0.013
DEPT PATHOL DIAG	1	0.013
DEPT PATHOL SAMPLE MANAGEMENT	1	0.013
DEPT PK WILDLIFE	1	0.013
DEPT PRIMARY IND FISHERIES MINES	1	0.013
DEPT PRIMARY IND RES SOUTH AUSTRALIA	1	0.013
DEPT PSYCHIAT BIOBEHAV SCI	1	0.013
DEPT RECH ZOOTECH VET	1	0.013
DEPT RES DEV	1	0.013
DEPT SHEEP WOOL	1	0.013
DEPT VET MED	1	0.013
DEPT VET MICROBIOL	1	0.013
DEPT VET PUBL HELTH EPIDEMIOL	1	0.013
DEPT VIROL	1	0.013
DESERT MARINE ENVIRONM RES CTR	1	0.013
DESERT WILDLIFE SERV	1	0.013
DEUTSCH GESELL TECH ZUSAMMENARBEIT	1	0.013
DEUTSCH GESELLS TECH ZUSAMMENARBEIT	1	0.013
DEUTSCHES PRIMATENZENTRUM DPZ	1	0.013
DEUTSCHES WOLL FORSCH INST	1	0.013
DEVI AHILYA UNIVERSITY	1	0.013
DEZHOU UNIVERSITY	1	0.013
DIAGEO	1	0.013
DIAGGENE	1	0.013
DIL EV GERMAN INST FOOD TECHNOL	1	0.013
DIRE DAWA UNIV	1	0.013
DIRECT ELEVAGE	1	0.013
DIRECT PROV AGR	1	0.013
DIRECT REG AGR LAAYOUNE BOUJDOUR SAKIA EL HAMR	1	0.013
DIRECTORATE AGR SERV	1	0.013
DIRECTORATE FORENS SCI	1	0.013
DIRECTORATE VET LABS	1	0.013
DIRECTORATE VET MED	1	0.013
DIST BHAKKAR L DD DEPT	1	0.013
DIV VET EXTENS EDUC	1	0.013
DLO	1	0.013
DOANE COLL	1	0.013
DOCTORAL SCH GABES SIS	1	0.013
DOKUZ EYLUL UNIVERSITY	1	0.013
DOW UNIVERSITY OF HEALTH SCIENCES	1	0.013
DR B LAL INST BIOTECHNOL	1	0.013
DR P PIRAINO STAT CONSULTING	1	0.013
DREXEL UNIVERSITY	1	0.013
DUBAI CAMEL BREEDING CTR	1	0.013
DUBAI CTR HOSP	1	0.013
DUBAI EQUINE HOSP	1	0.013
DUBAI HERBAL TREATMENT CTR	1	0.013
DUBAI PHARM COLL	1	0.013
[truncated: 1,656 more rows]
