# Supplementary material for: A century of “Camel Research”: a bibliometric analysis
Source: Front Vet Sci. 2023 Jun 1;10:1157667. doi: 10.3389/fvets.2023.1157667 (PMC10267326; doi:10.3389/fvets.2023.1157667)
Supplement: Supplementary file 2 [file Table_2.XLSX]

## Sheet: Sheet1
	Funding Agencies	Record Count	% of 7,617
1	National Natural Science Foundation Of China Nsfc	137	1.799
2	King Saud University	120	1.575
3	King Faisal University	117	1.5
4	European Commission	97	1.273
5	United States Department Of Health Human Services	74	0.972
6	National Institutes Of Health Nih Usa	67	0.88
7	University Of Tehran	35	0.459
8	Uk Research Innovation Ukri	32	0.42
9	United Arab Emirates University	31	0.407
10	Nih National Institute Of Allergy Infectious Diseases Niaid	29	0.381
11	Indian Council Of Agricultural Research Icar	28	0.368
12	Iran National Science Foundation Insf	27	0.354
13	Australian Government	26	0.341
14	Cgiar	23	0.302
15	National Science Foundation Nsf	23	0.302
16	Austrian Science Fund Fwf	22	0.289
17	Ministry Of Education Culture Sports Science And Technology Japan Mext	20	0.263
18	Biotechnology And Biological Sciences Research Council Bbsrc	16	0.21
19	Higher Education Commission Of Pakistan	16	0.21
20	European Commission Joint Research Centre	15	0.197
21	Deanship Of Scientific Research At King Faisal University	14	0.184
22	Deutscher Akademischer Austausch Dienst Daad	14	0.184
23	Ferdowsi University Of Mashhad	14	0.184
24	German Research Foundation Dfg	14	0.184
25	Medical Research Council Uk Mrc	14	0.184
26	Wellcome Trust	14	0.184
27	King Abdulaziz City For Science And Technology Kacst	13	0.171
28	National Plan For Science Technology And Innovation Maarifah King Abdulaziz City For Science And Technology Kingdom Of Saudi Arabia	13	0.171
29	National Research Centre Nrc	13	0.171
30	Chinese Academy Of Sciences	12	0.158
31	Deanship Of Scientific Research King Faisal University Kingdom Of Saudi Arabia	12	0.158
32	Fundamental Research Funds For The Central Universities	12	0.158
33	Japan Society For The Promotion Of Science	12	0.158
34	United States Agency For International Development Usaid	12	0.158
35	Cooperative Research Centres Crc Programme	11	0.144
36	Deanship Of Scientific Research King Faisal University Saudi Arabia	11	0.144
37	Department Of Industry Innovation And Science	11	0.144
38	Japan Agency For Medical Research And Development Amed	11	0.144
39	Ministry Of Higher Education Scientific Research Mhesr	11	0.144
40	National Key Research And Development Program Of China	11	0.144
41	Ninti One	11	0.144
42	Camel And Range Research Center Crrc	10	0.131
43	Grants In Aid For Scientific Research Kakenhi	10	0.131
44	King Abdulaziz City For Science And Technology	10	0.131
45	Nih National Cancer Institute Nci	10	0.131
46	Science And Technology Development Fund Stdf	10	0.131
47	Taif University Taif Saudi Arabia	10	0.131
48	Department Of Biotechnology Dbt India	9	0.118
49	Federal Ministry Of Education Research Bmbf	9	0.118
50	French Embassy In Tehran	9	0.118
51	Ministry Of Education China	9	0.118
52	Natural Science Foundation Of Jiangsu Province	9	0.118
53	Qassim University Saudi Arabia	9	0.118
54	Spanish Government	9	0.118
55	Center For International Research And Collaboration Ismo	8	0.105
56	Deanship For Scientific Research Qassim University Saudi Arabia	8	0.105
57	Government Of The Republic Of Kazakhstan	8	0.105
58	Inner Mongolia Autonomous Region Science And Technology Innovation Guide Project	8	0.105
59	King Faisal University	8	0.105
60	Ministry Of Education	8	0.105
61	Qassim University	8	0.105
62	Russian Foundation For Basic Research Rfbr	8	0.105
63	State Key Laboratory For Agrobiotechnology Of China	8	0.105
64	Uae University	8	0.105
65	Deanship Of Scientific Research In King Faisal University	7	0.092
66	Deanship Of Scientific Research King Faisal University	7	0.092
67	French Ministry Of Foreign Affairs	7	0.092
68	International Foundation For Science	7	0.092
69	Jordan University Of Science And Technology	7	0.092
70	National Science And Technology Major Project	7	0.092
71	National Science Fund For Talent Training In Basic Science Of China	7	0.092
72	Nih National Institute Of General Medical Sciences Nigms	7	0.092
73	Swiss National Science Foundation Snsf	7	0.092
74	United Arab Emirates University Uaeu	7	0.092
75	Zaabeel Office	7	0.092
76	Alxa League Science And Technology Project In Inner Mongolia	6	0.079
77	Double Class Discipline Innovation Team Building	6	0.079
78	Engineering Physical Sciences Research Council Epsrc	6	0.079
79	European Social Fund Esf	6	0.079
80	Fao	6	0.079
81	French National Research Agency Anr	6	0.079
82	Imi	6	0.079
83	Inner Mongolia Natural Science Foundation	6	0.079
84	Inner Mongolia Natural Science Foundation Project	6	0.079
85	International Atomic Energy Agency	6	0.079
86	Leverhulme Trust	6	0.079
87	Ministry Of Education And Science Of The Republic Of Kazakhstan	6	0.079
88	Moe In China	6	0.079
89	Murdoch University	6	0.079
90	Natural Environment Research Council Nerc	6	0.079
91	Natural Science Foundation Of Gansu Province	6	0.079
92	Natural Sciences And Engineering Research Council Of Canada Nserc	6	0.079
93	Portuguese Foundation For Science And Technology	6	0.079
94	Taif University Saudi Arabia	6	0.079
95	United States Department Of Defense	6	0.079
96	University Of Hong Kong	6	0.079
97	Australian Research Council	5	0.066
98	Centers For Disease Control Prevention Usa	5	0.066
99	Deanship Of Scientific Research At King Faisal University Al Ahsa Saudi Arabia	5	0.066
100	High Level Talents Introduction To Scientific Research Start Up Project	5	0.066
101	International S T Cooperation Program Of China	5	0.066
102	Islamic Azad University	5	0.066
103	King Faisal University Saudi Arabia	5	0.066
104	Ministry Of Higher Education And Scientific Research Of Tunisia	5	0.066
105	Ministry Of Science And Technology Taiwan	5	0.066
106	National Aeronautics Space Administration Nasa	5	0.066
107	National Institute Of Genetic Engineering And Biotechnology Nigeb	5	0.066
108	National International Scientific And Technological Cooperation Project	5	0.066
109	National Key R D Program Of China	5	0.066
110	National Key Technology R D Program	5	0.066
111	Nih National Institute Of Mental Health Nimh	5	0.066
112	Open Foundation Of Chinese Educational Department Key Laboratory Of Arid And Grassland Agroecology	5	0.066
113	Open Foundation Of Chinese Educational Department Key Laboratory Of Magnetics And Magnetic Material	5	0.066
114	Priority Academic Program Development Of Jiangsu Higher Education Institutions Papd	5	0.066
115	Research Council Of The Ferdowsi University Of Mashhad	5	0.066
116	Scientific Research Deanship King Faisal University Kingdom Of Saudi Arabia	5	0.066
117	Shiraz University	5	0.066
118	Sultan Qaboos University	5	0.066
119	Swedish International Development Cooperation Agency Sida	5	0.066
120	Swiss Agency For Development And Cooperation Sdc	5	0.066
121	University Sains Malaysia Rui Grant	5	0.066
122	Addis Ababa University	4	0.053
123	Agricultural Biotechnology Research Institute Of Iran Abrii	4	0.053
124	Animals Angels	4	0.053
125	Centre National De La Recherche Scientifique Cnrs	4	0.053
126	China Postdoctoral Science Foundation	4	0.053
127	Conselho Nacional De Desenvolvimento Cientifico E Tecnologico Cnpq	4	0.053
128	Deanship Of Scientific Research	4	0.053
129	Deanship Of Scientific Research Dsr	4	0.053
130	Department Of Science Technology India	4	0.053
131	Dsr	4	0.053
132	European Union Enpi Joint Operational Programme Of The Mediterranean Basin Ievp Ct	4	0.053
133	Fostering Foundation For The Excellent Ph D Dissertation Of Gansu Agricultural University	4	0.053
134	Grant Agency Of The Czech Republic	4	0.053
135	Indian Council Of Medical Research Icmr	4	0.053
136	Inner Mongolia Agricultural University High Level Talents Research Initiation Fund Project	4	0.053
137	Iranian Ministry Of Science Research And Technology	4	0.053
138	Jiangsu Shuangchuang Program	4	0.053
139	Jiangsu Specially Appointed Professor Project China	4	0.053
140	Jsc Center For International Programs Kazakhstan	4	0.053
141	King Abdulaziz University	4	0.053
142	Laboratory Of Immunology And Molecular Physiology Faculty Of Science Assiut University	4	0.053
143	Major Special Project Of The Inner Mongolia Autonomous Region	4	0.053
144	Ministry Of Science And Higher Education Poland	4	0.053
145	Ministry Of Scientific Research And Technology Of Tunisia	4	0.053
146	National Basic Research Program Of China	4	0.053
147	National Health And Medical Research Council Nhmrc Of Australia	4	0.053
148	Nih National Heart Lung Blood Institute Nhlbi	4	0.053
149	Nih National Institute Of Environmental Health Sciences Niehs	4	0.053
150	Region Pays De La Loire	4	0.053
151	Science Foundation Ireland	4	0.053
152	Scientific Research Foundation For Doctors Of Shanxi Normal University	4	0.053
153	Top Up Assistance Program Scholarship Tuap University Of Queensland	4	0.053
154	Tunisian Ministry Of Higher Education And Scientific Research	4	0.053
155	United Arab Emirates University Uae	4	0.053
156	University Of Sharjah	4	0.053
157	Academic Training Scheme For Institutions Of Higher Education Slai Scholarship Malaysian Government	3	0.039
158	Antigone	3	0.039
159	Ardabil Province	3	0.039
160	Ataturk University	3	0.039
161	Ceitec Central European Institute Of Technology	3	0.039
162	Center Of Excellence In Biothermodynamics Cebiotherm	3	0.039
163	Centrum Of International Migration Cim	3	0.039
164	Consejo Nacional De Investigaciones Cientificas Y Tecnicas Conicet	3	0.039
165	Consultancy Service For Enhancing Laboratory Surveillance Of Emerging Infectious Disease For The Hksar Department Of Health	3	0.039
166	Coordenacao De Aperfeicoamento De Pessoal De Nivel Superior Capes	3	0.039
167	Culs Prague University Internal Grant Agency	3	0.039
168	Cvrl	3	0.039
169	Danish Development Fund Danida	3	0.039
170	Deanship Of Scientific Research At King Khalid University	3	0.039
171	Deanship Of Scientific Research Dsr King Abdulaziz University Jeddah	3	0.039
172	Deanship Of Scientific Research In King Faisal University Saudi Arabia	3	0.039
173	Deanship Of Scientific Research Of King Faisal University	3	0.039
174	Deanship Of Scientific Research Qassim University	3	0.039
175	Deanship Of Scientific Research Vice Presidency For Graduate Studies And Scientific Research King Faisal University Saudi Arabia	3	0.039
176	Defense Advanced Research Projects Agency Darpa	3	0.039
177	Deltas Africa Initiative Grant	3	0.039
178	Deputyship For Research Innovation Ministry Of Education In Saudi Arabia	3	0.039
179	Economic Social Research Council Esrc	3	0.039
180	Enterprise Ireland	3	0.039
181	European Union Fp7 Project Emperie	3	0.039
182	Forensic Science Laboratory	3	0.039
183	Foundation Cellex	3	0.039
184	French Authority	3	0.039
185	German Academic Exchange Services Daad In Sudan	3	0.039
186	Global Challenges Research Fund Gcrf	3	0.039
187	Hamad Bin Khalifa University Hbku	3	0.039
188	Health And Medical Research Fund Food And Health Bureau Government Of The Hong Kong Special Administrative Region	3	0.039
189	High Level Talents Introduce Scientific Research Start Up Project	3	0.039
190	Higher Education And Scientific Research Ministry Of Tunisia	3	0.039
191	Hksar Health And Medical Research Fund	3	0.039
192	Inonu University	3	0.039
193	International Scientific And Technological Cooperation Project Of China	3	0.039
194	Iran Dairy Industry	3	0.039
195	Iran National Elites Foundation Inef	3	0.039
196	Isfahan University Of Technology	3	0.039
197	Islamic Azad University Shahrekord Branch Iran	3	0.039
198	Kaimrc	3	0.039
199	Kenyan Government	3	0.039
200	Key Project Fund Of State Key Laboratory For Agrobiotechnology Of China	3	0.039
201	King Abdul Aziz City For Science And Technology Kacst Basic Research Programs National Transformation Program Under Research And Development Grants Program For National Research Institutions And Centers Gpurc Kingdom Of Saudi Arabia	3	0.039
202	King Abdul Aziz City For Science And Technology Kacst Saudi Arabia	3	0.039
203	King Abdulaziz City For Science And Technology Kacst Riyadh Saudi Arabia	3	0.039
204	King Abdulaziz City For Science And Technology Kacst Saudi Arabia	3	0.039
205	King Abdulaziz City For Science And Technology Saudi Arabia	3	0.039
206	King Abdulaziz University Jeddah Saudi Arabia	3	0.039
207	King Faisal University Deanship Of Scientific Research	3	0.039
208	King Faisal University Kingdom Of Saudi Arabia	3	0.039
209	King Khalid University	3	0.039
210	Laboratoire D Epidemiologie D Infections Enzootiques Des Herbivores En Tunisie	3	0.039
211	Ministere De L Enseignement Superieur Et De La Recherche Scientifique Of Algeria	3	0.039
212	Ministry Of Agriculture Of Tunisia	3	0.039
213	Ministry Of Education Science Technological Development Serbia	3	0.039
214	Ministry Of Health Italy	3	0.039
215	Ministry Of Health Singapore	3	0.039
216	Nanjing Medical University	3	0.039
217	National High Technology Research And Development Program Of China	3	0.039
218	National Key Research And Development Project	3	0.039
219	National Research Foundation Of Korea	3	0.039
220	Natural Science Foundation Of Inner Mongolia	3	0.039
221	Natural Science Foundation Of Jiangsu Higher Education Institutions Of China	3	0.039
222	Natural Science Foundation Of School Of Life Sciences Shanxi Normal University	3	0.039
223	Natural Science Foundation Project Of Inner Mongolia	3	0.039
224	New Partnership For Africa S Development Planning And Coordinating Agency Nepad Agency	3	0.039
225	Nsf Directorate For Biological Sciences Bio	3	0.039
226	Open Funds Of The State Key Laboratory For Chemo Biosensing And Chemometrics	3	0.039
227	Open Project Of The National Laboratory Of Biomacromolecules	3	0.039
228	Princess Nourah Bint Abdulrahman University	3	0.039
229	Projekt Deal	3	0.039
230	Qatar National Library	3	0.039
231	Regional Universities Forum For Capacity Building In Agriculture Ruforum	3	0.039
232	Royal Society Of London	3	0.039
233	Ruler Of Dubai	3	0.039
234	Science And Technology Research And Development Program Of Shaanxi Province China	3	0.039
235	Simons Foundation	3	0.039
236	Sino Africa Joint Research Center	3	0.039
237	Smithsonian Institution	3	0.039
238	Southeast University	3	0.039
239	Strategic Research Theme Fund	3	0.039
240	Swedish Research Council	3	0.039
241	Taif University Researchers Supporting Program	3	0.039
242	Tehran University Of Medical Sciences	3	0.039
243	Tunisian Authority	3	0.039
244	Uk Government	3	0.039
245	Uk S Foreign Commonwealth And Development Office Fcdo	3	0.039
246	United Arab Emirates University Uaeu Program For Advanced Research	3	0.039
247	University Hassan First Morocco	3	0.039
248	World Health Organization	3	0.039
249	Administrative Bureau Of Gansu Annanba Wild Camel National Nature Reserve	2	0.026
250	Administrative Bureau Of Xinjiang Lop Nur Wild Camel National Nature Reserve	2	0.026
251	Africa Centre Of Excellence For Climate Smart Agriculture And Biodiversity Conservation Haramaya University	2	0.026
252	Agricultural Sciences And Natural Resources University Of Khuzestan	2	0.026
253	Alexander Von Humboldt Foundation	2	0.026
254	Algerian Government	2	0.026
255	Algerian Ministry Of High Studies And Scientific Research	2	0.026
256	Animal Breeding Center Of Iran	2	0.026
257	Animal Models Core At Colorado State University	2	0.026
258	Annual Funding Track By The Deanship Of Scientific Research Vice Presidency For Graduate Studies And Scientific Research King Faisal University Al Ahsa Saudi Arabia	2	0.026
259	Apart Fellowship Of The Austrian Academy Of Sciences	2	0.026
260	Assiut University	2	0.026
261	Auezov South Kazakhstan State University	2	0.026
262	Belgian Directorate General For Development Cooperation	2	0.026
263	Biotechnology Research Center Riyadh Saudi Arabia	2	0.026
264	Cairo University	2	0.026
265	Cd Phrg Grant	2	0.026
266	Center Of Excellence For Application Of Modern Technologies For Producing Functional Foods And Drinks	2	0.026
267	Centre For International Migration And Development	2	0.026
268	Centre National Pour La Recherche Scientifique Et Technique Cnrst Of Morocco	2	0.026
269	Centre Of Excellence For Veterinary Research On Iranian Indigenous Animals	2	0.026
270	Ceres Research School Of The Wageningen University The Netherlands	2	0.026
271	China Agriculture Research System	2	0.026
272	Chinese Academy Of Science Presidents International Fellowship Initiative Cas Pifi	2	0.026
273	Chr Hansen A S	2	0.026
274	College Of Medicine Research Center Cmrc King Saud University	2	0.026
275	Council Of Scientific Industrial Research Csir India	2	0.026
276	Dahlem Research School At Freie Universitat Berlin	2	0.026
277	Danish Agency For Research And Innovation	2	0.026
278	Danish International Development Agency Danida Through Haramaya Camel Dairy Project	2	0.026
279	Deanship Of Scientific Research At Jordan University Of Science And Technology	2	0.026
280	Deanship Of Scientific Research At King Faisal University Saudi Arabia	2	0.026
281	Deanship Of Scientific Research At King Saud University Riyadh Saudi Arabia	2	0.026
282	Deanship Of Scientific Research At Princess Nourah Bint Abdulrahman University Through The Fast Track Research Funding Program	2	0.026
283	Deanship Of Scientific Research Dsr At King Abdulaziz University Jeddah	2	0.026
284	Deanship Of Scientific Research King Faisal University Hofuf Alahsa Saudi Arabia	2	0.026
285	Deanship Of Scientific Research King Faisal University Ksa	2	0.026
286	Defence Research Development Organisation Drdo	2	0.026
287	Defense Threat Reduction Agency	2	0.026
288	Department For International Development	2	0.026
289	Deputy Prime Minister Of The U A E	2	0.026
290	Deputyship For Research And Innovation Ministry Of Education In Saudi Arabia	2	0.026
291	Egyptian Academy Of Scientific Research And Technology Asrt	2	0.026
292	Egyptian Spanish Joint Fund	2	0.026
293	Elinor Patterson Baker Trust	2	0.026
294	Emirates Industries For Camel Milk Products Dubai U A E	2	0.026
295	Eranet Ib Program	2	0.026
296	European Union Fp7 Project Antigone	2	0.026
297	European Union Salud Animal En La Tendopoli Sahrawi Algeria	2	0.026
298	European Union Within The Enpi Cbc Med	2	0.026
299	External Cooperation Program Of Cas	2	0.026
300	Faculty Of Medicine Research Grants	2	0.026
301	Faculty Of Science University Of Copenhagen	2	0.026
302	Fao Camel Project	2	0.026
303	Federal Democratic Republic Of Ethiopia	2	0.026
304	Ferdowsi University Of Mashhad Iran	2	0.026
305	Ferdowsi University Of Mashhad Mashhad Iran	2	0.026
306	Food And Agriculture Organization Of The United Nations	2	0.026
307	French Embassy In Riyadh	2	0.026
308	Fundacao De Amparo A Pesquisa Do Estado De Sao Paulo Fapesp	2	0.026
309	Fwo	2	0.026
310	Gansu Hualong Agricultural Development Corporation	2	0.026
311	Gansu Key Laboratory Of Animal Generational Physiology And Reproductive Regulation	2	0.026
312	General Directorate Of Scientific Research And Technological Development Dgrsdt	2	0.026
313	Gerda Henkel Foundation	2	0.026
314	German Egyptian Research Long Term Scholarship Gerls	2	0.026
315	German Ministry Of Economic Cooperation	2	0.026
316	Ghent University Global Campus Belgian Special Research Fund Bof Stg	2	0.026
317	Giles W And Elise G Mead Foundation	2	0.026
318	Government Of Algeria Within The Program National Exceptional Pne	2	0.026
319	Government Of The Republic Of Kenya	2	0.026
320	Guangdong Province Universities And Colleges Pearl River Scholar Funded Scheme 2017	2	0.026
321	Gundishapur Project	2	0.026
322	Hassan Ii Agronomy And Veterinary Medicine Institute Program Prfi Iav	2	0.026
323	Hassan Ii Institute Of Agronomy And Veterinary Medicine Of Rabat Morocco	2	0.026
324	Hawassa University	2	0.026
325	Hec	2	0.026
326	Icar National Dairy Research Institute Karnal India	2	0.026
327	Icar National Research Centre On Camel Bikaner India	2	0.026
328	Inner Mongolia Science And Technology Plan	2	0.026
329	Institute Of Biochemistry And Biophysics Ibb	2	0.026
330	International Project Ca Ra Va N Toward A Camel Transnational Value Chain	2	0.026
331	International Scientific Studies Collaboration Cissc Ministry Of Science Research And Technology In Iran	2	0.026
332	Intramural Research Program Of The National Institute Of Allergy And Infectious Diseases Niaid National Institutes Of Health Nih	2	0.026
333	Israel Science Foundation	2	0.026
334	Italian National Reference Centre For Toxoplasmosis At The Istituto Zooprofilattico Sperimentale Della Sicilia A Mirri Italy	2	0.026
335	Jigjiga University	2	0.026
336	Kacst Under Nstip Grant	2	0.026
337	Kazakh Scientific Research Institute Of Animal Breeding And Forage Production Jsc	2	0.026
338	Kimball Foundation	2	0.026
339	King Abdul Aziz City For Science And Technology Kacst	2	0.026
340	King Abdul Aziz City For Science And Technology Kacst Basic Research Programs National Transformation Program Under Research And Development Grants Program For National Research Institutions And Centres Gpurc Kingdom Of Saudi Arabia	2	0.026
341	King Abdul Aziz City For Science And Technology Kacst Riyadh Ksa	2	0.026
342	King Abdul Aziz City For Science And Technology Riyadh Saudi Arabia	2	0.026
343	King Abdulaziz City For Science And Technology General Directorate Of Research Grants Programs	2	0.026
344	King Abdullah University Of Science Technology	2	0.026
345	King Saud University Deanship Of Scientific Research College Of Food And Agricultural Sciences Research Center	2	0.026
346	Kuwait Institute For Scientific Research Kuwait City Kuwait	2	0.026
347	Labex Resmed	2	0.026
348	Laboratoire D Epidemiologie D Infections Enzootiques Des Herbivores En Tunisie Ministere De L Enseignement Superieur Tunisia	2	0.026
349	Major Project Of Inner Mongolia Autonomous Region Science And Technology	2	0.026
350	Major Projects Of Inner Mongolia Autonomous Region	2	0.026
351	Max Planck Society	2	0.026
352	Minister Of Agriculture Northern State	2	0.026
353	Ministere De L Enseignement Superieur Et De La Recherche Scientique Tunisie	2	0.026
354	Ministere Des Affaires Etrangeres France	2	0.026
355	Ministry Of Agriculture Czech Republic	2	0.026
356	Ministry Of Agriculture Of The Republic Of Kazakhstan	2	0.026
357	Ministry Of Education Universities And Research Miur	2	0.026
358	Ministry Of Education Youth Sports Czech Republic	2	0.026
359	Ministry Of Health Labour And Welfare Japan	2	0.026
360	Ministry Of Higher Education And Scientific Research Republic Of Sudan	2	0.026
361	Ministry Of Jihad E Agriculture	2	0.026
362	Ministry Of Science And Technology China	2	0.026
363	Ministry Of Science And Technology Government Of India	2	0.026
364	Moroccan National Center Of Scientific And Technical Research Cnrst	2	0.026
365	Moroccan Program Proferd Dromadaire	2	0.026
366	National Agricultural Research Fund	2	0.026
367	National Feral Animal Control Program Of The Australian Government S Natural Heritage Trust	2	0.026
368	National Key Research And Development Project Of China	2	0.026
369	National Plan For Science Technology And Innovation Maariffah King Abdulaziz City For Science And Technology Kingdom Of Saudi Arabia	2	0.026
370	National Research Foundation South Africa	2	0.026
371	National Research Fund Nrf Kenya	2	0.026
372	Natural Resources And Environment Research Institute Nreri	2	0.026
373	Natural Science Foundation Of Hubei Province	2	0.026
374	Natural Science Foundation Of Shanxi Normal University	2	0.026
375	Netherlands Government	2	0.026
376	Nih Fogarty International Center Fic	2	0.026
377	Nsf Directorate For Education Human Resources Ehr	2	0.026
378	Organisation Of Jihad E Agriculture	2	0.026
379	Pfizer	2	0.026
380	Phr Ihlb	2	0.026
381	Prad Project	2	0.026
382	Procamed Project Of The European Union Enpi Joint Operational Programme Of The Mediterranean Basin Ievp Ct	2	0.026
383	Project Of High Level Talents Introduce Scientific Research	2	0.026
384	Qassim University Kingdom Of Saudi Arabia	2	0.026
385	Qatar Foundation Qf	2	0.026
386	Qatar National Research Fund	2	0.026
387	Research Council Of Norway	2	0.026
388	Research Council Of Shahid Bahonar University Of Kerman	2	0.026
389	Research Institute For Endocrine Sciences Shahid Beheshti University Of Medical Sciences Ir Iran	2	0.026
390	Saint Louis Zoo Field Research For Conservation Grant	2	0.026
391	School Of Veterinary Medicine	2	0.026
392	Science And Research Branch Islamic Azad University Mashhad Iran	2	0.026
393	Science And Technology Major Project Of Inner Mongolia Autonomous Region	2	0.026
394	Science And Technology Planning Project Of Guangzhou City	2	0.026
395	Scientific And Technical Research Center For Arid Areas Crstra	2	0.026
396	Scientific Research Deanship At University Of Ha Il Saudi Arabia	2	0.026
397	Serbian Academy Of Sciences And Arts	2	0.026
398	Shahid Bahonar University Of Kerman	2	0.026
399	Shahid Chamran University	2	0.026
400	Sida Sarec	2	0.026
401	Smithsonian Tropical Research Institute	2	0.026
402	Spanish National Research Council Csic	2	0.026
403	Spanish State Research Agency Aei	2	0.026
404	Sudan Veterinary Association	2	0.026
405	Sudanese Corporation Of Metrology And Standards Bank Of Animal Resources	2	0.026
406	Swiss Federal Office Of Public Health Division Communicable Disease	2	0.026
407	Taif University Kingdom Of Saudi Arabia	2	0.026
408	Theme Based Research Scheme University Grant Committee	2	0.026
409	Tunisian Ministry Of High Education Scientific Research And Technology	2	0.026
410	Tunisian Ministry Of Scientific Research	2	0.026
411	Turkiye Bilimsel Ve Teknolojik Arastirma Kurumu Tubitak	2	0.026
412	Uae University Through Upar	2	0.026
413	Uaeu	2	0.026
414	Uk S Foreign Commonwealth Development Office Fcdo	2	0.026
415	Unesco Chair On Interdisciplinary Research In Diabetes	2	0.026
416	United Arab Emirates University Through University Program For Advanced Research Upar	2	0.026
417	United Arab Emirates University Upar Al Ain United Arab Emirates	2	0.026
418	United States Department Of Agriculture Usda	2	0.026
419	United States Department Of Homeland Security Dhs	2	0.026
420	United States Public Health Service	2	0.026
421	Universiti Sains Malaysia	2	0.026
422	Universiti Teknologi Mara	2	0.026
423	University Development Fund	2	0.026
424	University Grants Commission India	2	0.026
425	University Of China	2	0.026
426	University Of Cordoba Spain	2	0.026
427	University Of Mohaghegh Ardabili	2	0.026
428	University Of Queensland	2	0.026
429	University Of Relizane	2	0.026
430	University Of Tabriz	2	0.026
431	University Of Zurich	2	0.026
432	Upar	2	0.026
433	Usmanu Danfodiyo University Sokoto Nigeria	2	0.026
434	Vetagro Sup Institute Located In France	2	0.026
435	Volgenau Foundation	2	0.026
436	Wfirst Program	2	0.026
437	Wong Ching Yee Medical Postgraduate Scholarship	2	0.026
438	World Bank Group	2	0.026
439	Yazd Agricultural And Natural Resources Research And Education Center	2	0.026
440	Youth Innovation Promotion Association Cas	2	0.026
441	Zapi Project	2	0.026
442	111 Project From Education Ministry Of China	1	0.013
443	13th Five Year Plan On Fuzhou Marine Economic Innovation And Development Demonstration City Project	1	0.013
444	863 Funds Of The Ministry Of Science And Technology China	1	0.013
445	A D I S U	1	0.013
446	Aberystwyth University Postgraduate Studentship Scheme	1	0.013
447	Abrar University Somalia	1	0.013
448	Abu Dhabi Agriculture And Food Safety Authority	1	0.013
449	Abu Dhabi Agriculture And Food Safety Authority Adafsa	1	0.013
450	Abu Dhabi Food Control Authority Adfca Uae	1	0.013
451	Academic Promotion Plan Of Shandong First Medical University Shandong Academy Of Medical Sciences	1	0.013
452	Academic Senate Council On Research Computing And Libraries At The University Of California Irvine	1	0.013
453	Academic Training Scheme For Institutions Of Higher Education Slai Malaysian Government And Uhiversiti Teknologi Mara	1	0.013
454	Academic Training Scheme For Institutions Of Higher Education Slai Scholarship	1	0.013
455	Academic Training Scheme For Institutions Of Higher Education Slai Scholarship By Malaysian Government	1	0.013
456	Academic Training Scheme For Institutions Of Higher Education Slai Scholarship By Universiti Teknologi Majlis Amanah Rakyat Mara	1	0.013
457	Academic Training Scheme For Institutions Of Higher Education Slai Scholarship Malaysian Government And Universiti Teknologi Mara	1	0.013
458	Academic Training Scheme For Institutions Of Higher Education Slai Scholarship Universiti Teknologi Mara	1	0.013
459	Academy Of Finland	1	0.013
460	Adafsa	1	0.013
461	Administrative Bureau Of Gansu Dunhuang Xihu National Nature Reserve	1	0.013
462	Aecid Agencia Espanola De Cooperacion Internacional Y Desarrollo Of Spain	1	0.013
463	Aecs	1	0.013
464	Afcmp	1	0.013
465	African Academy Of Sciences Aas S Alliance For Accelerating Excellence In Science In Africa Aesa	1	0.013
466	African Centre Of Excellence For Infectious Diseases In Humans And Animals Aceidha At The School Of Veterinary Medicine University Of Zambia	1	0.013
467	African Economics Research Consortium Aerc	1	0.013
468	Agency For Science Technology Research Astar	1	0.013
469	Agricultural And Fisheries Development Fund Afdf Of Ministry Of Agriculture And Fisheries Oman	1	0.013
470	Agricultural And Natural Resources Research And Education Center Of Khorasan Razavi	1	0.013
471	Agricultural Biotechnology Research Institute Of Iran	1	0.013
472	Agricultural Research Center At The College Of Food And Agriculture Sciences King Saud University	1	0.013
473	Agricultural Research Center Of King Saud University	1	0.013
474	Agricultural Research Council Of The College Of Food Science And Agriculture	1	0.013
475	Agricultural Research Education And Extension Organization Areeo	1	0.013
476	Agricultural Research Education And Extension Organization Areeo Karaj Iran	1	0.013
477	Agricultural Science And Technology Innovation Program Beijing China	1	0.013
478	Agricultural Science And Technology Innovation Program Of China	1	0.013
479	Agricultural Scientific And Technological Innovation Project Of The Shandong Academy Of Agricultural Sciences	1	0.013
480	Agriculture And Fisheries Development Fund Afdf Ministry Of Agriculture And Fisheries Sultanate Of Oman	1	0.013
481	Agriculture And Fisheries Development Fund Ministry Of Agriculture And Fisheries Oman	1	0.013
482	Agriculture And Fisheries Developmental Fund Afdf Of Ministry Of Agriculture And Fisheries Sultanate Of Oman	1	0.013
483	Agriculture And Veterinary Research Center At College Of Agriculture And Veterinary Medicine Al Qassim University Saudi Arabia	1	0.013
484	Agriculture And Veterinary Research Centre At College Of Agriculture And Veterinary Medicine	1	0.013
485	Agriculture Research Developing Fund Ardf Egypt	1	0.013
486	Ahfad University For Women Sudan	1	0.013
487	Ahmadu Bello University Zaria Booard Of Research Grant	1	0.013
488	Aicrp	1	0.013
489	Al Qassim University Saudi Arabia	1	0.013
490	Al Qassum University Kingdom Of Saudi Arabia	1	0.013
491	Alashan Desert Industrial Research Institute Project	1	0.013
492	Alcpr On Increased Utilization Of Animal Energy	1	0.013
493	Alexander Von Hombolt Foundation Germany	1	0.013
494	Alfaisal University Internal Research Grant Irg	1	0.013
495	Alimentary Analysis Unit Tunisia	1	0.013
496	Alinytjara Wilurara Nrm Board	1	0.013
497	Aljouf University	1	0.013
498	Alma Mater Studiorum Universita Di Bologna Within The Crui Care Agreement	1	0.013
499	Alneelain University Sudan	1	0.013
500	Alxa Desert Industrial Research Institute Project	1	0.013
501	Alzheimer S Research Uk Aruk	1	0.013
502	Alzheimer S Society	1	0.013
503	American Association For The Advancement Of Science Aaas	1	0.013
504	American Heart Association	1	0.013
505	American Lebanese Syrian Associated Charities Alsac	1	0.013
506	Amol University Of Special Modern Technologies Amol Iran	1	0.013
507	Anangu Pitjantjatjara Yankunytjatjara Land Management	1	0.013
508	Andrs	1	0.013
509	Animal Branch Of The Germplasm Bank Of Wild Species Chinese Academy Of Sciences	1	0.013
510	Animal Genetics And Breeding Unit	1	0.013
511	Animal Health Project Mongolia	1	0.013
512	Animal Nutrition Division Desert Research Center	1	0.013
513	Animal Production Department Faculty Of Agriculture Mansoura University Egypt	1	0.013
514	Animal Production Research Institute	1	0.013
515	Animal Resources Research Center	1	0.013
516	Animal Resources Research Corporation Arrc	1	0.013
517	Animal Science Research Institute	1	0.013
518	Animal Science Research Institute Of Iran Asri	1	0.013
519	Animal Science Research Institute Of Iran Asri Karaj Iran	1	0.013
520	Animals Apos Angels	1	0.013
521	Annette Kade Foundation	1	0.013
522	Annie And Ottos Johs Detlefs Foundations	1	0.013
523	Annual Funding Track By Deanship Of Scientific Research Vice Presidency For Graduate Studies And Scientific Research King Faisal University Al Ahsa Saudi Arabia	1	0.013
524	Anr Ackitec	1	0.013
525	Anr Angiofib	1	0.013
526	Apart Fellowship Austrian Academy Of Science	1	0.013
527	Apart From The Fellowship Austrian Academy Of Sciences	1	0.013
528	Apart Of The Austrian Academy Of Sciences	1	0.013
529	Apulia Region Of Italy	1	0.013
530	Aqua Caliente Sp California	1	0.013
531	Aragonese O Ffice Of Science Technology And University Research	1	0.013
532	Arasco	1	0.013
533	Arboviruses And Viral Hemorrhagic Fever Laboratory	1	0.013
534	Arboviruses And Viral Hemorrhagic Fever Laboratory National Reference Lab Pasteur Institute Tehran Iran	1	0.013
535	Area Of Excellence Scheme Of The Hong Kong University Grants Committee Of The Government Of Hong Kong Special Administrative Region Of The People S Republic Of China	1	0.013
536	Arid And Semi Arid Lands Agricultural Productivity Research Project Asal Aprp	1	0.013
537	Arid Lands Institute Medenine	1	0.013
538	Arisys	1	0.013
539	Arisys Contract Of The Eu	1	0.013
540	Arnold And Mabel Beckman Foundation	1	0.013
541	Ascens Project Eu Fp7 Fet	1	0.013
542	Associated Students Inc At California State University Fresno	1	0.013
543	Association For Frontotemporal Degeneration	1	0.013
544	Association Of African Universities	1	0.013
545	Astip	1	0.013
546	Atomic Energy Commission Of Syria	1	0.013
547	Audio Visual And Culture Executive Agency Of The European Commission Through Project Called Mobility To Enhance Training Of Engineers In Africa Metega	1	0.013
548	Australian Feral Camel Management Project	1	0.013
549	Austrian Federal Ministry Of Agriculture Forestry Environment And Water Management Dafne	1	0.013
550	Austrian Programme For Advanced Research And Technology Fellowship Of The Austrian Academy Of Sciences	1	0.013
551	Autism Research And Treatment Centre	1	0.013
552	Autonomous Community Of Madrid Prompt	1	0.013
553	Axle Tech International Endowed Professorship	1	0.013
554	Backbone Program Of Shanghai Pulmonary Hospital	1	0.013
555	Badr Drugs Company	1	0.013
556	Banaras Hindu University Varanasi India	1	0.013
557	Basic Research Program Crp	1	0.013
558	Basic Science Research Unit Deanship Of Scientific Research At Majmaah University Kingdom Of Saudi Arabia	1	0.013
559	Basic Scientific Independent Research Project Of Qinghai Academy Of Animal Science And Veterinary Medicine	1	0.013
560	Baum Foundation	1	0.013
561	Baxter	1	0.013
562	Bayero University Kano Nigeria	1	0.013
563	Bbsrc Rumen Systems Biology	1	0.013
564	Becanet Bio Science Eastern And Central Africa Net	1	0.013
565	Beijing Forestry University Outstanding Young Talent Cultivation Project	1	0.013
566	Beijing Municipal Archives	1	0.013
567	Beijing Municipal Commission Of Education	1	0.013
568	Beijing Municipal Science And Technology Commission Project	1	0.013
569	Beijing Natural Science Foundation	1	0.013
570	Belgian Cooperation For Development	1	0.013
571	Belgian Development Agency Ctb Fellowship	1	0.013
572	Belgian General Administration For International Cooperation	1	0.013
573	Benny Slome Foundation	1	0.013
574	Bgi Shenzhen South China University Of Technology Renovation Foundation	1	0.013
575	Bic Belgian Development Agency Program	1	0.013
576	Bid Program Of The Spanish Ministry Of Economy And Competitiveness	1	0.013
577	Big Bend National Park Np Texas	1	0.013
578	Big Bend Ranch State Park Sp Texas	1	0.013
579	Bill Melinda Gates Foundation	1	0.013
580	Bils Bioinformatics Infrastructure For Life Sciences	1	0.013
581	Bio Oriented Technology Research Advancement Institution Brain National Agriculture And Food Research Organization Naro Saitama Japan	1	0.013
582	Bio Program Of The Spanish Ministry Of Economy And Competitiveness	1	0.013
583	Biochemistry Department At King Saud University Riyadh Saudi Arabia	1	0.013
584	Biodiversity Conservation South Nretas	1	0.013
585	Biological Resources Programme Chinese Academy Of Sciences	1	0.013
586	Biomedical Research Program Bmrp	1	0.013
587	Bionano Health Guard Research Center Ministry Of Science Ict Future Planning Msip Of South Korea As A Global Frontier Project	1	0.013
588	Biosys Network	1	0.013
589	Biotechnology And Biological Sciences Research Council Swbio Dtp Programme Bbsrc	1	0.013
590	Bipar	1	0.013
591	Birjand University	1	0.013
592	Bluefield Project	1	0.013
593	Borana Zone Livestock Development And Fisher Office	1	0.013
594	Bourg En Bresse Agglomeration France	1	0.013
595	Bowmanville Zoological Park	1	0.013
596	British Council Sudan	1	0.013
597	British Heart Foundation	1	0.013
598	Bu Ali Sina University	1	0.013
599	Bule Hora University Ethiopia	1	0.013
600	Bulent Ecevit University	1	0.013
601	Bulgarian Ministry Of Education And Science	1	0.013
602	Bureau Of Meteorology Australia	1	0.013
603	Bureau Of Rural Sciences	1	0.013
604	Bureau Of Rural Sciences And Rangelands Natural Resource Management	1	0.013
605	Bureau Of Rural Sciences Of The Australian Government	1	0.013
606	Caas	1	0.013
607	Cabin Scheme Of Icar Iasri	1	0.013
608	Caisse Nationale De Securite Sociale De Djibouti Social Security Djibouti	1	0.013
609	Cambridge Africa Alborada Fund	1	0.013
610	Camel And Range Res Center Crrc	1	0.013
611	Camel And Range Research Center	1	0.013
612	Camel And Range Research Center Al Jouf Through The Fao Project	1	0.013
613	Camel And Range Research Centre At Aljouf Saudi Arabia	1	0.013
614	Camel Dairy Unit	1	0.013
615	Camel Milk Co Australia Pty Ltd	1	0.013
616	Camel Project Pmssc Cmp Punjab Pakistan	1	0.013
617	Camel Research Center King Faisal University Al Hasa Kingdom Saudi Arabia	1	0.013
618	Camel Research Center King Faisal University Saudi Arabia	1	0.013
619	Camel Research Centre King Faisal University	1	0.013
620	Camel Research Unit	1	0.013
621	Campus France Imhotep Grant	1	0.013
622	Cams Innovation Fund For Medical Sciences Cifms China	1	0.013
623	Canada First Research Excellence Fund	1	0.013
624	Canada Research Chairs	1	0.013
625	Canadian Association Of Zoos And Aquariums Caza Grant	1	0.013
626	Canadian Authority Centre De Recherche En Infectiologie Porcine Et Aviaire Cripa Fond De Recherche Du Quebec Nature Et Technologie Frqnt	1	0.013
627	Canadian Museum Of Nature	1	0.013
628	Canary Islands Government	1	0.013
629	Carlsberg Foundation	1	0.013
630	Carnegie State Vehicular Recreation Area California	1	0.013
631	Cas In Zoology Banaras Hindu University Varanasi India	1	0.013
632	Catalina Sp Arizona	1	0.013
633	Ccsit College At The King Faisal University	1	0.013
634	Cefas	1	0.013
635	Cefrepa	1	0.013
636	Cefrepa Kuwait	1	0.013
637	Cegba Project University Of Bari Aldo Moro Italy	1	0.013
638	Cenakva Ii	1	0.013
639	Center For Computational Astrophysics At The Flatiron Institute	1	0.013
640	Center For Forestry Research Experimentation Cief	1	0.013
641	Center Of Excellence For Veterinary Research On Iranian Indigenous Domestic Animals Of University Of Tehran	1	0.013
642	Center Of Reproductive Technology	1	0.013
643	Central Asia Drug Research And Development Center Of The Chinese Academy Of Sciences	1	0.013
644	Central Land Council	1	0.013
645	Central University Basic Scientific Research Fee Of Lanzhou University China	1	0.013
646	Central Veterinary Research Centre	1	0.013
647	Central Veterinary Research Laboratory	1	0.013
648	Central Veterinary Research Laboratory Cvrl Animal Resources Research Corporation Arrc	1	0.013
649	Central Veterinary Research Laboratory Of The United Arab Emirates	1	0.013
650	Centre For Animal Breeding Ministry Of Jahad E Agriculture	1	0.013
651	Centre For International Migration And Development Cim	1	0.013
652	Centre For International Migration And Development Germany	1	0.013
653	Centre For International Research And Collaboration Ismo	1	0.013
654	Centre For Theory In Natural Sciences Aarhus University	1	0.013
655	Centre National De Recherch Archeologique Luxembourg	1	0.013
656	Centre National Pour La Recherche Scientifique Et Technique Rabat Morocco	1	0.013
657	Centre Of Excellence For Veterinary Research	1	0.013
658	Centre Of Excellence For Veterinary Research On Iranian Indigenous Domestic Animals	1	0.013
659	Centrum Of International Migration	1	0.013
660	Ceres Research School Of Wageningen University The Netherlands	1	0.013
661	Cfee	1	0.013
662	Cgiar Research Program On Livestock Crp Health	1	0.013
663	Chamran University Of Ahvaz	1	0.013
664	Chengdu Giant Panda Breeding Research Foundation	1	0.013
665	Chicago Zoological Society	1	0.013
666	Chilean Water Directorate Dga Through National Water Balance Updating Project	1	0.013
667	China National Natural Science Foundation Regional Science Fund Project	1	0.013
668	China National Program Of Infectious Disease	1	0.013
669	China Postdoctocral Science Foundation	1	0.013
670	China Scholarship Council	1	0.013
671	China Tobacco Yunnan Industrial Co Ltd	1	0.013
672	Chinese Domestic Animal Germplasm Resources Infrastructure	1	0.013
673	Chinese Government	1	0.013
674	Chinese High Tech R D Programme 863	1	0.013
675	Chinese Ministry For Science And Technology	1	0.013
676	Chr Hansen Italia Spa	1	0.013
677	Cib Consorzio Interuniversitario Biotecnologie Of Italy	1	0.013
678	Climxtreme The Research Network On Climate Change And Extreme Events	1	0.013
679	Clinical Studies Department Of The Veterinary School	1	0.013
680	Cmn	1	0.013
681	Coimbra Group Universities	1	0.013
682	Coin Centre Of Excellence Academy Of Finland	1	0.013
683	Collaborative Innovation Center For Diagnosis And Treatment Of Infectious Diseases	1	0.013
684	Collection Development And Utilization Of Camel Natural Biological Resources In China And Mongolia	1	0.013
685	College Of Agriculture And Life Sciences Cals For A Distinguished Undergraduate Research Dur Award	1	0.013
686	College Of Agriculture And Natural Resources University Of Tehran	1	0.013
687	College Of Graduate Studies Cgs Kuwait University	1	0.013
688	College Of Life Sciences And Medicine University Of Aberdeen	1	0.013
689	College Of Medicine Al Muthanna University Iraq	1	0.013
690	College Of Medicine And Health Sciences	1	0.013
691	College Of Medicine And Health Sciences Cmhs United Arab Emirates University Uaeu	1	0.013
692	College Of Medicine And Health Sciences Uae University	1	0.013
693	College Of Medicine And Pharmacy Research Centres	1	0.013
694	College Of Medicine Mohammed Bin Rashid University Of Medicine And Health Sciences Dubai United Arab Emirates	1	0.013
695	College Of Medicine Research Centre Cmrc	1	0.013
696	College Of Medicine Research Centre Deanship Of Scientific Research King Saud University Riyadh Saudi Arabia	1	0.013
697	College Of Medicine Research Centre King Saud University In Riyadh Saudi Arabia	1	0.013
698	College Of Medicine Research Centre King Saud University Riyadh Saudi Arabia	1	0.013
699	College Of Science King Abdulaziz University Jeddah	1	0.013
700	College Of Veterinary And Animal Science Bikaner And Dean	1	0.013
701	College Of Veterinary Medicine And Animal Resources	1	0.013
702	College Of Veterinary Medicine Mosul University Iraq	1	0.013
703	College Of Veterinary Medicine University Of Fallujah Iraq	1	0.013
704	College Research Centre King Saud University Riyadh	1	0.013
705	Colorado State University	1	0.013
706	Comision Nacional De Investigacion Cientifica Y Tecnologica Conicyt	1	0.013
707	Commonwealth Scientific Industrial Research Organisation Csiro	1	0.013
708	Communicable Disease Control Department	1	0.013
709	Communicable Disease Control Department Routine Budget	1	0.013
710	Comunidad De Madrid	1	0.013
711	Conacyt Ciencia Basica 2015 Project	1	0.013
712	Conicyt Fondecyt	1	0.013
713	Conseil Departemental De L Ain	1	0.013
714	Conservation And Genetic Improvement Centre Cgic	1	0.013
715	Consorzio Interuniversitario Biotecnologie Cib Trieste Italy	1	0.013
716	Consorzio Interuniversitario Biotecnologie Of Italy	1	0.013
717	Construction Of Double First Class Discipline Innovation Team Project	1	0.013
718	Consultancy Service For Enhancing Laboratory Surveillance Of Emerging Infectious Disease For The Hong Kong Special Administrative Region Department Of Health	1	0.013
719	Consultative Group For International Agricultural Research Cgiar Program On Agriculture For Nutrition And Health	1	0.013
720	Consultative Group For International Agricultural Research Program On Agriculture For Nutrition And Health	1	0.013
721	Cooperation Of Cholistan Development Authority Cda	1	0.013
722	Coordination Unit Kenya Arid And Semi Arid Lands Research Project	1	0.013
723	Cost Office	1	0.013
724	Crdf Global	1	0.013
725	Creative Research Groups Of Gansu Province	1	0.013
726	Croucher Senior Medical Research Fellowship Croucher Foundation Hong Kong	1	0.013
727	Csl	1	0.013
728	Csun Office Of Graduate Studies	1	0.013
729	Csun Office Of Research And Sponsored Projects	1	0.013
730	Cv Raman International Fellowship Programme	1	0.013
731	Cvas	1	0.013
732	Cvas Bikaner	1	0.013
733	Czech National Sustainability Programme	1	0.013
734	Dairy Industries Company Pegah	1	0.013
735	Dairy Management Inc Rosemont Il Us	1	0.013
736	Dalquest Desert Research Station Owned By Midwestern State University Texas	1	0.013
737	Danish Agency For Science Technology And Innovation	1	0.013
738	Danish Center For Scientific Computing	1	0.013
739	Danish Council For Independent Research I Natural Sciences	1	0.013
740	Danish Government Scholarship Under The Cultural Agreements	1	0.013
741	Danish International Development Agency	1	0.013
742	Danish International Development Agency Danida	1	0.013
743	Danish International Development Agency Danida Haramaya Camel Dairy Project Through The Grant	1	0.013
744	Danish Ministry Of Family And Consumer Affairs	1	0.013
745	Davee Foundation	1	0.013
746	Dbt Project	1	0.013
747	Deans Of Research King Faisal University	1	0.013
748	Deanship For Scientific Research Taif University Ksa	1	0.013
749	Deanship Of Research At The Jordan University Of Science And Technology	1	0.013
750	Deanship Of Research Jordan University Of Science And Technology	1	0.013
751	Deanship Of Research King Saud University Riyadh	1	0.013
752	Deanship Of Scientific Research At Al Baha University	1	0.013
753	Deanship Of Scientific Research At Kfu	1	0.013
754	Deanship Of Scientific Research At King Abdulaziz University Jeddah	1	0.013
755	Deanship Of Scientific Research At King Khalid University Abha Saudi Arabia	1	0.013
756	Deanship Of Scientific Research At King Saud University Saudi Arabia	1	0.013
757	Deanship Of Scientific Research At King Saud University Through The Research Group	1	0.013
758	Deanship Of Scientific Research At King Saud University Through The Research Group Project	1	0.013
759	Deanship Of Scientific Research At The King Faisal University Ksa	1	0.013
760	Deanship Of Scientific Research College Of Food And Agricultural Sciences Research Centre King Saud University	1	0.013
761	Deanship Of Scientific Research College Of Veterinary Medicine And Animal Resources King Faisal University	1	0.013
762	Deanship Of Scientific Research Dsr King Abdulaziz University	1	0.013
763	Deanship Of Scientific Research Grant From King Saud University Saudi Arabia	1	0.013
764	Deanship Of Scientific Research King Faisal University Al Ahsa Saudi Arabia	1	0.013
765	Deanship Of Scientific Research King Faisal University Al Ahsaa Saudi Arabia	1	0.013
766	Deanship Of Scientific Research King Faisal University K S A	1	0.013
767	Deanship Of Scientific Research King Saud University Riyadh	1	0.013
768	Deanship Of Scientific Research King Saud University Through Vice Deanship Of Scientific Research Chairs	1	0.013
769	Deanship Of Scientific Research Of King Abdulaziz University	1	0.013
770	Deanship Of Scientific Research Of King Khalid University	1	0.013
771	Deanship Of Scientific Research Of The University	1	0.013
772	Deanship Of Scientific Research Qassim University Kingdom Of Saudi Arabia	1	0.013
773	Deanship Of Scientific Research Saudi Arabia	1	0.013
774	Deanship Of Scientific Research Taif University Saudi Arabia	1	0.013
775	Deanship Of Scientific Research University Of Tabuk Saudi Arabia	1	0.013
776	Deanship Of Scientific Research Vice Presidency For Graduate Studies And Scientific Research King Faisal University Al Ahsa Saudi Arabia	1	0.013
777	Deanship Of Scientific Research Yarmouk University Jordan	1	0.013
778	Deanship Of Scientific Researches King Faisal University	1	0.013
779	Deanship Of The Scientific Research For The King Faisal University	1	0.013
780	Deanship Of The Scientific Research In Northern Border University	1	0.013
781	Deanship Of The Scientific Research In Northern Border University Arar City Saudi Arabia	1	0.013
782	Death Valley Np California	1	0.013
783	Defence Science And Technology Organization Dsto Australia	1	0.013
784	Defence Science Technology Laboratory Under The Zoonoses And Emerging Livestock Systems Zels Programme	1	0.013
785	Defense Science And Technology Laboratory Under The Zoonoses And Emerging Livestock Systems Zels Programme	1	0.013
786	Denver Zoological Foundation	1	0.013
787	Department And Clinic Of Internal Diseases Faculty Of Veterinary Medicine University Of Warmia And Mazury In Olsztyn Poland	1	0.013
788	Department For Environment And Heritage South Australia	1	0.013
789	Department Of Agriculture Food And The Marine Ireland Under Its Firm Programme	1	0.013
790	Department Of Biology	1	0.013
791	Department Of Biotechnology	1	0.013
792	Department Of Biotechnology Distinguished Biotechnology Research	1	0.013
793	Department Of Defense Armed Forces Health Surveillance Center	1	0.013
794	Department Of Employment And Innovation Of The Regional Government Of Extremadura Spain	1	0.013
795	Department Of Environment And Conservation Western Australia	1	0.013
796	Department Of Finance Of Jiangsu Province	1	0.013
797	Department Of Food Processing Faculty Of Engineering And Technology Wolkite University Wolkite Ethiopia	1	0.013
798	Department Of Food Science And Nutrition College Of Food And Agricultural Sciences	1	0.013
799	Department Of Food Science And Technology Of Ferdowsi University Of Mashhad	1	0.013
800	Department Of Food Science Engineering And Technology At University Of Tehran	1	0.013
801	Department Of Husbandry And Development Of Animal Wealth	1	0.013
802	Department Of Ophthalmology Faculty Of Medicine Benha University	1	0.013
803	Department Of Pediatrics School Of Medicine Isfahan University Of Medical Sciences	1	0.013
804	Department Of Physiology Faculty Of Veterinary Medicine Zagazig University Zagazig Egypt	1	0.013
805	Department Of President S Affairs	1	0.013
806	Department Of Science And Technology And Department Of Biotechnology	1	0.013
807	Department Of Science And Technology Innovation In Science Pursuit For Inspired Research Inspire	1	0.013
808	Department Of Science And Technology Of Jiangsu Province	1	0.013
809	Department Of Science And Technology Of Yunnan Province	1	0.013
810	Department Of Science Technology Of Guangdong Province China	1	0.013
811	Department Of Veterinary Services Within The Kenya Ministry Of Agriculture Livestock And Fisheries	1	0.013
812	Department Of Water Land And Biodiversity Conservation South Australia	1	0.013
813	Dept Of Food Process Engineering Wolkite Univ Ethiopia	1	0.013
814	Dept Of Food Science Technology At The Jomo Kenyatta Univ Of Agriculture Technology In Kenya	1	0.013
815	Desert Channels Queensland Inc	1	0.013
816	Desert Research Center	1	0.013
817	Desert Research Centre	1	0.013
818	Desert Research Centre Cairo	1	0.013
819	Deutsche Gesellschaft Fur Internationale Zusammenarbeit	1	0.013
820	Deutscher Akademischer Austausch Dienst Daad German Academic Exchange Service Through The Joint Master In Transboundary Animal Disease Management Course Mtadm	1	0.013
821	Development Committee Of Basic Sciences At King Abdulaziz University	1	0.013
822	Dfid	1	0.013
823	Dgrst Grant Direction Generale De La Recherche Scientifique Et Technique Tunisie Appui A La Recherche Universitaire De Base	1	0.013
824	Diabetic Endocrine Metabolic Pediatric Unit Aboel Reesh Children Hospital Cairo University	1	0.013
825	Directorate General Of Veterinary Services Royal Court Affairs Muscat Sultanate Of Oman	1	0.013
826	Direktorat Riset Dan Pengabdian Masyarakat Deputi Bidang Penguatan Riset Dan Pengembangan Kementerian Riset Dan Teknologi Badan Riset Dan Inovasi Nasional Indonesia	1	0.013
827	Distinguished Scientist Fellowship Program Of King Saud University	1	0.013
828	Division Of Intramural Research Of The Niaid	1	0.013
829	Dlrm	1	0.013
830	Dmns Curator Grant Support	1	0.013
831	Dmns Teen Science Scholars Program	1	0.013
832	Doctoral Research Fund Of North China University Of Water Resources And Electric Power China	1	0.013
833	Doctoral School Of Gabes Sis	1	0.013
834	Doctoral School Of The National Institute Of Applied Sciences And Technology Insat Tunis University Of Carthage	1	0.013
835	Doctoral School Of The National Institute Of Applied Sciences And Technology Insat University Of Carthage Tunis Tunisia	1	0.013
836	Domestic Science And Technology Cooperation Project	1	0.013
837	Double Class Discipline Innovation Team Building Inner Mongolia China	1	0.013
838	Double First Class Think Tank Program Of China University Of Mining And Technology	1	0.013
839	Drygrow Foundation	1	0.013
840	Drylands Coordination Group Dcg Norway	1	0.013
841	Drylands Coordination Groups Dcg Of Norway	1	0.013
842	Duke University	1	0.013
843	Dutch Scientific Research	1	0.013
844	Dvs Moldf Dar Es Salaam Tanzania	1	0.013
845	Earmarked Fund For The National Key R D Program Of The 13th Five Year Plan Of China	1	0.013
846	East African Targeted Investment For Research Impact Eatiri Sub Project Under The Livestock Climate Change Collaborative Research System Llcc Crsp Colorado State University Usa	1	0.013
847	Ecn Usa	1	0.013
848	Ecole Nationale Veterinaire De Toulouse	1	0.013
849	Econet Programme	1	0.013
850	Ecotone Wildlife Veterinary Services	1	0.013
851	Education Audiovisual And Culture Executive Agency Of The Europian Commission	1	0.013
852	Education Ministry Of P R China	1	0.013
853	Eduscan Group Of Companies	1	0.013
854	Egerton University Kenya Muslims Charitable Society	1	0.013
855	Egyptian Academy Of Scientific Research And Technology At The City Of Scientific Research And Technological Applications Srta City	1	0.013
856	Egyptian Government Ministry Of Higher Education Cultural Affairs And Missions Sector	1	0.013
857	Eiar Ethiopian Institute Of Agricultural Research	1	0.013
858	Elite Researcher Grant Committee	1	0.013
859	Elite Youth Program In Chinese Academy Of Agricultural Sciences	1	0.013
860	Emirate Of Dubai	1	0.013
861	Emirates Foundation	1	0.013
862	Emirates Industries For Camel Milk And Products Dubai United Arab Emirates	1	0.013
863	Emirates Industries For Camel Milk Products Eicmp Dubai United Arab Emirates	1	0.013
864	Emirates Industry For Camel Milk Products Dubai Uae	1	0.013
865	Emory University	1	0.013
866	Enable And Enhance Initiative Of The Federal Government Of Germany	1	0.013
867	Enable And Enhance Initiative Of The Federal Government Of Germany Ertuchtigungsinitiative Der Deutschen Bundesregierung	1	0.013
868	Endeavour International Postgraduate Scholarship Australian Government	1	0.013
869	Endocrinology Metabolism Research Center Of Tehran University Of Medical Sciences	1	0.013
870	Engineer Mahamood Bin Badr Al Abri Director General Directorate General Of Veterinary Services	1	0.013
871	Enrichment Program For Minority Serving Institution Faculty Through The Department Of Homeland Security S Coastal Hazard Center Of Excellence	1	0.013
872	Environment Research Council Uk	1	0.013
873	Environmental Ventures Project In The Woods Institute For The Environment At Stanford University	1	0.013
874	Epa S Global Change Research Program	1	0.013
875	Epidemiologie De Maladies Bacteriennes A Transmission Vectorielle Des Herbivores Ministry Of Agriculture Of Tunisia	1	0.013
876	Epizone	1	0.013
877	Erasmus	1	0.013
878	Erasmus Programme	1	0.013
879	Eritrean Research Fund Erf	1	0.013
880	Escalante Staircase Nm Utah	1	0.013
881	Eth Zurich	1	0.013
882	Ethiopian Institute Of Agricultural Research	1	0.013
883	Ethiopian Institute Of Agricultural Research Eiar	1	0.013
884	Ethiopian Institute Of Agricultural Research Eiar Ethiopia	1	0.013
885	Eu Asia Link Project Uphumrauf	1	0.013
886	Eu Joint Program Initiative Hdhl Spanish Ministry Of Economy And Competitiveness Mineco	1	0.013
887	Eurasia Pacific Uninet	1	0.013
888	European And Developing Countries Clinical Trials Partnership Under Eu Horizon 2020	1	0.013
889	European Commission Fp7 Antigone	1	0.013
890	European Commission Fp7 Emperie	1	0.013
891	European Commission Marie Curie Programme	1	0.013
892	European Commission Project Prepare	1	0.013
893	European Commission S H2020 Program	1	0.013
894	European Cooperation In Science And Technology Cost	1	0.013
895	European Doctoral College Of Strasbourg	1	0.013
896	European Doctoral College Program Rosa Parks Class	1	0.013
897	European Neuromed Program	1	0.013
898	European Patent Office	1	0.013
899	European Public Health Training Program Euphem Ecdc Stockholm Sweden	1	0.013
900	European Regional Development Funds Feder Aei Feder Ue	1	0.013
901	European Research Council Erc	1	0.013
902	European Union And The European Social Fund	1	0.013
903	European Union Enpi Cbcmed Procamed Project	1	0.013
904	European Union Enpi Joint Operational Program Of The Mediterranean Basin Ievp Ct	1	0.013
905	European Union S Seventh Framework Program	1	0.013
906	European Union Through Enpi Cbc Med Procamed Project	1	0.013
907	European Union Through Procamed	1	0.013
908	European Union Through The Enpi Cbc Med Project Promotion Des Systems Camelins Innovants Et Des Filieres Locales Pour Une Gestion Durable Des Territoiressahariens Procamed	1	0.013
909	European Union Through The Procamed	1	0.013
910	European Union Through The Procamed Project Promotion Des Systemes Camelins Innovants Et Des Filieres Locales Pour Une Gestion Durable Des Territoires Sahariennes	1	0.013
911	European Union Within The Programme Ievp Ctmed	1	0.013
912	European Virus Archive Goes Global Project	1	0.013
913	Excellent Youth Foundation Of Heilongjiang Province Of China	1	0.013
914	Explorer S Club	1	0.013
915	Faculty Of Agriculture And Veterinary Medicine Department Of Food Science And Human Nutrition	1	0.013
916	Faculty Of Health Engineering And Science Edith Cowan University	1	0.013
917	Faculty Of Medicine And Health Sciences	1	0.013
918	Faculty Of Medicine And Health Sciences Fmhs	1	0.013
919	Faculty Of Nutrition Sciences And Food Industry	1	0.013
920	Faculty Of Veterinary Medicine And Animal Health Slu	1	0.013
921	Faculty Of Veterinary Medicine Sudan University Of Science And Technology	1	0.013
922	Fajre Shahdaneh Ye Tabarestan Sari Iran	1	0.013
923	Fao Date Project	1	0.013
924	Fao Project	1	0.013
925	Fao Project Of Improvement Of Research For Sustainable Development Of Camel Production In The Ksa	1	0.013
926	Fda Center For Biologics Evaluation And Research Intramural Sars Cov 2 Fund	1	0.013
927	Feder Avansecal	1	0.013
928	Feder Consolider Ingenio Program Of The Spanish Ministry Of Economy And Competitiveness	1	0.013
929	Feder Fi Cyt Feder Ue	1	0.013
930	Feder Ficyt Feder Ue	1	0.013
931	Feder Funds Mciu Aei Feder Eu	1	0.013
932	Federal Government Of Nigeria Education Trust Fund Adekunle Ajasin University Akungba Akoko Ondo State Of Nigeria	1	0.013
933	Feinstein International Centre Of Tufts University	1	0.013
934	Field Epidemiology And Laboratory Training Program Kenya	1	0.013
935	First Class Discipline Construction Fund Project Of School Of Food Science And Engineering Belt And Road Joint Laboratory Of China Mongolia Biopolymer Application And In Depth Research And Industrial Demonstration Of Camel Milk Cosmetics	1	0.013
936	Flemish Inter University Council University Development Cooperation Vlir Uos	1	0.013
937	Fmhs Research Committee	1	0.013
938	Fogarty Global Infectious Diseases Training Grant	1	0.013
939	Folsom Children S Zoo	1	0.013
940	Foncyt	1	0.013
941	Fondo Europeo De Desarrollo Regional Feder Of Eu	1	0.013
942	Food And Agriculture Organizations Of The United Nations Fao	1	0.013
943	Food And Health Bureau	1	0.013
944	Foreign Aid Project Of The Ministry Of Education	1	0.013
945	Foreign And Commonwealth Office Bilateral Programme Budget Fund Award From The British Embassy In Amman	1	0.013
946	Foundation L Oreal Unesco For Women In Science	1	0.013
947	Foundation Of The First President Of The Republic Of Kazakhstan	1	0.013
948	Frank Raines Ohv Park California	1	0.013
949	Fred Hutchinson Cancer Research Center	1	0.013
950	French Agricultural Research For Development Cirad	1	0.013
951	French Association Gala	1	0.013
952	French Embassy At Almaty Kazakhstan	1	0.013
953	French Embassy At Cairo Egypt	1	0.013
954	French Embassy At Khartoum Sudan	1	0.013
955	French Embassy In Abu Dhabi	1	0.013
956	French Embassy In Almaty Kazakhstan	1	0.013
957	French Embassy Khartoum	1	0.013
958	French Government	1	0.013
959	French Ministry For Teaching And Research Doctoral School Universite Paris Sud	1	0.013
960	French Ministry Of Foreign Affairs Econet Programme	1	0.013
961	French Region Of Hauts De France	1	0.013
962	French State	1	0.013
963	Friedrich Loeffler Institut Germany	1	0.013
964	Friedrich Miescher Institute Basel Swizerland	1	0.013
965	Frip	1	0.013
966	Fujian Agricultural And Forestry University	1	0.013
967	Fujian Education Department	1	0.013
968	Fujian Science Technology Innovation Laboratory For Optoelectronic Information Of China	1	0.013
969	Fulbright Commission Of Ireland	1	0.013
970	Fulbright Scholarship Us Department Of State Washington Dc	1	0.013
971	Fund Of College Of Veterinary Medicine Gansu Agricultural University	1	0.013
972	Fundacao Amazonia De Amparo A Estudos E Pesquisas Fapespa	1	0.013
973	Fundacao De Amparo A Pesquisa Do Estado De Minas Gerais Fapemig	1	0.013
974	Fundacio Marato De Tv3	1	0.013
975	Fundacion Banco Santander	1	0.013
976	Fundacion Para La Investigacion Biosanitaria De Asturias Finba Asturias Spain	1	0.013
977	Fundamental Research Fund From Southeast University	1	0.013
978	Fundamental Research Funds Of State Key Lab	1	0.013
979	Fundation Of Shaanxi University Of Technology	1	0.013
980	Funds For Fundamental Research Creative Groups Of Gansu Province China	1	0.013
981	Funds From Tam Wah Ching Research Endowment	1	0.013
982	Fyssen Foundation	1	0.013
983	Gadarif Regional Veterinary Laboratory Grvl	1	0.013
984	Gansu Agricultural University Library Team	1	0.013
985	Gansu Key Laboratory Of Animal Generational Physiology And Reproductive Regulation And Gansu Flying Scholar Special Appointment Professor Plan	1	0.013
986	Garrapata Sp California	1	0.013
987	Gayo Pastoral Development Initiative Gpdi	1	0.013
988	Gcc Patents Office	1	0.013
989	Gdri Cnrs Cnrst	1	0.013
990	Gdri Neuro Cnrs Cnrst Gdri France Morocco	1	0.013
991	Gdri Neuro Cnrs Cnrst Inserm France Maroc	1	0.013
992	General Administration Of Quality Supervision Inspection And Quarantine Of P R China	1	0.013
993	General Directorate Of Livestock Canary Government	1	0.013
994	General Directorate Of Scientific Research And Technological Development Dgrsdt Of Algeria	1	0.013
995	General Electric	1	0.013
996	General Research Fund University Grants Committee Hong Kong	1	0.013
997	Genofond Dynamics Program	1	0.013
998	Geo X The Research Network For Geosciences In Berlin And Potsdam	1	0.013
999	German Academic Exchange Service Daad Karlsruhe Institute Of Technology Kit	1	0.013
1000	German Federal Foreign Office	1	0.013
1001	German Federal Foreign Office Germany	1	0.013
1002	German Federal Ministry For Economic Cooperation And Development	1	0.013
1003	German Federal Ministry Of Education And Research Bmbf Through Reload Project	1	0.013
1004	German Office For Foreign Affairs German Partnership Program For Biosecurity	1	0.013
1005	Gida Tarim Ve Hayvancilik Bakanligi	1	0.013
1006	Glaxosmithkline	1	0.013
1007	Global Challenges Research Fund Gcrf One Health Regional Network For The Horn Of Africa Horn Project	1	0.013
1008	Global Coe Program Frontier Program For Animal Global Health And Hygiene Ministry Of Education Culture Sports Science And Technology Japan	1	0.013
1009	Global Collaborative Rd Program	1	0.013
1010	Global Environment Facility	1	0.013
1011	Global Water Futures Program	1	0.013
1012	Glycobiom	1	0.013
1013	Glycohit	1	0.013
1014	Gobierno De Canarias Spain	1	0.013
1015	Golestan University Of Medical Sciences	1	0.013
1016	Gomole District Pastoral Office	1	0.013
1017	Gordon And Betty Moore Foundation	1	0.013
1018	Gordon Memorial Trust Uk	1	0.013
1019	Government Agency In Queensland	1	0.013
1020	Government Agency In The Northern Territory	1	0.013
1021	Government Agency In The South Australia	1	0.013
1022	Government Agency In Western Australia	1	0.013
1023	Government Of Dubai	1	0.013
1024	Government Of Dubai Dubai United Arab Emirates	1	0.013
1025	Government Of Hungary	1	0.013
1026	Government Of The Hong Kong Special Administrative Region	1	0.013
1027	Government Of The Russian Federation	1	0.013
1028	Graham Centre For Agricultural Innovation	1	0.013
1029	Grants Iga	1	0.013
1030	Great Gobi Strictly Protected Area Region A Administration	1	0.013
1031	Greening Australia	1	0.013
1032	Gtz	1	0.013
1033	Guangdong Basic And Applied Basic Research Foundation	1	0.013
1034	Guangdong Provincial Key Laboratory Of Fermentation And Enzyme Engineering	1	0.013
1035	Guangdong Provincial Key Laboratory Of Food Quality And Safety	1	0.013
1036	Guangdong Science And Technology Foundation	1	0.013
1037	Guizhou Academician Expert Workstation Of Microbe And Health	1	0.013
1038	Guizhou Provincial Key Technologies Rd	1	0.013
1039	Gush Katif Regional Research And Development Center	1	0.013
1040	H H General Sheikh Nlohamrned Bin Rashid Al Maktoum Ruler Of Dubai	1	0.013
1041	H H Shaikh Mohammed Bin Rashid Al Maktoum	1	0.013
1042	H H Sheikh Hamadan Bin Mohammed Bin Rashid Al Makhtoum Crown Prince Of Dubai Uae	1	0.013
1043	H H Sheikh Hamadan Bin Mohammed Bin Rashid Al Maktoum Crown Prince Of Dubai Uae	1	0.013
1044	Hamad Bin Khalifa University Qatar Foundation	1	0.013
1045	Hamad Medical Corporation	1	0.013
1046	Haramaya University Research Office	1	0.013
1047	Hassan Ii Agronomy And Veterinary Medicine Institute	1	0.013
1048	Hassan Ii Institute Of Agronomy And Veterinary Medicine By Prfi	1	0.013
1049	Hauts De France Council	1	0.013
1050	Hbcu Up Research Initiation Award From The National Science Foundation	1	0.013
1051	Head Of Department Of Veterinary Microbiology And Biotechnology And Dean	1	0.013
1052	Health And Life Sciences Doctoral School Of Strasbourg University France	1	0.013
1053	Health And Medical Research Fund	1	0.013
1054	Health And Medical Research Fund Commissioned Research On Control Of Infectious Diseases	1	0.013
1055	Health And Medical Research Fund Food And Health Bureau Government Of The Hong Kong Special Administrative Region Hong Kong	1	0.013
1056	Health And Medical Research Fund From The Research Fund Secretariat Food And Health Bureau Hong Kong Special Administrative Region	1	0.013
1057	Health Promotion Department	1	0.013
1058	Health Protection Research Unit From The National Institute Of Health Research	1	0.013
1059	Heber Dunes State Vehicular Recreational Area California	1	0.013
1060	Hebrew University Veterinary Teaching Hospital	1	0.013
1061	Hec Indigenous 5000 Ph D Fellowship Program Batch Iii	1	0.013
1062	Helsinki University Hospital Funds	1	0.013
1063	Henan Collaborative Innovation Of Textile And Clothing Industry	1	0.013
1064	Hengrui	1	0.013
1065	Hh General Sheikh Mohammed Bin Rashid Al Maktoum	1	0.013
1066	Hh Sheikh Hamdan Bin Rashid Al Maktoum Award For Medical Sciences Grant	1	0.013
1067	High Level Talents Introduction	1	0.013
1068	High National Veterinary School Of Algiers Algeria	1	0.013
1069	Higher Committee For Education Development In Iraq Hced	1	0.013
1070	Higher Education Commission Hec Of Pakistan Under 5000 Indigenous Ph D Fellowship Program Batch Vii	1	0.013
1071	Higher Education Commission Islamabad	1	0.013
1072	Higher Education Commission Islamabad Pakistan Hec	1	0.013
1073	Higher Education Commission Pakistan Through The International Research Support Initiative Program Irsip	1	0.013
1074	Higher Education Institution Of Moe	1	0.013
1075	Higher Education Scientific Research Project Of Ningxia	1	0.013
1076	Higher Education Teaching Reform Research And Practice Project Of Henan Province	1	0.013
1077	Higher Ministry Of Education In The Arab Republic Of Egypt	1	0.013
1078	Highglycan	1	0.013
1079	Highlevel Talents Introduce Scientific Research Start Up Project	1	0.013
1080	His Excellency Nasr Bin Humood Al Kindi Minister Of Royal Court Affairs	1	0.013
1081	His Highness General Shaikh Mohammad Bin Rashid Al Maktoum Vice President And Prime Minister Of The United Arab Emirates And Ruler Of Dubai	1	0.013
1082	His Highness Shaikh Mohammad Bin Rashid Al Maktoum Vice President Of The United Arab Emirates And Ruler Of Dubai	1	0.013
1083	His Highness The President Sheikh Khalifa Bin Zayed Al Nahyan	1	0.013
1084	Hk Rgc Project	1	0.013
1085	Hong Kong Grf Project	1	0.013
1086	Hong Kong Research Grants Council	1	0.013
1087	Hong Kong Special Administrative Region Health And Medical Research Fund	1	0.013
1088	Hubert Curien Partnership Toubkal Phc Toubkal	1	0.013
1089	Hungarian Academy Of Sciences	1	0.013
1090	I R Iran	1	0.013
1091	Ica In Israel	1	0.013
1092	Icar National Centre For Veterinary Type Culture Collection National Research Centre On Equines Hisar Haryana India	1	0.013
1093	Icar Under Livestock Production Management Project	1	0.013
1094	Icrea	1	0.013
1095	Ifpri	1	0.013
1096	Imperial Sand Dunes Ohv California	1	0.013
1097	Inca Ligue Contre Le Cancer Ecmpact	1	0.013
1098	Indian Council Of Agricultural Research New Delhi India Through Aicrp On Increased Utilization Of Animal Energy With Enhanced System Efficiency Udaipur Centre Rajasthan India	1	0.013
1099	Indian Council Of Agricultural Research New Delhi Through Aicrp On Increased Utilisation Of Animal Energy	1	0.013
1100	Indian Council Of Agricultural Research New Delhi Through Aicrp On Increased Utilisation Of Animal Energy With Enhanced System Efficiency Udaipur Centre Rajasthan India	1	0.013
1101	Indian Council Of Agricultural Research New Delhi Through Aicrp On Increased Utilization Of Animal Energy With Enhanced System Efficiency Udaipur Center Rajasthan India	1	0.013
1102	Indian Council Of Agricultural Research New Delhi Through Aicrp On Increased Utilization Of Animal Energy With Enhanced System Efficiency Udaipur Centre Rajasthan India	1	0.013
1103	Indian Council Of Agricultural Research New Delhi Under Aicrp On Improvement Of Feed Resources And Nutrients Utilization In Raising Animal Production	1	0.013
1104	Indian Council Of Agricultural Research Through Network Project On Animal Genetic Resources	1	0.013
1105	Individual Uae University Grant	1	0.013
1106	Individual University Grant	1	0.013
1107	Industrial Strategic Technology Development Program	1	0.013
1108	Infectious Disease Translational Research Training Program At Colorado State University	1	0.013
1109	Infs	1	0.013
1110	Inner Mongolia Agricultural University High Level Talent Introduction Scientific Research Start Up Project Hohhot China	1	0.013
1111	Inner Mongolia Autonomous Region Natural Science Foundation	1	0.013
1112	Inner Mongolia Autonomous Region Science And Technology Plan Project	1	0.013
1113	Inner Mongolia College Science Research Project	1	0.013
1114	Inner Mongolia Innovation Guidance Fund Funding Project	1	0.013
1115	Inner Mongolia Natural Science Foundation China	1	0.013
1116	Inner Mongolia Normal University Computer And Information Engineering College Science And Technology Innovation Team	1	0.013
1117	Inner Mongolia Science Technology Plan	1	0.013
1118	Inner Mongolia Talent Development Fund	1	0.013
1119	Innovation And Exploration Project Of State Key Laboratory Of Food Science And Technology	1	0.013
1120	Innovation Fund Denmark	1	0.013
1121	Innovation Fund For Technology Based Firms Of China	1	0.013
1122	Innovative Economy Operational Programme	1	0.013
1123	Innovative Medicines Initiative Imi	1	0.013
1124	Inonu University Scientific And Research Unit	1	0.013
1125	Inra Phase Department	1	0.013
1126	Institut Agronomique Et Veterinaire Hassan Ii	1	0.013
1127	Institut Des Regions Arides	1	0.013
1128	Institut National De La Sante Et De La Recherche Medicale Inserm	1	0.013
1129	Institut Pasteur Tunis Prfd4p1 Project Tunisia	1	0.013
1130	Institute For Critical Technology And Applied Science At Virginia Tech	1	0.013
1131	Institute For The Promotion Of Innovation By Science And Technology In Flanders Iwt	1	0.013
1132	Institute Fund Of Indian Council Of Agricultural Research Project Directorate On Fmd	1	0.013
1133	Institute Of Bacterial Infections And Zoonoses Friedrich Loffer Institut Jena Germany	1	0.013
1134	Institute Of Biology Of The Mongolian Academy Of Sciences	1	0.013
1135	Institute Of British Geographers Thesiger Oman Fellowship	1	0.013
1136	Institute Of International Education Tie Usa	1	0.013
1137	Institute Of Process Engineering In Life Sciences Food Process Engineering Karlsruhe Germany	1	0.013
1138	Institute Of Scientific Research And Revival Of Islamic Heritage At Umm Al Qura University Makkah Ksa	1	0.013
1139	Institute Of Standards And Industrial Research Of Iran The University Of Tehran	1	0.013
1140	Institute On Medicine As A Profession Imap	1	0.013
1141	Institute Research Council Of Icar National Dairy Research Institute Karnal	1	0.013
1142	Institutions Of Higher Learning Scientific Research Projects Of Inner Mongolia	1	0.013
1143	Integrated Actions Of The Agencia Espa Ola De Cooperacion Internacional Al Desarrollo Aecid Of Spain	1	0.013
1144	Integrated Biological Control Applied Research Program Ibcarp Camel Grant	1	0.013
1145	Integrated Control Of Neglected Zoonoses Iconz	1	0.013
1146	Integrated Modeling Program For Canada Impc	1	0.013
1147	Integration Program Of The Siberian Branch Of The Russian Academy Of Science	1	0.013
1148	Interdisciplinary Grant	1	0.013
1149	Internal Grant Agency Of Mendel University In Brno	1	0.013
1150	Internal Grant Agency Of The Faculty Of Agronomy Mendel University In Brno Iga Fa Mendelu	1	0.013
1151	Internal Grant Agency Of The Faculty Of Tropical Agrisciences Culs Prague	1	0.013
1152	Internal Grant Agency Of The Faculty Of Tropical Agrisciences Czech University Of Life Sciences Culs Prague	1	0.013
1153	Internal Grant Agency Of The Fta Culs Prague	1	0.013
1154	International And Domestic Science And Technology Cooperation Project	1	0.013
1155	International Arid Lands Consortium And The United States Environmental Protection Agency S Office Of Research And Development	1	0.013
1156	International Center For Diffraction Data Icdd	1	0.013
1157	International Cooperation Project Spanish Agency For International Cooperation And Development	1	0.013
1158	International Dairy Federation	1	0.013
1159	International Foundation For Science Ifs Stockholm Sweden Through An Ifs Grant	1	0.013
1160	International Fund For Agricultural Development Ifad	1	0.013
1161	International Institute For Environment And Development Iied	1	0.013
1162	International Livestock Management Training Center Ilmtc	1	0.013
1163	International Partnership Programme Of The Bureau Of International Cooperation Chinese Academy Of Sciences	1	0.013
1164	International Project Of Scientific Cooperation Pics	1	0.013
1165	International Research Project As Part Of The German Biosecurity Program Federal Foreign Office Germany	1	0.013
1166	International Research Project Brucellosis In Pakistan As Part Of The German Partnership Program For Excellence And Healthy Security Federal Foreign Office Germany	1	0.013
1167	International Science And Technology Cooperation Program Project Of Xpcc	1	0.013
1168	International Training Program For Outstanding Young Scientists In Universities Of Guangdong Province	1	0.013
1169	Intramural Research Program Of Nih Center For Cancer Research Ccr Nci	1	0.013
1170	Intramural Research Program Of The National Center For Advancing Translational Sciences Nih	1	0.013
1171	Intramural Research Program Of The Nih National Center For Advancing Translational Sciences Ncats	1	0.013
1172	Iran Dairy Industries Company Pegah	1	0.013
1173	Iran Society Of Biophysical Chemistry	1	0.013
1174	Iranian Center Of Excellence For Application Of Modern Technologies For Producing Functional Foods And Drinks	1	0.013
1175	Iranian Ministry Of Science	1	0.013
1176	Iranian Research Organization For Science And Technology	1	0.013
1177	Iranian Research Organization For Science And Technology Irost	1	0.013
1178	Iranian Research Organization For Science And Technology Irost University Of Tehran Iran	1	0.013
1179	Iresa	1	0.013
1180	Iresa Ministry Of Agriculture Water Resources And Fisheries Tunisia Through The Mecamel Project Promotion De La Mecanisation De La Traite Chez Les Petits Eleveurs Des Chamelles Laitieres	1	0.013
1181	Iresa Ministry Of Agriculture Water Resources And Fisheries Tunisia Through The Project Mecamel Promotion De La Mecanisation De La Traite Chez Les Petits Eleveurs Des Chamelles Laitieres	1	0.013
1182	Irost	1	0.013
1183	Isaac Dreyfus Bernheim Stiftung	1	0.013
1184	Isaac Newton Trust	1	0.013
1185	Isfahan University Of Medical Sciences	1	0.013
1186	Islamic Azad University Shahrekord Branch Iran Grant	1	0.013
1187	Islamic Development Bank Idb Jeddah Saudi Arabia	1	0.013
1188	Italian And Tunisian Cooperation	1	0.013
1189	Italian Ministry Of Agriculture Forestry And Food Policies Rome	1	0.013
1190	Italian Tunisian Cooperation Funds	1	0.013
1191	Itmo University	1	0.013
1192	Jane And Aatos Erkko Foundation	1	0.013
1193	Janssen Biotech Inc	1	0.013
1194	Janssen Cilag Pharma	1	0.013
1195	Japan China Medical Association	1	0.013
1196	Japan China Sasagawa Medical Fellowship	1	0.013
1197	Japan Science Technology Agency Jst	1	0.013
1198	Jeff Bond Science Librarian At Texas Christian University	1	0.013
1199	Jerash University	1	0.013
1200	Jiangsu Hengrui Medicine Co Ltd	1	0.013
1201	Jiangsu Hengrui Medicine Lianyungang China	1	0.013
1202	Jiangsu Hengrui Pharmaceuticals	1	0.013
1203	Jiangsu Hengrui Pharmaceuticals Co Ltd	1	0.013
1204	Jiangsu Nanobody Engineering And Research Center Of China	1	0.013
1205	Jiangsu Planned Projects For Postdoctoral Research Funds	1	0.013
1206	Jigjiga University Directorate Of Research Publication And Technology Transfer	1	0.013
1207	Jimma University	1	0.013
1208	Jisc Design For Learning Programe	1	0.013
1209	John D And Catherine T Macarthur Foundation	1	0.013
1210	Johnson Johnson	1	0.013
1211	Johnson Johnson Usa	1	0.013
1212	Joint Program Of Beijing Natural Science Foundation	1	0.013
1213	Jordan University Of Science And Technology Irbid Jordan	1	0.013
1214	Jornada Experimental Range Las Cruces New Mexico	1	0.013
1215	Joshua Tree Np California	1	0.013
1216	Kacst	1	0.013
1217	Kacst From Center Of Excellence For Genomics Ceg King Abdulaziz City For Science And Technology Kacst	1	0.013
1218	Kadur Factory In Iran	1	0.013
1219	Kansas Bioscience Authority	1	0.013
1220	Kashan University Of Medical Sciences	1	0.013
1221	Kato Foundation For Promotion Of Science	1	0.013
1222	Kenneth King Foundation	1	0.013
1223	Kenya Agricultural Research Institute	1	0.013
1224	Kenya Agricultural Research Institute Kari	1	0.013
1225	Kenya Agricultural Research Institute Management	1	0.013
1226	Kenya Arid And Semi Arid Lands Kasal	1	0.013
1227	Kenya Arid And Semi Arid Lands Kenya Agricultural Research Institute Kasal Kari	1	0.013
1228	Kenya Camel Association	1	0.013
1229	Kenya S National Research Fund Nrf	1	0.013
1230	Kenya S National Research Fund Nrf Project Nuf Nrf Bbsrc Call	1	0.013
1231	Kerman University Of Medical Sciences	1	0.013
1232	Key Deployment Projects Of The Chinese Academy Of Sciences	1	0.013
1233	Key Laboratory Major Open Project Fund Of Inner Mongolia	1	0.013
1234	Key Laboratory Of Active Components Of Xinjiang Natural Medicine And Drug Release Technology	1	0.013
1235	Key Laboratory Of Dairy Biotechnology And Bioengineering Ministry Of Education College Of Food Science And Engineering Inner Mongolia Agricultural University And Camel Research Institute Of Inner Mongolia China	1	0.013
1236	Key Laboratory Of Tarim Animal Husbandry Science And Technology Xinjiang Production Construction Group Open Project Fund	1	0.013
1237	Key Laboratory Of Veterinary Pharmaceutical Development Of The Ministry Of Agriculture	1	0.013
1238	Key Project Of Inter Governmental International Scientific And Technological Innovation Cooperation	1	0.013
1239	Key Project Of Intergovernmental International Scientific And Technological Innovation Cooperation	1	0.013
1240	Key Project Of Natural Science Foundation Of Heilongjiang Province China	1	0.013
1241	Key Projects Of Chinese Academy Of Sciences	1	0.013
1242	Key Research And Development Projects In Xinjiang Autonomous Region China	1	0.013
1243	Key Research Program Of Frontier Sciences Cas	1	0.013
1244	Key Technologies R D Programme Of Xinjiang Production Construction Corps	1	0.013
1245	Key Technologies R D Programme Of Xinjiang Production Construction Group	1	0.013
1246	Key Technology R D Program Of Jiangsu Province Social Development	1	0.013
1247	Key Technology Research And Development Program In Autonomous Region	1	0.013
1248	Key Topics For State Key Laboratory Of Materials Oriented Chemical Engineering	1	0.013
1249	Khorasan Razavi Veterinary Administration Iran	1	0.013
1250	Kidney Transplantation Complications Research Center Department Of Internal Medicine Ghaem Hospital Mashhad University Of Medical Sciences Mashhad Iran	1	0.013
1251	Kimberley Zone Control Authority	1	0.013
1252	King Abdul Aziz City For Science And Technology	1	0.013
1253	King Abdul Aziz City For Science And Technology Kaacst Riyadh Saudi Arabia	1	0.013
1254	King Abdul Aziz City For Science And Technology Kacst Basic Research Programmes National Transformation Programme Under Research And Development Grants Program For National Research Institutions And Centres Gpurc Kingdom Of Saudi Arabia	1	0.013
1255	King Abdul Aziz City For Science And Technology Kacst Project Riyadh Saudi Arabia	1	0.013
1256	King Abdul Aziz City For Science And Technology Kacst Saudi Arabia Through The Mers Cov Research Grant Program	1	0.013
1257	King Abdul Aziz City For Science And Technology Kacst Saudi Arabia Through The Mers Cov Research Grant Program Targeted Research Program Trp	1	0.013
1258	King Abdul Aziz City For Science And Technology Kacst Saudi Arabia Through The Mers Cov Research Grant Programme Targeted Research Program Trp	1	0.013
1259	King Abdul Aziz City For Science And Technology Saudi Arabia Grant	1	0.013
1260	King Abdul Aziz City For Science And Technology Through The Mers Cov Research Grant Program Kacst Targeted Research Program	1	0.013
1261	King Abdulaziz City For Science And Technology And King Faisal Specialist Hospital And Research Centre	1	0.013
1262	King Abdulaziz City For Science And Technology Kacst Kingdom Of Saudi Arabia Riyadh General Directorate Of Research Grants Programs	1	0.013
1263	King Abdulaziz City For Science And Technology Kacst Through Mers Cov Is A Part Of The National Transformation Plan Ntp	1	0.013
1264	King Abdulaziz City For Science And Technology Kacst Through Saudi Arabia	1	0.013
1265	King Abdulaziz City For Science And Technology Kacst Through The Mers Cov Research Grant Program	1	0.013
1266	King Abdulaziz City For Science And Technology Riyadh	1	0.013
1267	King Abdulaziz City For Science And Technology Stem Cell Technology Localization Program	1	0.013
1268	King Abdulaziz City For Science And Technology Through The Mers Cov Research Grant Program Targeted Research Program	1	0.013
1269	King Abdulaziz City Of Science And Technology	1	0.013
1270	King Abdulaziz City Of Science And Technology Kacst Saudi Arabia	1	0.013
1271	King Abdulaziz City Of Sciences And Technology	1	0.013
1272	King Abdulaziz University Jeddah	1	0.013
1273	King Fahd Medical Research Center	1	0.013
1274	King Fahd Medical Research Center Kfmrc King Abdulaziz University Kau Jeddah Saudi Arabia	1	0.013
1275	King Faisal University Al Ahsa Saudi Arabia	1	0.013
1276	King Faisal University Kfu Under Nasher Track	1	0.013
1277	King Khalid Wildlife Research Center	1	0.013
1278	King Saud University Deanship Of Scientific Research At The College Of Food And Agriculture Sciences Research Center	1	0.013
1279	King Saud University Deanship Of Scientific Research At The College Of Food And Agriculture Sciences Research Centre	1	0.013
1280	King Saud University Deanship Of Scientific Research College Of Food And Agricultural Sciences Research Centre Saudi Arabia	1	0.013
1281	King Saud University Deanship Of Scientific Research Dsr Research Group	1	0.013
1282	King Saud University Kayyali Chair For Pharmaceutical Industry	1	0.013
1283	Kkwrc	1	0.013
1284	Kobe University Graduate School Of Medicine Japan	1	0.013
1285	Korea Africa Economic Cooperation Trust Fund Through The African Development Bank	1	0.013
1286	Kreitman Fellowship	1	0.013
1287	Kreitman School Of Advanced Graduate Studies At Ben Gurion University Of The Negev	1	0.013
1288	Kuwait Foundation For The Advancement Of Sciences Kfas	1	0.013
1289	Kuwait Foundation For The Advancement Of Sciences Kfas Kuwait City Kuwait	1	0.013
1290	Kuwait Mit Center For Natural Resources And The Environment Cnre Cambridge Ma	1	0.013
1291	Kuwait University Research Sector	1	0.013
1292	Kyoto University Supporting Program For Interaction Based Initiative Team Studies Spirits	1	0.013
1293	La Region Des Hauts De France Through Cper Feder Grant 2016 2020	1	0.013
1294	Labex Cemeb Mediterranean Centre For Environment And Biodiversity Montpellier France	1	0.013
1295	Laboratoire D Epidemiologie D Infections Enzootiques Des Herbivores En Tunisie Application A La Lutte Ministere De L Enseignement Superieur Et De La Recherche Scientifique Tunisie	1	0.013
1296	Laboratoire D Epidemiologie D Infections Enzootiques Des Herbivores En Tunisie Ministry Of Higher Education And Scientific Research Of Tunisia	1	0.013
1297	Laboratoire D Epidemiologie D Infections Enzootiques Des Herbivores En Tunisie Ministry Of Higher Education Scientific Research And Information And Communication Technologies Of Tunisia	1	0.013
1298	Laboratoire D Epidemiologie Des Infections Enzootiques Des Herbivores En Tunisie Ministere De La Recherche Scientifique Et De La Promotion Des Competences Tunisia	1	0.013
1299	Laboratoire De Chimie Et Biochimie Pharmacologiques Et Toxicologiques Umr Universite Paris Descartes Cnrs	1	0.013
1300	Laboratory B3aqua Bleu Biotechnology And Aquatic Bio Products Of The National Institute Of Marine Sciences And Technologies Instm La Goulette Tunis Tunisia	1	0.013
1301	Laboratory Food Science And Technology Esiat	1	0.013
1302	Laboratory Of Animal Biological Responses Department Of Veterinary Medicine Rakuno Gakuen University Ebetsu Hokkaido Japan	1	0.013
1303	Laboratory Of Applied Biochemistry And Immunology Burkina Faso	1	0.013
1304	Laboratory Of Epidemiology Of Enzootic Infections In Herbivores In Tunisia Application To Control Ministry Of Higher Education And Scientific Research Tunisia	1	0.013
1305	Laboratory Of Immunology And Molecular Physiology Faculty Of Science Assiut University Egypt	1	0.013
1306	Laboratory Of Protein Engineering And Bioactive Molecules Lip Mb	1	0.013
1307	Laboratory Of Protein Engineering And Bioactive Molecules Lip Mb At The National Institute Of Applied Sciences And Technology Of Tunis University Of Carthage	1	0.013
1308	Laboratory Of Protein Engineering And Bioactive Molecules Lip Mb In The National Institute Of Applied Sciences And Technology Of Tunis University Of Carthage	1	0.013
1309	Labovet Project	1	0.013
1310	Lanzhou University	1	0.013
1311	Laurits Andersen S Fund	1	0.013
1312	Leading Talents Of The Thousand Talents Program Of Central China	1	0.013
1313	Lehre Lmu	1	0.013
1314	Leibniz Gemeinschaft Of The Federal Republic Of Germany	1	0.013
1315	Lek Consulting Inc	1	0.013
1316	Les Amis De L Institut Pasteur De Bruxelles A S B L	1	0.013
1317	Li Ka Shing Foundation	1	0.013
1318	Life Science And Environment Research Institute	1	0.013
1319	Lingnan University	1	0.013
1320	Livestock And Dairy Department Ldd Bahawalpur	1	0.013
1321	Livestock Cgiar Crp	1	0.013
1322	Livestock Promotion Funds From The Japan Racing Association	1	0.013
1323	Local Direction Of Scholarship National Center For Information School And Professional Orientation And Scholarships Of Burkina Faso	1	0.013
1324	Long Term Ecological Research Network An Australian Research Infrastructure Facility Under The National Collaborative Research Infrastructure Strategy And Education Infrastructure Fund	1	0.013
1325	Lorraine University Ur Afpa	1	0.013
1326	Lpps	1	0.013
1327	Lsf Unit Of Nrcc	1	0.013
1328	Lundbeckfonden	1	0.013
1329	M Mammeri University	1	0.013
1330	Machine Allocation On The Teragrid	1	0.013
1331	Mahan Post Doctoral Fellowship From The Fred Hutchinson Cancer Research Center	1	0.013
1332	Major New Drug Creation Program Of China	1	0.013
1333	Major Special Assistance Of Inner Mongolia Autonomous Region China	1	0.013
1334	Major Special Project Of National Science And Technology Research And Development Of New Ethnic Drug Varieties And Its Key Innovation Technology	1	0.013
1335	Major Transformation Of Scientific And Technological Achievements Special Program Of Shaanxi Province China	1	0.013
1336	Malaysian Government	1	0.013
1337	Malaysian Ministry Of Higher Education	1	0.013
1338	Mali International Centers For Excellence In Research Icer Program Of The Division Of Intramural Research Of The Niaid Nih	1	0.013
1339	Manitoba Agriculture Food And Rural Initiatives Mafri	1	0.013
1340	Manitoba Centres Of Excellence Fund Mcef	1	0.013
1341	Marc Freeman Scholarship Fund At Eastern Connecticut State University	1	0.013
1342	Marine Ireland	1	0.013
1343	Mary Sun Medical Scholarship	1	0.013
1344	Mashhad Razi Vaccine And Serum Research Institute	1	0.013
1345	Mashhad University Of Medical Sciences Research Council	1	0.013
1346	Mashhad University Of Medical Sciences Research Council Mashhad Iran	1	0.013
1347	Mathematics Of Information Technology And Complex Systems Networks Of Centres Of Excellence Mitacs Nce	1	0.013
1348	Mcb Program Of The Russian Academy Of Science	1	0.013
1349	Mci Multi Chemical Industry Sante Animale	1	0.013
1350	Mdru	1	0.013
1351	Medical Research Council Global Challenges Research Fund Foundation	1	0.013
1352	Medice Qbtech	1	0.013
1353	Melbourne Water Corporation	1	0.013
1354	Merck Company	1	0.013
1355	Metega Project Through Its Education Audio Visual And Culture Executive Agency Eacea	1	0.013
1356	Mewa Saudi Arabia	1	0.013
1357	Microme Contract Of The Eu	1	0.013
1358	Midas Programme From The National Institute Of General Medical Sciences	1	0.013
1359	Mindef Grant	1	0.013
1360	Ministe Re De L Enseignement Superieur Et De La Recherche Scientifique	1	0.013
1361	Minister Of Science And Higher Education And Jigjiga University	1	0.013
1362	Ministere De L Enseignement Superieur Et De La Recherche Scientifique Of Algeria Projectcnepru	1	0.013
1363	Ministere De L Enseignement Superieur Et De La Recherche Scientifique Tunisie	1	0.013
1364	Ministere De L Enseignement Superieur Of Algeria	1	0.013
1365	Ministere De L Europe Et Des Affaires Etrangeres	1	0.013
1366	Ministry Of Agriculture And Maritime Fisheries Of Morocco	1	0.013
1367	Ministry Of Agriculture And Rural Development	1	0.013
1368	Ministry Of Agriculture And Rural Development Of Ethiopia	1	0.013
1369	Ministry Of Agriculture China	1	0.013
1370	Ministry Of Agriculture Kingdom Of Saudi Arabia	1	0.013
1371	Ministry Of Animal Resources And Fisheries	1	0.013
1372	Ministry Of Business Of Innovation And Employment	1	0.013
1373	Ministry Of Economy And Competitiveness	1	0.013
1374	Ministry Of Education And Science Of The Republic Of Kazakhstan Under The Name Proteomic Investigation Of Camel Milk	1	0.013
1375	Ministry Of Education And Science Russian Federation	1	0.013
1376	Ministry Of Education China 111 Project	1	0.013
1377	Ministry Of Education In 2006	1	0.013
1378	Ministry Of Education In Saudi Arabia	1	0.013
1379	Ministry Of Education Malaysia	1	0.013
1380	Ministry Of Education Of Ethiopia	1	0.013
1381	Ministry Of Education Saudi Arabia	1	0.013
1382	Ministry Of Education Singapore	1	0.013
1383	Ministry Of Education Youth And Sports Of The Czech Republic Projects Cenakva	1	0.013
1384	Ministry Of Environment And Resource Mongolia	1	0.013
1385	Ministry Of Environment Forest And Climate Change Moefcc Government Of India	1	0.013
1386	Ministry Of Environment Water And Agriculture Riyadh Saudi Arabia	1	0.013
1387	Ministry Of Environmental Protection Of P R China	1	0.013
1388	Ministry Of Foreign Affairs The Hague The Netherlands	1	0.013
1389	Ministry Of High Education And Scientific Research Of Tunisia	1	0.013
1390	Ministry Of Higher Education And Research In Algeria	1	0.013
1391	Ministry Of Higher Education And Research Scientific Research And Technology Tunisia	1	0.013
1392	Ministry Of Higher Education And Research Tunisia	1	0.013
1393	Ministry Of Higher Education And Scientific Research Is A Ministry Of The Tunisian Government	1	0.013
1394	Ministry Of Higher Education And Scientific Research Sudan	1	0.013
1395	Ministry Of Higher Education Morocco	1	0.013
1396	Ministry Of Higher Education Republic Of Sudan	1	0.013
1397	Ministry Of Higher Education Scientific Research And Information And Communication Technologies Of Tunisia	1	0.013
1398	Ministry Of Higher Education Scientific Research And Technology Tunisia	1	0.013
1399	Ministry Of Knowledge Economy Mke Republic Of Korea	1	0.013
1400	Ministry Of Research France	1	0.013
1401	Ministry Of Science And Innovation Of Spain Aei Feder Ue	1	0.013
1402	Ministry Of Science And Technology Government Of India New Delhi	1	0.013
1403	Ministry Of Science And Technology S Department Of Biotechnology	1	0.013
1404	Ministry Of Science Technology And Space Most Israel	1	0.013
1405	Ministry Of Science Technology Department Of Biotechnology	1	0.013
1406	Ministry Of Scientific Research And Technology Tunisia	1	0.013
1407	Minnesota Zoo	1	0.013
1408	Miss Maria Louise Johannsen At The Technical University Of Denmark Dtu Food	1	0.013
1409	Mission And Scholarship Sector Egyptian Ministry Of Higher Education And Scientific Research Under The Name Egypt Japan Education Partnership Ejep	1	0.013
1410	Mitsubishi Foundation	1	0.013
1411	Moa 973 Program	1	0.013
1412	Mody University Of Science And Technology	1	0.013
1413	Molecular And Cellular Biology Ran	1	0.013
1414	Mongolian Conservation Cooperative	1	0.013
1415	Monojo	1	0.013
1416	Moroccan Agricultural Ministry	1	0.013
1417	Moroccan Government	1	0.013
1418	Moroccan Ministry Of Agriculture	1	0.013
1419	Morocco And France Programme De Recherche Agronomique Pour Le Developpement Prad	1	0.013
1420	Mount Diablo Sp California	1	0.013
1421	Msc Program In Environmental Sciences At The Uaeu	1	0.013
1422	Mubarak City For Scientific Research And Technology Applications Mucsat	1	0.013
1423	Municipal Healthcare Joint Innovation Major Project Of Guangzhou	1	0.013
1424	Nanotweez	1	0.013
1425	Narsad	1	0.013
1426	Nasa Tcan Award	1	0.013
1427	National And Science Foundation Of Fujian Province	1	0.013
1428	National Animal Health Diagnostic Investigation Center Sebeta Ethiopia	1	0.013
1429	National Basic Science Data Sharing Service Platform	1	0.013
1430	National Biological Specimens And Resources Sharing Platform In Nature Reserve	1	0.013
1431	National Biotechnology Development Plan	1	0.013
1432	National Camel Research Project	1	0.013
1433	National Camel Research Project And University Of Haramaya	1	0.013
1434	National Center For Scientific And Technical Research As Part Of The Research Excellence Fellowship Program	1	0.013
1435	National Center For Scientific And Technical Research Rabat Morocco	1	0.013
1436	National Center For Stem Cell Technology Ncsct King Abdulaziz City For Science And Technology Kacst	1	0.013
1437	National Center Of Biotechnology Riyadh Saudi Arabia	1	0.013
1438	National Center Of Scientific And Technical Research Centre National De La Recherche Scientifique Et Technique	1	0.013
1439	National Center Of Scientific And Technical Research Morocco	1	0.013
1440	National Centre For Stem Cell Technology Ncsct King Abdulaziz City For Science And Technology Kacst	1	0.013
1441	National Centre Of Excellence In Analytical Chemistry University Of Sindh Jamshoro Pakistan	1	0.013
1442	National Commission For Wildlife Conservation And Development	1	0.013
1443	National Council For Research	1	0.013
1444	National Council Of Science Technology And Innovation Nacosti Kenya	1	0.013
1445	National Development Plan Through The Food Institutional Research Measure	1	0.013
1446	National Development Plan Through The Food Institutional Research Measure By The Department Of Agriculture Food	1	0.013
1447	National First Class Discipline Program Of Food Science And Technology	1	0.013
1448	National Geographic Foundation Explorer Grant	1	0.013
1449	National Geographic Society	1	0.013
1450	National Heart Foundation Nhf Of Australia Postdoctoral Fellowship	1	0.013
1451	National Institute For Health Research Health Protection Research Unit For Modelling Methodology	1	0.013
1452	National Institute For Health Research Nihr	1	0.013
1453	National Institute For Medical Research Development Nimad Islamic Republic Of Iran	1	0.013
1454	National Institute Of Allergy And Infectious Diseases National Institutes Of Health Department Of Health And Human Services Under The Centers Of Excellence For Influenza Research And Surveillance Ceirs	1	0.013
1455	National Institute Of Biological Resources Nibr	1	0.013
1456	National Institute Of Environmental Health Sciences Superfund Research Program	1	0.013
1457	National Institute Of Environmental Health Sciences Superfund Research Program U S A	1	0.013
1458	National Institutes For Medical Research Development Nimad Tehran Iran	1	0.013
1459	National International Science And Technology Cooperation Exchange Project	1	0.013
1460	National International Scientific And Technological Cooperation Projects	1	0.013
1461	National Key R D Programme Projects	1	0.013
1462	National Key R D Project	1	0.013
1463	National Key Research And Devel Opment Program Of China China	1	0.013
1464	National Key Research And Development Program	1	0.013
1465	National Key Research And Development Program China	1	0.013
1466	National Key Research And Development Programme	1	0.013
1467	National Key Research And Development Projects Of China China	1	0.013
1468	National Key Science And Technology Projects Of China	1	0.013
1469	National Major Special Project On New Varieties Cultivation For Transgenic Organisms	1	0.013
1470	National Medical Research Council Singapore	1	0.013
1471	National Natural Foundation Of Gansu Province	1	0.013
1472	National Natural Science Funded Project	1	0.013
1473	National Nonprofit Institute Research Grant Of Caf	1	0.013
1474	National Plan For Science And Technology Npst	1	0.013
1475	National Plan For Science And Technology Npst At Kind Saud University	1	0.013
1476	National Plan For Science And Technology Npst By King Saud University	1	0.013
1477	National Plan For Science And Technology Npst Program By King Saud University	1	0.013
1478	National Plan For Science And Technology Npst Programme By King Saud University	1	0.013
1479	National Plan For Science Technology And Innovation Maarifah King Abdul Aziz City For Science And Technology	1	0.013
1480	National Plan For Science Technology And Innovation Maarifah King Abdulaziz City For Science And Technology The Kingdom Of Saudi Arabia	1	0.013
1481	National Plan For Science Technology And Innovation Qassim University	1	0.013
1482	National Plan For Science Technology And Innovation Qassim University Buraydah Saudi Arabia	1	0.013
1483	National Plan For Science Technology Innovation Npst At King Saud University	1	0.013
1484	National Plan For Sciences Technology And Innovation Maarifah King Abdulaziz City For Science And Technology Kingdom Of Saudi Arabia	1	0.013
1485	National Plane Of Science And Technology Health Research Program	1	0.013
1486	National Postdoctoral Fund Project	1	0.013
1487	National Priorities Research Program Nprp From The Qatar National Research Fund	1	0.013
1488	National Reference Laboratory	1	0.013
1489	National Research Centre Ministry Of Higher Education And Scientific Research Egypt	1	0.013
1490	National Research Centre Ministry Of Scientific Research Egypt	1	0.013
1491	National Research Centre On Camel	1	0.013
1492	National Research Fund Kenya	1	0.013
1493	National Science Centre Poland	1	0.013
1494	National Science Technology And Innovation Plan Nstip Strategic Technologies Programs In The Kingdom Of Saudi Arabia	1	0.013
1495	National Science Technology And Innovation Plan Nstip Translational Stem Cell Research Tscr Grant	1	0.013
1496	National Special Research Fund For Public Welfare Agriculture Of China	1	0.013
1497	National Veterinary Laboratory Nvl Islamabad	1	0.013
1498	Natural Environment Research Council Uk Through The Environmental Social Ecology Of Human Infectious Diseases Initiative Esei	1	0.013
1499	Natural Local Bio Resources Laboratory Hassiba Benbouali University Of Chlef	1	0.013
1500	Natural Resources And Environmental Research Institute Nreri	1	0.013
1501	Natural Science Basic Research Program Of Shaanxi Province	1	0.013
1502	Natural Science Foundation Of Fujian Province	1	0.013
1503	Natural Science Foundation Of Inner Mongolia Autonomous Region Hohhot China	1	0.013
1504	Natural Science Foundation Of Shandong Province	1	0.013
1505	Natural Science Foundation Project Of Inner Mongolia Autonomous Region China	1	0.013
1506	Natural Science Fundation Of The Education Department Of Shannxi Province	1	0.013
1507	Natural Science Research Of Jiangsu Higher Edu Cation Institutions Of China	1	0.013
1508	Nature Conservancy Of Washington State	1	0.013
1509	Nature Conservation International	1	0.013
1510	Nature Vet Pty Limited	1	0.013
1511	Nbaf Transition Funds	1	0.013
1512	Nbaf Transition Funds From The State Of Kansas	1	0.013
1513	Nbcits	1	0.013
1514	Nbcits Moa	1	0.013
1515	Nci Ccr Antibody Engineering Program	1	0.013
1516	Neglected Zoonotic Diseases Unit In Department Of The Control Of Neglected Tropical Diseases Who	1	0.013
1517	Netherlands Organization For Scientific Research Nwo	1	0.013
1518	Network Project On Nicra	1	0.013
1519	Network Project On Vtcc	1	0.013
1520	New Zealand Federation Of Graduate Women	1	0.013
1521	Nhf Of Australia Postgraduate Scholarship	1	0.013
1522	Nht	1	0.013
1523	Niaid Centers Of Excellence For Influenza Research And Surveillance	1	0.013
1524	Niedersachsen Research Network On Neuroinfectiology N Rennt Of The Ministry Of Science And Culture Of Lower Saxony Germany	1	0.013
1525	Niehs Cryo Em Core	1	0.013
1526	Niehs River Award	1	0.013
1527	Niehs Superfund Research Program	1	0.013
1528	Niehs Superfund Research Program Of Usa	1	0.013
1529	Nih Eunice Kennedy Shriver National Institute Of Child Health Human Development Nichd	1	0.013
1530	Nih From The Institute Development Award Program Of The National Center For Research Resources	1	0.013
1531	Nih National Center For Advancing Translational Sciences Ncats	1	0.013
1532	Nih National Eye Institute Nei	1	0.013
1533	Nih National Institute Of Neurological Disorders Stroke Ninds	1	0.013
1534	Nih National Institute On Drug Abuse Nida	1	0.013
1535	Nihr Rare Diseases Translational Research Collaboration	1	0.013
1536	Nippon Foundation	1	0.013
1537	Noor Diagnostics And Innovation At Kaust	1	0.013
1538	Norad Ken	1	0.013
1539	North And North East Camel Breeding Center Jihad E Agriculture Organization Of Semnan Province	1	0.013
1540	North South Centre At Eth Zurich Switzerland	1	0.013
1541	North South Centre Eth	1	0.013
1542	North South Centre Of Eth Zurich Switzerland	1	0.013
1543	North Star Archaeological Research Program	1	0.013
1544	Northern Kenya From The Kenya Government S Commission For Higher Education	1	0.013
1545	Northern Scientific Training Program	1	0.013
1546	Northern Supplement Nserc	1	0.013
1547	Norwegian Programme For Development Research And Education Nufu	1	0.013
1548	Norwegian University Of Life Sciences Department Of International Environment And Development Studies	1	0.013
1549	Norwegian University Of Life Sciences Through Noragric Department Of International Environment And Development Studies	1	0.013
1550	Novartis	1	0.013
1551	Novo Nordisk Foundation	1	0.013
1552	Novocure Limited	1	0.013
1553	Nrcc	1	0.013
1554	Nrcc Bikaner	1	0.013
1555	Nrf	1	0.013
1556	Nserc Ips Scholarship	1	0.013
1557	Nserc Metabiolac Industrial Research Chair	1	0.013
1558	Nsf Directorate For Social Behavioral Economic Sciences Sbe	1	0.013
1559	Nstip Strategic Technologies Program In The Kingdom Of Saudi Arabia	1	0.013
1560	Nuffic	1	0.013
1561	Nutrainax Laboratories Incorporated	1	0.013
1562	Ocotillo Wells Off Highway Vehicle Park Ohv California	1	0.013
1563	Office De L Elevage Et Des Paturages Strategie Nationale Pour La Promotion De L Elevage Camelin 2016 2020	1	0.013
1564	Office Of Global Affairs At The Department Of Health And Human Services	1	0.013
1565	Office Of Naval Research Young Investigation Program	1	0.013
1566	Office Of Research Affairs Ferdowsi University Of Mashhad	1	0.013
1567	Office Of Research Affairs Ferdowsi University Of Mashhad Iran	1	0.013
1568	Office Of Research Affairs Golestan University	1	0.013
1569	Office Of The Vice Chancellor For Research Of Urmia University	1	0.013
1570	Office Of The Vice President For Research And Technology Transfer	1	0.013
1571	Office Of Vice Chancellor For Research At Shiraz University Of Medical Sciences	1	0.013
1572	Office Of Vice Chancellor For Research At Sums Shiraz University Of Medical Sciences	1	0.013
1573	Office Of Vice Chancellor For Research Of The Kerman University Of Medical Sciences Kerman Iran	1	0.013
1574	Oie	1	0.013
1575	Oie Reference Laboratory Of The Italian Istituti Zooprofilattici Sperimentali Izsam	1	0.013
1576	Oie Reference Laboratory Of The Italian Istituti Zooprofilattici Sperimentali Izsler	1	0.013
1577	Oie Reference Laboratory Of The Italian Istituti Zooprofilattici Sperimentali Izssi	1	0.013
1578	Onev	1	0.013
1579	Ontario Veterinary College Fellowship Programme	1	0.013
1580	Open Foundation Of Chinese Educational Department Key Laboratory Of Arid And Grass Land Agroecology	1	0.013
1581	Open Fund Of The Key Laboratory Of The New Animal Drug Project Of Gansu Province	1	0.013
1582	Open Project Of State Key Laboratory Of Respiratory Disease	1	0.013
1583	Open Project Program Of Beijing Key Laboratory Of Flavor Chemistry Beijing Technology And Business University	1	0.013
1584	Ophthalmic Ultrasound Unit Of Benha Special Eye Hospital	1	0.013
1585	Opus Grant Of The National Science Foundation Ncn Poland	1	0.013
1586	Orca Fp7 People Iof	1	0.013
1587	Organ Pipe Cactus Nm Arizona	1	0.013
1588	Organisation Of Agriculture	1	0.013
1589	Organisation Of Jihad E Agriculture Ministry Of Jihad E Agriculture Ardabil Province	1	0.013
1590	Organization Of Jihad Eagriculture	1	0.013
1591	Oromia Regional State Rural Capacity Building Addis Ababa University	1	0.013
1592	Orthopterists Society	1	0.013
1593	Overseas Expertise Introduction Project For Discipline Innovation 111 Project	1	0.013
1594	Pace	1	0.013
1595	Pak Uscas	1	0.013
1596	Pakistan Agriculture Research Council Parc	1	0.013
1597	Pakistan Council Of Scientific And Industrial Research Karachi Pakistan	1	0.013
1598	Pakistan Science Foundation Psf	1	0.013
1599	Pakistan Science Foundation Psf Islamabad	1	0.013
1600	Palevoprim	1	0.013
1601	Pamela Burger	1	0.013
1602	Parc	1	0.013
1603	Parc Alp Agriculture Linkage Program	1	0.013
1604	Pasteur Institute Of Iran	1	0.013
1605	Pasteur Institute Of Tehran Iran	1	0.013
1606	Pasteur Institute Tehran	1	0.013
1607	Patient Centered Outcomes Research Institute Pcori	1	0.013
1608	Pegah Milk Company	1	0.013
1609	Peking University Health Science Center Innovative Fund For Doctoral Students	1	0.013
1610	Pew Charitable Trusts	1	0.013
1611	Pharmaceutical Sciences Branch Islamic Azad University Iaups	1	0.013
1612	Pinnacles National Monument Nm California	1	0.013
1613	Plan For Science Technology And Innovation Of The Principality Of Asturias	1	0.013
1614	Plan For Science Technology And Innovation Of The Principality Of Asturias 2018 2020	1	0.013
1615	Plan Regional De Investigacion Del Principado De Asturias Spain	1	0.013
1616	Point Reyes Sp California	1	0.013
1617	Polar Continental Shelf Program	1	0.013
1618	Polish Scientific Committee	1	0.013
1619	Post Graduate Institute Of Veterinary Education And Research Pgiver Jaipur	1	0.013
1620	Postdoctoral Innovative Talents Support Program	1	0.013
1621	Postdoctoral Research Funding Plan In Jiangsu Province	1	0.013
1622	Prad	1	0.013
1623	Prad Programs	1	0.013
1624	Prad Project Entitled Skin Diseases And Mineral Metabolism In Camel	1	0.013
1625	Prad Research Projects In Agriculture For Development	1	0.013
1626	Praemium Academiae Award	1	0.013
1627	Prairie City Ohv Park California	1	0.013
1628	President Foundation Of Tarim University	1	0.013
1629	Prima Program	1	0.013
1630	Prima Programme	1	0.013
1631	Primary Industries And Regions Of South Australian Under Australian Pest Animal Management Program	1	0.013
1632	Procamed European Project	1	0.013
1633	Procamed Project	1	0.013
1634	Profi5 Finpharma Academy Project	1	0.013
1635	Program For Changjiang Scholars Innovative Research Team In University Pcsirt	1	0.013
1636	Program For New Century Excellent Talents In University Ncet	1	0.013
1637	Program For Young And Middle Aged Leading Science Technology And Innovation Of Xinjiang Production Construction Corps	1	0.013
1638	Program For Young And Middle Aged Leading Science Technology And Innovation Of Xinjiang Production Construction Group	1	0.013
1639	Program Of Guizhou Provincial Tobacco Company	1	0.013
1640	Program Of Shanghai Academic Research Leader	1	0.013
1641	Program Of The Jiangsu Key Laboratory Of Advanced Food Manufacturing Equipment Technology	1	0.013
1642	Program Of The Key Research And Development Projects In Xinjiang Province	1	0.013
1643	Program On Emerging And Reemerging Infectious Diseases From The Japan Agency For Medical Research And Development Amed Japan	1	0.013
1644	Programme Federateurs De Recherche Developpement En Agriculture Proferd Of Moroccan Ministry Of Agriculture	1	0.013
1645	Project Cmep Tssili	1	0.013
1646	Project Increasing The Impact Of Excellence Research On The Capacity For Innovation And Technology Transfer Within Usamvb Timis Oara	1	0.013
1647	Project Intelligent Specialization Program At Kaposvar University	1	0.013
1648	Project Sif Novel Bioactives Callaghan Innovation Internal Funding	1	0.013
1649	Projet De Cooperation Tuniso Espagnole	1	0.013
1650	Promt Project Of The Cam	1	0.013
1651	Prospective Industry University Research Project Of Guangdong Province	1	0.013
1652	Prospective Industry University Research Project Of Jiangsu Province	1	0.013
1653	Protein Research Chair Department Of Biochemistry College Of Science King Saud University	1	0.013
1654	Provincial Natural Science Foundation Of Gansu	1	0.013
1655	Prusst	1	0.013
1656	Public Welfare Project Of The National Scientific Research Institution	1	0.013
1657	Qassim University Kingdome Of Saudi Arabia	1	0.013
1658	Qatar Foundation	1	0.013
1659	Qatar National Library Qnl	1	0.013
1660	Qatar National Research Fund A Member Of Qatar Foundation	1	0.013
1661	R J Reynolds Tobacco Company	1	0.013
1662	Rajasthan University Of Veterinary And Animal Sciences Bikaner Rajasthan	1	0.013
1663	Rajuvas Bikaner	1	0.013
1664	Ramin Agriculture And Natural Resources University Of Khuzestan	1	0.013
1665	Rangelands Natural Resource Management	1	0.013
1666	Rangelands Natural Resource Management Coordinating Group	1	0.013
1667	Razi Vaccine And Serum Institute	1	0.013
1668	Razi Vaccine And Serum Research Institute	1	0.013
1669	Razi Vaccine And Serum Research Institute Karaj Iran	1	0.013
1670	Razi Vaccine And Serum Research Institute Rvsri	1	0.013
1671	Razi Vaccine And Serum Research Institute Shiraz	1	0.013
1672	Rd Project Carebio2 Comparative Assessment Of Antimicrobial Resistance In Environmental Biofilms Through Proteomics Towards Innovative Theranostic Biomarkers European Regional Development Fund Erdf Through The Northern Regional Operational Program N	1	0.013
1673	Recruitment Program Of Global Youth Experts	1	0.013
1674	Region Des Hauts De France Through The Contrat Plan Etat Region Cper Alibiotech 2016 2020	1	0.013
1675	Region Hauts De France	1	0.013
1676	Region Nouvelle Aquitaine	1	0.013
1677	Regional Pastoral Livelihood Resilience Project	1	0.013
1678	Regional Project I D Pi Canary Islands Government	1	0.013
1679	Remix European Union S Horizon 2020 Research And Innovation Programme Under The Maria Sklodowska Curie Grant	1	0.013
1680	Republic Of The Sudan Sudanese Ministry Of Higher Education And Scientific Research Commission Of Scientific Research And Innovation	1	0.013
1681	Research Affairs At The Uae University	1	0.013
1682	Research Affairs At The United Arab Emirates University	1	0.013
1683	Research Affairs Of Shahid Chamran University Of Ahvaz	1	0.013
1684	Research And Extension Office Of Hawassa University	1	0.013
1685	Research And Technology	1	0.013
1686	Research Center At The College Of Tourism Archaeology King Saud University Riyadh Saudi Arabia	1	0.013
1687	Research Center Of The Center For Female Scientific And Medical Colleges Deanship Of Scientific Research King Saud University Riyadh Saudi Arabia	1	0.013
1688	Research Center Of The Center For Female Scientific And Medical Colleges King Saud University	1	0.013
1689	Research Center Of The College Of Food And Agricultural Sciences	1	0.013
1690	Research Center Of The College Of Food And Agriculture Sciences	1	0.013
1691	Research Center Of The Female Scientific And Medical College Deanship Of Scientific Research King Saud University Saudi Arabia	1	0.013
1692	Research Center Of The Female Scientific And Medical Colleges Deanship Of Scientific Research King Saud University Riyadh Saudi Arabia	1	0.013
1693	Research Center Of The Female Scientific And Medical Colleges King Saud University	1	0.013
1694	Research Center Of The Female Scientific And Medical Colleges The Deanship Of Scientific Research King Saud University	1	0.013
1695	Research Council Grant University Grant Council	1	0.013
1696	Research Council Of Ferdowsi University Of Mashhad	1	0.013
1697	Research Council Of Islamic Azad University Shahrekord Branch	1	0.013
1698	Research Council Of Mashhad University Of Medical Sciences	1	0.013
1699	Research Council Of Sari Agricultural Sciences And Natural Resources University Sari Iran	1	0.013
1700	Research Council Of Shahid Bahonar At The University Of Kerman	1	0.013
1701	Research Council Of Shahid Chamran University	1	0.013
1702	Research Council Of Shiraz University	1	0.013
1703	Research Council Of The Islamic Azad University Mashhad Branch And Research Department Of Razi Institute Northeast Branch	1	0.013
1704	Research Council Of The Shahrekord University Shahrekord Iran	1	0.013
1705	Research Council Of University Of Tehran Tehran Iran	1	0.013
1706	Research Councils Of University Of Isfahan	1	0.013
1707	Research Grant Council Grant University Grant Council	1	0.013
1708	Research Groups Track	1	0.013
1709	Research Institute For Endocrine Sciences	1	0.013
1710	Research Medical Center Of Hamad Medical Corporation	1	0.013
1711	Research Office Mashhad University Of Medical Sciences Mashhad Iran	1	0.013
1712	Research Program On Emerging And The Re Emerging Infectious Diseases	1	0.013
1713	Research Program On Hepatitis	1	0.013
1714	Research Programme Of Cas	1	0.013
1715	Research Project Epidemiologie De Maladies Bacteriennes A Transmission Vectorielle Des Herbivores	1	0.013
1716	Research Project Of Graduate Teacher Of Higher Education In Gansu Province	1	0.013
1717	Research Project Of Postgraduate S Teacher In Colleges And Universities Of Gansu Province	1	0.013
1718	Research Project Of Postgraduate Teachers In Colleges And Universities Of Gansu Province	1	0.013
1719	Research Project Resantibiovet Ministry Of Agriculture Of Tunisia	1	0.013
1720	Research Projects Of National Relevance Prin	1	0.013
1721	Researcher Foundation Of The Chinese Academy Of Agricultural Sciences	1	0.013
1722	Rfa 2 From Agricultural Research Council Of Nigeria Through The Competitive Agricultural Research Grant Scheme Cargs	1	0.013
1723	Rita Allen Foundation Nih	1	0.013
1724	Rkvy Rashtriya Krishi Vikasyojna Bio Informatics Project	1	0.013
1725	Roche Holding	1	0.013
1726	Romark	1	0.013
1727	Royal Camel Corps Muscat Sultanate Of Oman	1	0.013
1728	Royal Court Affairs Sultanate Of Oman	1	0.013
1729	Royal Geographical Society	1	0.013
1730	Royal Veterinary College	1	0.013
1731	Ruler Of Dubai And Prime Minster Of Uae	1	0.013
1732	Rumen Ecology Unite Lethbrideg Research Center	1	0.013
1733	Russia President Grant	1	0.013
1734	Russian Academy Of Sciences	1	0.013
1735	Russian Science Foundation Rsf	1	0.013
1736	Sa Sibs Scholarship Programme	1	0.013
1737	Saad Research Development Center At Saad Specialist Hospital	1	0.013
1738	Sabzbavaran E Nouandish Rural Co Op Company	1	0.013
1739	Sabzbavaran E Nouandish Rural Co Op Company Shiraz Fars I R Iran	1	0.013
1740	Saint Louis Zoo Institute For Conservation Medicine	1	0.013
1741	San Bernardino National Forest California	1	0.013
1742	Sanofi Pasteur	1	0.013
1743	Sari Agricultural Sciences And Natural Resources University	1	0.013
1744	Saudi Basic Industries Corportion Sabic	1	0.013
1745	Saudi Ministry Of Environment Water And Agriculture Mewa	1	0.013
1746	School Level Scientific Research Project Of Ningxia Medical University	1	0.013
1747	School Of Agriculture And Food Sciences At The University Of Queensland	1	0.013
1748	School Of Animal And Veterinary Sciences Of The University Of Adelaide	1	0.013
1749	School Of Behavioural Cognitive And Social Science The University Of New England	1	0.013
1750	School Of Pharmaceutical Sciences S O A University Bhubaneswar India	1	0.013
1751	School Of Public Health And Institute Of Public Health Researches Tehran University Of Medical Sciences Tums	1	0.013
1752	School Of Public Health Deputy For Education Tehran University Of Medical Sciences Tums	1	0.013
1753	School Of Veterinary Medicine Shiraz University	1	0.013
1754	School Of Veterinary Medicine Shiraz University Shiraz Iran	1	0.013
1755	School Of Veterinary Medicine University Of Shiraz	1	0.013
1756	Schwartz Research Fund For Women In The Life Sciences	1	0.013
1757	Science And Technology Development Plan Of Shandong Province China	1	0.013
1758	Science And Technology Innovation Action Plan Of Shanghai	1	0.013
1759	Science And Technology Major Project Of Inner Mongolia Autonomous Region Of China	1	0.013
1760	Science And Technology Planning Project Of Guangdong Province	1	0.013
1761	Science And Technology Project Of Inner Mongolia Autonomous Region	1	0.013
1762	Science And Technology Support Project Of Xinjiang China	1	0.013
1763	Science And Technology Unit King Abdulaziz University	1	0.013
1764	Science Foundation Of Bijie District Grant	1	0.013
1765	Science Technology And Innovation Funding Authority Stifa Egypt	1	0.013
1766	Science Technology Innovational Foundation Of Gansu Agricultural University	1	0.013
1767	Scientific And Technical Innovation Talent Foundation Of Harbin	1	0.013
1768	Scientific And Technical Research Center For Arid Areas Crstra In Algeria	1	0.013
1769	Scientific And Technological Transformative Project Of Inner Mongolia Autonomous Region China	1	0.013
1770	Scientific Centres And Presidential Camels	1	0.013
1771	Scientific Exchange Program Between Morocco And France	1	0.013
1772	Scientific Research Corporation Of Ministry Of Higher Education And Scientific Research Khartoum Sudan	1	0.013
1773	Scientific Research Corporation Of The Ministry Of Higher Education And Scientific Research Khartoum Sudan	1	0.013
1774	Scientific Research Deanship King Faisal University	1	0.013
1775	Scientific Research Deanship King Faisal University Saudi Arabia	1	0.013
1776	Scientific Research Foundation For Young Teachers Of North China Electric Power University	1	0.013
1777	Scientific Research Foundation Of Jiangsu Health And Health Committee	1	0.013
1778	Scientific Research Fund Benha University	1	0.013
1779	Scientific Research King Faisal University Kingdom Of Saudi Arabia	1	0.013
1780	Scientific Research Project For Major Achievements Of The Agricultural Science And Technology Innovation Program Beijing China	1	0.013
1781	Scientific Research Support Fund Jordan	1	0.013
1782	Secretaria De Ciencia Y Tecnica Universidad Nacional De Cordoba Secyt	1	0.013
1783	Seed Funding For Trs And Strategic Research Theme Fund The University Of Hong Kong	1	0.013
1784	Service De L Archeologie Du Service Public De Wallonie	1	0.013
1785	Shahid Bahonar University Of Kerman Iran	1	0.013
1786	Shahid Bahonar University Of Kerman Younes Ghahvei Phd Thesis Project	1	0.013
1787	Shahid Beheshti University Of Medical Sciences Faculty Of Medicine Tehran Iran	1	0.013
1788	Shahid Chamran University Of Ahvaz	1	0.013
1789	Shahid Chamran University Of Ahvaz Iran	1	0.013
1790	Shahid Rajaee Teacher Training University Srttu	1	0.013
1791	Shahrekord University	1	0.013
1792	Shaik Al Amodi Autism Research Chair	1	0.013
1793	Shanghai Key Disciplines Of Respiratory	1	0.013
1794	Shanghai Municipal Science And Technology Major Project	1	0.013
1795	Shanghai Pujiang Talent Plan	1	0.013
1796	Shanghai Science Technology Committee	1	0.013
1797	Shanghaitech University	1	0.013
1798	Shaqra University Deanship Of Scientific Research	1	0.013
1799	Shaqra University Saudi Arabia	1	0.013
1800	Sheikh Hamdan Award For Medical Sciences	1	0.013
1801	Sheikh Hamdan Bin Rashid Al Maktoum Award	1	0.013
1802	Sheikh Hamdan Bin Rashid Al Maktoum Award For Medical Sciences Grant	1	0.013
1803	Shenzhen Government	1	0.013
1804	Shenzhen Peacock Plan High End Talents Program	1	0.013
1805	Shiraz University Iran	1	0.013
1806	Shiraz University Of Medical Sciences	1	0.013
1807	Shiraz University Of Medical Sciences Sums	1	0.013
1808	Shiraz University School Of Veterinary Medicine Shiraz Iran	1	0.013
1809	Shiraz University Shiraz Iran	1	0.013
1810	Shire	1	0.013
1811	Shire Pharma	1	0.013
1812	Shire Pharmaceuticals	1	0.013
1813	Sida Project	1	0.013
1814	Singapore Zoo	1	0.013
1815	Sino Africa Joint Research Center Chinese Academy Of Sciences	1	0.013
1816	Sino Africa Joint Research Centre Chinese Academy Of Sciences	1	0.013
1817	Smithsonian National Zoological Park Conservation Biology Institute	1	0.013
1818	Social Sciences And Humanities Research Council Of Canada Sshrc	1	0.013
1819	Sorpari	1	0.013
1820	South African Medical Research Council	1	0.013
1821	South Australian Arid Lands Nrm Board	1	0.013
1822	Southern Region Soil Laboratory Of Ethiopia Wolkite Branch	1	0.013
1823	Soutien De L Elevage Dans Le Camps Refugies Sahraouis	1	0.013
1824	Spanish Ministry Of Economy Industry And Competitiveness Mineco	1	0.013
1825	Spanish Ministry Of Science Innovation And University Agencia Estatal De Investigacion	1	0.013
1826	Special Fund For Agro Scientific Research In The Public Interest China	1	0.013
1827	Special Fund For Agro Scientific Research In The Public Research	1	0.013
1828	Special Fund For Basic Scientific Research Of Institute Of Animal Science Chinese Academy Of Agricultural Sciences	1	0.013
1829	Special Project Of National Scientific Fundamental	1	0.013
1830	Special Project Of The Inner Mongolia Autonomous Region The Chinese Academy Of Sciences	1	0.013
1831	Specialized Research Fund For The Doctoral Program Of Higher Education Srfdp	1	0.013
1832	Squ Administration	1	0.013
1833	Squ Uaeu	1	0.013
1834	Sristi Birac	1	0.013
1835	St Flow	1	0.013
1836	St Flow Contract Of The Eu	1	0.013
1837	Startup Fund Of Collaboration Scientific Research Item Of Chunhui	1	0.013
1838	State Key Basic Research Programme 973	1	0.013
1839	State Key Lab	1	0.013
1840	State Key Laboratory For Agro Biotechnology Of China	1	0.013
1841	State Key Laboratory Of Animal Nutrition Beijing China	1	0.013
1842	State Key Laboratory Of Food Science And Technology Nanchang University	1	0.013
1843	State University Usa	1	0.013
1844	Stem Cell Technology Research Center Tehran Iran	1	0.013
1845	Step B Project World Bank Jot Award	1	0.013
1846	Stipend Commission Of The City Of Basel Stadt	1	0.013
1847	Stranahan Endowment Fund For Oncological Research	1	0.013
1848	Strategic Priority Research Program Of The Cas	1	0.013
1849	Strategic Priority Science And Technology Programme Of Chinese Academy Of Sciences Category B	1	0.013
1850	Strategic Research Theme Fund The University Development Fund The University Of Hong Kong	1	0.013
1851	Strategic Research Theme Fund University Of Hong Kong	1	0.013
1852	Strategic Technology Program Of The National Science Technology And Innovation Plan Npst Of The Kingdom Of Saudi Arabia	1	0.013
1853	Subtr Project Under The Tr Project Of Animal Health Improvement Within The 1st Thematic Research Tr Of Addis Ababa University Ethiopia	1	0.013
1854	Suez Canal University	1	0.013
1855	Supreme Committee For Delivery And Legacy Scdl	1	0.013
1856	Supreme Council Of Health Administration Through Health Promotion Department	1	0.013
1857	Sure Plus 2019 Grant From United Arab Emirates University	1	0.013
1858	Suzhou Kowloon Hospital	1	0.013
1859	Sweden International Foundation For Science	1	0.013
1860	Swedish International Development And Cooperation Sida	1	0.013
1861	Swedish University Of Agricultural Sciences	1	0.013
1862	Swiss Agency For Development And Cooperation	1	0.013
1863	Swiss Tph	1	0.013
1864	Taif University	1	0.013
1865	Taif University Ksa	1	0.013
1866	Taif University Of Kingdom Of Saudi Arabia	1	0.013
1867	Taif University Researchers Supporting Project Taif University Taif Saudi Arabia	1	0.013
1868	Taishan Scholar Project Of Shandong Province China	1	0.013
1869	Taishan Scholars Program Of Shandong Province	1	0.013
1870	Tarbiat Modares University	1	0.013
1871	Tarbiat Modares University School Of Medical Sciences Department Of Biotechnology Tehran Iran	1	0.013
1872	Teaching And Research Award Programme For Outstanding Young Teachers In Higher Education Institution Of Moe	1	0.013
1873	Technology And Research Institute Snow Brand Milk Products Co Ltd	1	0.013
1874	Ten Thousand Talents Program In Yunnan Province	1	0.013
1875	Terry Fox Foundation	1	0.013
1876	Texas Tech University	1	0.013
1877	Tharb Camel Hospital In Leawina Qatar	1	0.013
1878	The Advantage Discipline Construction Fund	1	0.013
1879	The David Lucile Packard Foundation	1	0.013
1880	The French Embassy At Almaty Kazakhstan	1	0.013
1881	The Youth Innovation Team Of Shaanxi Universities	1	0.013
1882	Thematic Research Program Of Addis Ababa University	1	0.013
1883	Theme Based Research Scheme	1	0.013
1884	Theme Based Research Scheme Of The University Grant Committee	1	0.013
1885	Theme Based Research Scheme Research Grant Council Grant University Grant Council	1	0.013
1886	Theme Based Research Scheme Research Grants Council Hong Kong	1	0.013
1887	Theme Based Research Scheme University Grant Committee Hong Kong	1	0.013
1888	Tianjin Entry Exit Inspection And Quarantine Bureau	1	0.013
1889	Tlc Foundation For Bodyfocused Repetitive Behaviors	1	0.013
1890	Top Project Grant Zonmw	1	0.013
1891	Top Up Assistance Program Scholarship Tuap By The University Of Queensland	1	0.013
1892	Top Up Assistance Program Tuap Scholarship University Of Queensland	1	0.013
1893	Toronto Zoo Reproductive Physiology Fund	1	0.013
1894	Traditional And Complementary Medicine Research Center Sabzevar University Of Medical Sciences Ir Iran	1	0.013
1895	Tropical Medicine Research Institute Tmri National Centre Of Research Ncr Khartoum Sudan	1	0.013
1896	Trust For Mutual Understanding	1	0.013
1897	Tsinghua Initiative Research Program	1	0.013
1898	Tunisian And French Governmental Authorities	1	0.013
1899	Tunisian Authority Centre De Recherche En Infectiologie Porcine Et Aviaire Cripa Fond De Recherche Du Quebec Nature Et Technologie Frqnt	1	0.013
1900	Tunisian Ministry For Higher Education Scientific Research And Technology	1	0.013
1901	Tunisian Ministry Of Higher Education And Research	1	0.013
1902	Tunisian Ministry Of Higher Education And Scientific Research Tunisia	1	0.013
1903	Tunisian Ministry Of Higher Education Scientific Research And Technology	1	0.013
1904	Twasol Research Excellence Program Tre Program King Saud University Riyadh Saudi Arabia	1	0.013
1905	U S Department Of Defense S Defense Threat Reduction Agency	1	0.013
1906	U S Embassy In Addis Ababa Ethiopia	1	0.013
1907	Uae And Ruler Of Dubai	1	0.013
1908	Uae University For Research Affairs	1	0.013
1909	Uae University Interdisciplinary Grant	1	0.013
1910	Uae University Through A Upar	1	0.013
1911	Uae University Through Seed Money Grant Scheme	1	0.013
1912	Uae University United Arab Emirates	1	0.013
1913	Uaeu Postdoc Grant	1	0.013
1914	Uaeu Postdoctoral Grant	1	0.013
1915	Uaeu Program For Advanced Research Upar	1	0.013
1916	Uaeu Zayed Center For Health Sciences Zchs	1	0.013
1917	Ubs Optimus Foundation Switzerland	1	0.013
1918	Udaipur And Centre And National Research Centre On Camels Bikaner	1	0.013
1919	Uk Department For International Development Dfid Under The Umbrella Of The Stamp Out Sleeping Sickness Sos Programme	1	0.013
1920	Uk Medical Research Council Biotechnology And Biological Science Research Council Uk	1	0.013
1921	Uk Overseas Research Students Awards Scheme	1	0.013
1922	Uk Public Health Rapid Support Team	1	0.013
1923	Uk S Biotechnology And Biological Sciences Research Council Bbsrc Under The Combating Infectious Diseases In Livestock For International Development Cidlid Scheme	1	0.013
1924	Uktnp	1	0.013
1925	Umr Selmet Systemes D Elevage Mediterraneens Et Tropicaux Of The Inra Institute	1	0.013
1926	Undp Gef Conservation Of The Great Gobi Ecosystem And Its Endangered Species Project	1	0.013
1927	Unesco Chain On Interdisciplinary Research In Diabetes University Of Tehran Tehran Iran	1	0.013
1928	Unesco Chair On Interdisciplinary Research In Diabetes At University Of Tehran	1	0.013
1929	Unesco Chair On Interdisciplinary Research In Diabetes Iran Society Of Biophysical Chemistry	1	0.013
1930	Unesco Tremu	1	0.013
1931	Unik Initiative Of The Danish Ministry Of Research And Technology	1	0.013
1932	Unite De Recherche En Energies Renouvelables En Milieu Saharien Urer Ms Centre De Developpement Des Energies Renouvelables Cder Of Adrar Algeria	1	0.013
1933	United Arab Emirates	1	0.013
1934	United Arab Emirates Uae	1	0.013
1935	United Arab Emirates University Al Ain	1	0.013
1936	United Arab Emirates University Al Ain Uae	1	0.013
1937	United Arab Emirates University Al Ain Uae Through A Upar Grant	1	0.013
1938	United Arab Emirates University Al Ain Via Uaeu Squ Joint Project	1	0.013
1939	United Arab Emirates University Alain Uae	1	0.013
1940	United Arab Emirates University Program For Advanced Research Upar	1	0.013
1941	United Arab Emirates University Uae Nrf	1	0.013
1942	United Arab Emirates University Uaeu Social Science Ethics Committee Al Ain Uae	1	0.013
1943	United Arab Emirates University Uaeu Via Sure Plus Grant	1	0.013
1944	United Arab Emirates University Uaeu Via The Upar Project	1	0.013
1945	United Arab Emirates University Uaeu Zchs	1	0.013
1946	United Arab Emirates University United Arab Emirates	1	0.013
1947	United Arab Emirates University Upar	1	0.013
1948	United Arab Emirates University Upar Grant	1	0.013
1949	United Arab Emirates University Via Squ Uae	1	0.013
1950	United Arab University	1	0.013
1951	United Kingdom Biotechnology And Biological Sciences Research Council Bbsrc Newton Utafiti Fund Project	1	0.013
1952	United Nations Educational Scientific And Cultural Organization Unesco	1	0.013
1953	United States Council For International Exchange Of Scholars	1	0.013
1954	United States Department Of Agriculture Agricultural Research Service Division Of Geis Operations	1	0.013
1955	United States Department Of Energy Doe	1	0.013
1956	United States Environmental Protection Agency	1	0.013
1957	Universita Degli Studi Di Torino	1	0.013
1958	Universitat Hamburg Hamburg Germany	1	0.013
1959	Universite Mouloud Mammeri Of Tizi Ouzou Algeria	1	0.013
1960	Universiti Malaya	1	0.013
1961	Universiti Putra Malaysia	1	0.013
1962	Universiti Sains Malaysia Research University Individual Usm Rui	1	0.013
1963	University Of Bahri Khartoum Sudan	1	0.013
1964	University Of Bristol	1	0.013
1965	University Of Gabes	1	0.013
1966	University Of Glasgow S College Of Medical Veterinary And Life Sciences Doctoral Training Programme	1	0.013
1967	University Of Haramaya	1	0.013
1968	University Of Helsinki	1	0.013
1969	University Of Isfahan	1	0.013
1970	University Of L Aquila	1	0.013
1971	University Of Laghouat	1	0.013
1972	University Of Liverpool Research Development	1	0.013
1973	University Of Malaya Research Grant	1	0.013
1974	University Of Michigan Institution African Studies Center	1	0.013
1975	University Of Michigan Institution Department Of Afroamerican And African Studies	1	0.013
1976	University Of Michigan Institution Graham Environmental Sustainability Institute	1	0.013
1977	University Of Michigan Institution International Institute	1	0.013
1978	University Of Michigan Institution Rackham Graduate School	1	0.013
1979	University Of Michigan Institution School Of Natural Resources And Environment	1	0.013
1980	University Of Michigan System	1	0.013
1981	University Of Munich	1	0.013
1982	University Of Pannonia Pe	1	0.013
1983	University Of Rhode Island College Of Environmental Life Sciences	1	0.013
1984	University Of Sevilla Spain	1	0.013
1985	University Of Sharjah Research Center Sharjah Uae	1	0.013
1986	University Of Sharjah Sharjah Uae	1	0.013
1987	University Of Sousse	1	0.013
1988	University Of Tehran Center Of Excellence In Biothermodynamics Cebiotherm	1	0.013
1989	University Of Tehran Iran National Science Foundation Insf	1	0.013
1990	University Of Tennessee Institute Of Agriculture Seed Grant Program For International Collaboration	1	0.013
1991	University Of Toronto	1	0.013
1992	University Of Tubingen	1	0.013
1993	University Of Vermont Undergraduate Research Endeavors Competitive Award Ureca	1	0.013
1994	University Of Veterinary And Pharmaceutical Sciences	1	0.013
1995	University Of Veterinary Medicine Hannover	1	0.013
1996	University Of Veterinary Medicine Hannover Foundation Within The Funding Programme Open Access Publishing	1	0.013
1997	University Of Veterinary Medicine Hannover Hanover Germany	1	0.013
1998	University Postgraduate Scholarship	1	0.013
1999	University Program For Advancement In Re Search Upar Grant By The United Arab Emirates University	1	0.013
[truncated: 81 more rows]
